# Supplementary material for: KEAP1 loss modulates sensitivity to kinase targeted therapy in lung cancer
Source: eLife. 2017 Feb 1;6:e18970. doi: 10.7554/eLife.18970 (PMC5305212; doi:10.7554/eLife.18970)
Supplement: Supplementary file 3. — Metabolite levels are shown for DMSO- or drug-treated samples. Metabolite differences were analyzed by normalizing samples by total levels and comparing replicate samples in groups that satisfy significance of p<0.05 using an unpaired two-tailed t-test. DOI: http://dx.doi.org/10.7554/eLife.18970.027 [file elife-18970-supp3.xlsx]

## Sheet: CALU1 Data
Sample Type	No inf_DMSO_1	No inf_DMSO_2	No inf_DMSO_3	No inf_DMSO_4	sgGFP_DMSO_1	sgGFP_DMSO_2	sgGFP_DMSO_3	sgGFP_DMSO_4	sgKEAP1-1_DMSO_1	sgKEAP1-1_DMSO_2	sgKEAP1-1_DMSO_3	sgKEAP1-1_DMSO_4	sgKEAP1-2_DMSO_1	sgKEAP1-2_DMSO_2	sgKEAP1-2_DMSO_3	sgKEAP1-2_DMSO_4	No inf_Tram_1	No inf_Tram_2	No inf_Tram_3	No inf_Tram_4	sgGFP_Tram_1	sgGFP_Tram_2	sgGFP_Tram_3	sgGFP_Tram_4	sgKEAP1-1_Tram_1	sgKEAP1-1_Tram_2	sgKEAP1-1_Tram_3	sgKEAP1-1_Tram_4	sgKEAP1-2_Tram_1	sgKEAP1-2_Tram_2	sgKEAP1-2_Tram_3	sgKEAP1-2_Tram_4		Sample Type	sgCTRL_no drug/sgCTRL_no drug	t test	stdev		sgKEAP1_no drug/sgCTRL_no drug	t test	stdev		sgCTRL_Tram/sgCTRL_No drug	t test	stdev		sgKEAP1_Tram/sgCTRL_no drug	t test	stdev
glyoxylate	106226	62142.8	73782.4	61588	95525.8	126889	104914	71830	82870.5	72400.5	89127.1	71505.8	91481.2	71493	86979.8	68031.7	68092.3	84644.1	55177.3	77849.2	97462.6	73412.6	72039.3	66501.1	76967.9	56817	69473.4	67893.7	63054.5	66300.3	44500.3			glyoxylate	1	1	0.385577		0.901822	0.358866	0.267951		0.846748	0.181841	0.272308		0.723546	0.181841	0.230107
glycolate	102122	82746.6	97260	106914	101318	97288.1	105118	105535	89159.9	80879.2	77483.5	107373	91834.7	46114.4	104666	68298.8	90659.1	96322.3	132140	120199	71327.3	88535.5	86629.8	72772.4	129365	108693	94916.4	105185	89847.7	118055	116743	93591.1		glycolate	1	1	0.110176		0.834033	0.0462813	0.210377		0.950248	0.54705	0.226724		1.07277	0.54705	0.162047
pyruvate	115068	74944.4	96441.6	65725.8	189459	100441	80340.4	133988	114868	79209.4	69178.6	101827	122965	77906.3	83168.9	67478.5	87641.2	181123	118789	148294	105295	101084	93357.8	76652.5	105991	81729.1	99987.5	102231	94004.5	105365	86093.3	61559.7		pyruvate	1	1	0.528173		0.836752	0.292306	0.369085		1.06519	0.71508	0.513574		0.860525	0.71508	0.35129
lactate	4.67773e+07	3.85268e+07	4.17253e+07	4.51272e+07	4.3394e+07	5.24511e+07	4.62582e+07	3.71938e+07	4.62802e+07	4.28305e+07	4.15279e+07	4.03207e+07	4.46261e+07	3.41107e+07	4.66512e+07	4.02234e+07	2.75321e+07	2.98155e+07	2.37373e+07	2.61228e+07	4.6926e+07	4.09692e+07	3.94845e+07	5.1077e+07	4.06173e+07	4.96995e+07	4.08595e+07	3.16687e+07	3.68536e+07	4.06743e+07	3.43724e+07	75746		lactate	1	1	0.15737		0.957653	0.421981	0.141202		0.812808	0.0604322	0.251017		0.781955	0.0604322	0.349233
2-oxobutanoate	245497	263810	248668	230587	277831	254572	236839	240505	234529	220706	207666	207709	218970	210096	215342	230639	245291	314122	234886	298964	265167	301824	296802	280794	259506	226304	227479	234961	247766	213215	283090	222667		2-oxobutanoate	1	1	0.086874		0.873568	0.000255675	0.0673444		1.11987	0.0207174	0.133719		0.958303	0.0207174	0.109067
acetoacetate	272303	246931	226121	235469	263803	279769	234853	231660	196679	200784	217556	225865	166590	188568	226107	195716	225702	275412	213373	277673	280060	275101	232307	241811	225061	277909	280533	225398	208351	206454	281457	218907		acetoacetate	1	1	0.116071		0.812627	0.000432129	0.10549		1.01533	0.75598	0.137617		0.966428	0.75598	0.155867
glycerate	535258	433610	442949	466340	422068	469657	643602	452835	574840	426202	341530	585658	487394	577931	597427	508321	556070	756464	553627	677439	487707	667084	652971	536856	571894	473451	594382	725395	648540	716500	648753	755922		glycerate	1	1	0.214591		1.06026	0.492687	0.247776		1.26431	0.00784523	0.268264		1.32809	0.00784523	0.279321
uracil	30378.2	24308.5		14828				10462.6	21706.5			11021.2	8017.34		17874.6	27244.4	18234.2	15147.7	20927	16456.5	22821.5	13314.5	24220.5	33487	30866.1	7675.2	16180.5	16507.2		15599.9	16887.3	22879.3		uracil	1	1	0.63786		0.858884	0.629944	0.550225		1.0291	0.899117	0.564801		0.90451	0.899117	0.54316
fumarate	5.36691e+06	4.948e+06	5.4457e+06	5.08863e+06	6.54527e+06	7.57607e+06	7.16033e+06	5.82733e+06	6.13118e+06	5.70227e+06	5.88983e+06	5.67796e+06	6.33758e+06	5.41938e+06	7.05287e+06	5.44155e+06	5.27481e+06	6.24938e+06	4.99291e+06	5.47502e+06	5.74524e+06	5.05628e+06	5.7384e+06	4.77187e+06	4.59494e+06	4.67497e+06	5.00998e+06	4.39796e+06	4.75695e+06	3.86197e+06	4.28884e+06	3.69287e+06		fumarate	1	1	0.232558		0.993627	0.924934	0.186973		0.902951	0.156549	0.169176		0.735609	0.156549	0.142318
Maleic acid	5.23844e+06	4.67134e+06	5.28283e+06	4.99829e+06	7.11947e+06	7.19591e+06	6.34788e+06	5.65358e+06	5.8859e+06	5.35835e+06	5.74973e+06	5.41517e+06	6.4952e+06	5.34135e+06	7.1616e+06	5.48642e+06	5.27635e+06	5.58444e+06	5.06446e+06	5.25804e+06	5.46631e+06	5.1863e+06	5.14741e+06	4.49257e+06	4.57129e+06	4.36075e+06	4.89375e+06	4.39066e+06	4.91651e+06	3.74486e+06	4.50627e+06	3.62151e+06		Maleic acid	1	1	0.234581		1.0083	0.908306	0.201297		0.891806	0.102481	0.15825		0.752683	0.102481	0.149267
2-keto-isovalerate	5.33838e+06	4.5804e+06	5.19455e+06	4.86156e+06	6.93761e+06	7.27214e+06	5.80717e+06	5.3688e+06	5.86956e+06	5.44588e+06	5.41105e+06	5.07963e+06	6.04943e+06	5.44894e+06	6.9941e+06	4.83353e+06	5.1366e+06	5.70152e+06	4.93045e+06	5.75351e+06	5.61881e+06	5.18025e+06	5.25337e+06	4.42185e+06	4.33617e+06	4.65356e+06	4.74858e+06	4.39272e+06	4.60072e+06	3.87111e+06	4.46077e+06	4.14354e+06		2-keto-isovalerate	1	1	0.239605		0.994963	0.945997	0.205891		0.925833	0.280512	0.175562		0.776162	0.280512	0.140952
Guanidoacetic acid	605967	539679	615267	527865	628945	628724	636017	587043	546940	528744	487922	682317	559339	514843	662271	598048	369693	547093	481904	485972	519948	553662	558112	556677	440761	529697	537823	500812	512887	385124	626619	523008		Guanidoacetic acid	1	1	0.0987141		0.960356	0.423943	0.13474		0.85398	0.00622406	0.123196		0.850555	0.00622406	0.133155
succinate	1.72382e+07	1.49307e+07	1.52911e+07	1.69249e+07	1.76126e+07	1.67438e+07	1.75135e+07	1.55512e+07	1.37932e+07	1.30485e+07	1.24898e+07	1.42577e+07	1.38673e+07	1.36663e+07	1.40713e+07	1.32332e+07	1.47645e+07	1.40393e+07	1.28906e+07	1.58749e+07	1.97071e+07	2.01661e+07	1.94149e+07	1.93692e+07	1.60939e+07	1.7768e+07	1.61019e+07	1.74384e+07	1.61639e+07	1.65867e+07	1.6103e+07	1.62819e+07		succinate	1	1	0.0910122		0.822629	8.36764e-06	0.0638533		1.03354	0.625283	0.190717		1.00555	0.625283	0.0762888
Methylmalonic acid	2.05797e+07	1.69845e+07	1.8185e+07	1.94223e+07	2.09345e+07	1.93414e+07	2.05993e+07	1.84771e+07	1.64202e+07	1.54331e+07	1.58218e+07	1.71967e+07	1.49623e+07	1.5971e+07	1.6614e+07	1.62381e+07	1.68837e+07	1.65103e+07	1.44988e+07	1.83775e+07	2.29649e+07	2.26172e+07	2.12723e+07	2.17686e+07	1.83575e+07	2.06559e+07	1.85524e+07	1.93366e+07	1.86026e+07	1.86676e+07	1.89673e+07	1.92368e+07		Methylmalonic acid	1	1	0.100898		0.832604	3.74547e-05	0.0695551		1.00239	0.970655	0.180694		0.986104	0.970655	0.079973
3-S-methylthiopropionate	17462.7	5964.06	20767.4	22499.4	20995.5	14123.2	14414.6	10143.9	8491.92	27810.9	17648	19028.8	19908.5	15230.1	16088.2	16294.7	26500.9	20505.1	11236.8	22285.2	18417.1	25438.2	18370.8	26974.8	19780.2	14145	21903.9	21674.2	15232.6	9991.26	30211.4	19320.1		3-S-methylthiopropionate	1	1	0.516279		1.11182	0.537379	0.530701		1.3431	0.0704065	0.593864		1.20486	0.0704065	0.585526
nicotinate	267022	240310	202235	121643	105571	274055	255567	269074	171503	180980	188557	206354	289493	189481	147329	196407	213199	200285	209077	97295.1	77844.6	185197	269931	189194	79730.8	95886.1	90595.2	165162	131501	257068	251868	198324		nicotinate	1	1	0.442333		0.90471	0.474824	0.341945		0.830908	0.281527	0.389915		0.731864	0.281527	0.400311
taurine	6.99652e+07	7.75968e+07	8.19508e+07	7.41723e+07	9.20342e+07	9.61415e+07	9.27353e+07	8.93522e+07	9.81635e+07	1.02243e+08	1.04549e+08	1.01526e+08	1.0837e+08	9.91623e+07	1.23413e+08	1.10156e+08	5.51907e+07	6.10619e+07	5.4366e+07	5.69701e+07	5.82485e+07	5.57168e+07	6.58955e+07	5.03761e+07	8.81742e+07	8.74389e+07	8.70772e+07	9.06719e+07	9.29951e+07	8.1445e+07	9.42413e+07	7.85051e+07		taurine	1	1	0.162411		1.25764	0.000261645	0.174157		0.679319	5.22599e-06	0.0956876		1.03947	5.22599e-06	0.135478
Pyroglutamic acid	4.24003e+06	3.48884e+06	3.93032e+06	3.90197e+06	4.30395e+06	3.85107e+06	4.33059e+06	3.84914e+06	3.1638e+06	3.32106e+06	3.22191e+06	3.64638e+06	2.93562e+06	3.14967e+06	4.2687e+06	3.63133e+06	3.36691e+06	3.10348e+06	2.823e+06	3.68047e+06	4.59509e+06	4.36671e+06	4.52521e+06	4.6375e+06	3.63448e+06	3.83636e+06	3.4613e+06	3.62833e+06	3.7214e+06	3.34378e+06	3.71021e+06	3.49324e+06		Pyroglutamic acid	1	1	0.101981		0.857115	0.00691743	0.122273		0.974995	0.725596	0.196838		0.903849	0.725596	0.0766422
Citraconic acid	1.94186e+06	1.94958e+06	1.98723e+06	1.89826e+06	2.28015e+06	2.25212e+06	2.1946e+06	2.09344e+06	1.63564e+06	1.79725e+06	1.69967e+06	1.85859e+06	1.75035e+06	1.85929e+06	2.03191e+06	1.89993e+06	2.04256e+06	2.5141e+06	2.24253e+06	2.77277e+06	2.01057e+06	2.36529e+06	2.32368e+06	1.95446e+06	1.89604e+06	2.02829e+06	2.12741e+06	1.98668e+06	2.06582e+06	1.61562e+06	2.10724e+06	1.50689e+06		Citraconic acid	1	1	0.103219		0.875606	0.00225554	0.0875849		1.09813	0.0908001	0.156367		0.923887	0.0908001	0.130906
2-ketohaxanoic acid	208767	175097	188951	184925	225753	234084	197391	168346	191041	151966	188678	216811	203485	154929	172641	203030	211524	234437	229423	282891	190086	204188	216241	190016	201020	182440	214026	216978	232016	215260	215126	224710		2-ketohaxanoic acid	1	1	0.167476		0.936378	0.301704	0.162582		1.11084	0.126842	0.201449		1.07469	0.126842	0.148458
N-Acetyl-L-alanine	3.39652e+06	3.91368e+06	3.63004e+06	4.13383e+06	5.14366e+06	4.87045e+06	5.23104e+06	5.47473e+06	4.82295e+06	4.25901e+06	4.35187e+06	4.63445e+06	4.58128e+06	4.69261e+06	4.96234e+06	4.5768e+06	3.64208e+06	3.69206e+06	3.8145e+06	3.95878e+06	5.19483e+06	5.16367e+06	5.24196e+06	5.21732e+06	4.23358e+06	4.32025e+06	4.14644e+06	4.29264e+06	4.32922e+06	4.36968e+06	4.07205e+06	4.25493e+06		N-Acetyl-L-alanine	1	1	0.25295		1.03038	0.651338	0.191301		1.00367	0.967235	0.248526		0.950406	0.967235	0.171455
oxaloacetate	1.35436e+06	1.25195e+06	1.27072e+06	1.35303e+06	1.49783e+06	1.32017e+06	1.34383e+06	1.24271e+06	1.123e+06	1.12341e+06	1.14545e+06	1.15897e+06	1.12468e+06	1.12644e+06	1.13458e+06	1.17011e+06	1.11683e+06	1.33638e+06	1.0396e+06	1.48782e+06	1.43411e+06	1.49016e+06	1.54037e+06	1.49934e+06	1.24666e+06	1.51264e+06	1.21614e+06	1.33242e+06	1.37174e+06	1.2509e+06	1.37094e+06	1.24518e+06		oxaloacetate	1	1	0.0869893		0.856322	1.52007e-05	0.0543989		1.02915	0.604415	0.156281		0.991726	0.604415	0.0964547
Hydroxyisocaproic acid	97889.3	77972.8	50202.3	92959.7	76554.8	102370	84768.1	91615.7	43301.9	88030.2	65375.4	75893.7	62560.2	64192.9	92163.6	85807.8	54893.7	91747.8	32173.5	110499	83324	108104	113621	125742	75545.3	99811.5	76888.7	50871.8	93195.2	70239.3	79125	36876.4		Hydroxyisocaproic acid	1	1	0.276603		0.856143	0.16258	0.256853		1.06788	0.6606	0.434209		0.863895	0.6606	0.297696
malate	3.18251e+07	2.99168e+07	3.1842e+07	2.99694e+07	4.08412e+07	4.13581e+07	3.75074e+07	3.33028e+07	3.49696e+07	3.26666e+07	3.35867e+07	3.41746e+07	3.7658e+07	3.41593e+07	4.04763e+07	3.72309e+07	3.19926e+07	3.51177e+07	3.29138e+07	3.68486e+07	3.28607e+07	3.04527e+07	3.46387e+07	2.83219e+07	2.94613e+07	2.96925e+07	2.94245e+07	2.789e+07	2.96088e+07	2.5706e+07	2.88648e+07	2.53204e+07		malate	1	1	0.191524		1.03023	0.590202	0.158695		0.95149	0.39526	0.150789		0.81706	0.39526	0.122122
hypoxanthine	1.96164e+06	1.43904e+06	1.42231e+06	1.5292e+06	1.76063e+06	1.3415e+06	2.00589e+06	1.66453e+06	1.20068e+06	1.16766e+06	1.12484e+06	1.2742e+06	1.24292e+06	1.35301e+06	1.03911e+06	1.27479e+06	1.08166e+06	952387	1.04936e+06	796957	1.83809e+06	2.13444e+06	2.24646e+06	2.20382e+06	1.4027e+06	1.53941e+06	1.869e+06	1.45714e+06	1.53876e+06	1.71571e+06	1.4263e+06	1.66282e+06		hypoxanthine	1	1	0.216518		0.737326	0.000483647	0.127915		0.937402	0.67266	0.406819		0.96092	0.67266	0.176958
anthranilate	30783.1	26074.7	42749.3	42880.2	41051.6	74492.4	29050.1	34196.5	30571.6	23436.6	30742.1	21640.6	45136.4	13433.4	26967.7	33966	62968	55908.2	34988	90840.4	38036.1	64533.7	38021	38315.5	54929.8	44434.5	21979.7	35277.7	29390.4	34665.6	48542	36743.2		anthranilate	1	1	0.538834		0.703113	0.0813223	0.355612		1.31852	0.166426	0.698634		0.952331	0.166426	0.448996
p-aminobenzoate	45993.1	64342.1	39164.1	19442.4	56619	48404.5	28165.5	24698.2	35524.6	26573.8	20330.9	6747.29	49192.9	23135.7	32820.7	41687.3	33486.5	53231.9	47671.6	61052	55628.8	39377.7	64688.5	67653.7	36420.4	40884.5	29198.8	57163.2	34835.7	16784.9	34490.7	39999.3		p-aminobenzoate	1	1	0.549983		0.72213	0.143303	0.429572		1.29361	0.11103	0.583267		0.886633	0.11103	0.443277
p-hydroxybenzoate	353437	254455	332900	425907	380718	384536	313345	327206	262322	320236	239391	355215	226798	191368	437409	306002	334548	356364	286944	410274	372970	566431	289767	651244	267153	344357	357467	267014	372614	220452	353961	197674		p-hydroxybenzoate	1	1	0.213157		0.843548	0.129001	0.262086		1.17891	0.237369	0.420611		0.858679	0.237369	0.235067
acetylphosphate	1.97194e+06	1.44249e+06	1.8659e+06	1.62385e+06	1.74751e+06	1.61855e+06	1.53285e+06	1.12469e+06	1.52491e+06	1.89778e+06	1.57903e+06	1.14449e+06	1.71546e+06	1.71796e+06	1.73055e+06	1.36061e+06	2.39394e+06	2.14787e+06	2.17914e+06	2.31232e+06	1.33778e+06	1.64728e+06	1.42804e+06	1.03899e+06	1.76721e+06	1.59091e+06	1.66537e+06	1.73955e+06	1.48162e+06	1.91994e+06	1.74974e+06	1.95492e+06		acetylphosphate	1	1	0.230335		0.980122	0.802215	0.217856		1.12048	0.354857	0.365527		1.07283	0.354857	0.200077
Carbamoyl phosphate	1.09814e+07	1.59004e+07	1.42926e+07	1.49023e+07	5.31663e+06	6.01417e+06	5.65824e+06	6.62866e+06	4.44923e+06	3.85499e+06	4.28793e+06	5.09618e+06	3.63173e+06	3.43859e+06	4.5496e+06	4.04312e+06	2.08422e+07	2.25229e+07	2.09672e+07	1.9867e+07	5.13574e+06	5.18334e+06	6.44799e+06	4.90041e+06	2.41297e+06	2.31947e+06	2.48375e+06	1.92177e+06	2.26511e+06	2.11806e+06	2.92355e+06	2.43129e+06		Carbamoyl phosphate	1	1	0.648926		0.41849	0.00313937	0.199506		1.32841	0.349642	1.04043		0.236854	0.349642	0.112599
a-ketoglutarate	4.80004e+06	5.8467e+06	5.1925e+06	6.60916e+06	6.48158e+06	6.28981e+06	7.12595e+06	7.79655e+06	6.04965e+06	5.47454e+06	5.32961e+06	7.1916e+06	6.16195e+06	6.04933e+06	6.66399e+06	6.59645e+06	6.2574e+06	6.32281e+06	6.23727e+06	7.14139e+06	8.41517e+06	7.99912e+06	7.80762e+06	8.64229e+06	6.03299e+06	7.54823e+06	6.255e+06	6.76029e+06	6.53066e+06	6.23396e+06	6.43605e+06	6.66181e+06		a-ketoglutarate	1	1	0.221141		0.987532	0.851545	0.183334		1.17312	0.0455563	0.242862		1.0462	0.0455563	0.1797
Phenylpropiolic acid	2.52719e+06	2.09337e+06	2.1671e+06	2.1752e+06	3.01842e+06	2.72668e+06	2.76454e+06	2.49264e+06	2.33766e+06	2.32103e+06	2.31667e+06	2.35742e+06	2.5897e+06	2.65889e+06	2.86225e+06	2.69017e+06	1.65794e+06	1.88651e+06	1.58871e+06	1.84978e+06	2.36183e+06	2.37724e+06	2.31592e+06	2.10569e+06	2.37675e+06	2.48411e+06	2.48438e+06	2.12708e+06	2.42198e+06	2.18532e+06	2.33842e+06	2.3549e+06		Phenylpropiolic acid	1	1	0.188242		1.00845	0.881695	0.158575		0.80859	0.0106995	0.166476		0.940286	0.0106995	0.13561
2-oxo-4-methylthiobutanoate	10617.2	19786.5	20544.1	18859.4	24637.7	24778.8	25447.2	18123.1	12479.5	13513.7	11427.3	14994.9	20728.9	17034.4	13448.6	18731.6	17785.5	13951.5	11620	7058.84	8698.02	11958.2	27235.8	18408.7	5912.49	13777.7	8685.84	14952.6	7929.89	27871.7	25070.6	13337.7		2-oxo-4-methylthiobutanoate	1	1	0.338681		0.751617	0.0285517	0.240628		0.716958	0.0637789	0.360999		0.722007	0.0637789	0.427481
2-Hydroxy-2-methylbutanedioic acid	1.17047e+06	1.033e+06	1.09252e+06	979794	1.21851e+06	1.19005e+06	1.26512e+06	1.16868e+06	1.03063e+06	994160	871574	916717	870637	948344	1.01762e+06	860473	921263	1.17769e+06	936253	1.08853e+06	1.12834e+06	1.17117e+06	1.16e+06	1.14708e+06	1.07957e+06	1.00559e+06	1.0635e+06	1.06671e+06	1.1167e+06	998615	1.03216e+06	961397		2-Hydroxy-2-methylbutanedioic acid	1	1	0.119972		0.823651	0.000293598	0.0926068		0.95747	0.351161	0.122295		0.912933	0.351161	0.0892233
3-methylphenylacetic acid	121486	90202.1	84133.7	137456	150013	162429	167431	117887	129335	107342	92897.8	97009.5	61628.9	62725.7	93570.2	87169.2	128750	112091	77887.4	100113	121474	157856	76010.9	123463	108976	125682	94493.5	61900	123730	89729.9	82796.4	99375.5		3-methylphenylacetic acid	1	1	0.34215		0.709652	0.0152189	0.243349		0.870623	0.273988	0.298544		0.763001	0.273988	0.24758
xanthine	7.93485e+06	5.01118e+06	6.48079e+06	8.82661e+06	1.05729e+07	9.3936e+06	9.92257e+06	8.37819e+06	5.31411e+06	5.56669e+06	6.17009e+06	1.00372e+07	4.64814e+06	4.72798e+06	9.13313e+06	7.2302e+06	4.18578e+06	3.77823e+06	2.52986e+06	3.62765e+06	8.50941e+06	1.4081e+07	7.62233e+06	1.78894e+07	5.31879e+06	6.04758e+06	5.53843e+06	4.25774e+06	6.4659e+06	5.00317e+06	4.36226e+06	4.5604e+06		xanthine	1	1	0.311861		0.794152	0.0985387	0.300459		0.935402	0.798945	0.699465		0.624682	0.798945	0.168068
Hydroxyphenylacetic acid	123086	98185.8	110212	135167	157018	165417	145375	147018	117500	123873	120281	121721	77940	81033	105920	108994	136376	108705	158804	193676	143202	158604	115267	138402	145279	136530	121570	91990.5	139033	90082.3	108779	70511		Hydroxyphenylacetic acid	1	1	0.24289		0.792675	0.0176443	0.191326		1.06617	0.488087	0.270363		0.835684	0.488087	0.246481
2,3-dihydroxybenzoic acid	996997	755755	822519	1.03687e+06	1.14179e+06	1.15559e+06	1.20237e+06	1.17428e+06	851123	855889	843918	720388	568892	431794	720082	755533	1.60634e+06	1.92476e+06	1.31802e+06	2.47497e+06	1.04424e+06	1.23074e+06	941866	1.05015e+06	1.16708e+06	1.18367e+06	1.19388e+06	1.11635e+06	1.29749e+06	1.11008e+06	1.10261e+06	1.02786e+06		2,3-dihydroxybenzoic acid	1	1	0.22959		0.69364	0.00137037	0.183686		1.39885	0.0533302	0.557717		1.11016	0.0533302	0.196148
orotate	846792	696525	889794	911387	998327	1.06045e+06	986826	1.13056e+06	879362	779684	661540	717896	524376	563837	707506	700391	1.3151e+06	1.6644e+06	1.13914e+06	1.93044e+06	986648	1.13751e+06	870520	948161	993853	1.16301e+06	1.0118e+06	1.00975e+06	1.10683e+06	911783	1.03324e+06	860363		orotate	1	1	0.203206		0.735918	0.00134583	0.160015		1.32859	0.0444295	0.439293		1.07579	0.0444295	0.185744
dihydroorotate	384022	322507	309310	413806	445834	545916	410286	416489	323778	332510	266590	289883	201172	192530	276683	258705	485705	522817	378893	715969	421995	536319	313033	456848	394615	476402	374844	371097	494816	333636	409817	409217		dihydroorotate	1	1	0.257156		0.659402	0.000648158	0.173325		1.17961	0.167988	0.367445		1.00501	0.167988	0.225981
allantoin	1.1936e+06	895595	1.0549e+06	975812	1.19615e+06	969745	1.11834e+06	989682	806599	796215	891249	987753	1.05121e+06	682628	879950	909635	561489	392478	415729	433370	1.00498e+06	1.12055e+06	1.24207e+06	1.52076e+06	740892	837913	764794	799546	878543	1.07019e+06	725185	753399		allantoin	1	1	0.14948		0.834572	0.00834544	0.140954		0.797185	0.205767	0.427574		0.782774	0.205767	0.135857
Aminoadipic acid	707188	799187	728033	716685	1.04411e+06	987318	927014	758238	728645	733600	658080	783902	843860	662921	913305	808993	834462	820898	897182	900526	834738	839067	897128	916192	767942	907257	849387	818328	874001	783628	871071	673853		Aminoadipic acid	1	1	0.226129		0.919844	0.256983	0.181301		1.04086	0.498825	0.172716		0.981658	0.498825	0.180926
Indole-3-carboxylic acid	808886	625974	752033	731031	899334	881390	823789	641792	643977	725254	695948	746342	774571	618726	807343	750164	889528	943701	823943	890791	828343	744461	924152	824203	722925	915128	865357	802203	905451	713112	791031	694020		Indole-3-carboxylic acid	1	1	0.186864		0.9348	0.257453	0.148993		1.11435	0.0584597	0.169897		1.03975	0.0584597	0.178139
phenylpyruvate	12471.2	5593.88	8819.73	13468.6	22824.7	19522.9	21119.3	9327.84	16046.2	12305.1	13366.7	23716.9	11523.5	6086.13	21520.5	13393.2	15298.2	17577.6	39874.2	19059.8	12791.4	11453.6	8684	14311.4	22724.3	24442.5	18242.6	10575.4	13458.5	6411.69	16287	22646.7		phenylpyruvate	1	1	0.633346		1.04251	0.844026	0.61427		1.22892	0.441418	0.877631		1.19126	0.441418	0.700129
Atrolactic acid	119887	72490.9	71013.9	106488	95780.2	85739.9	84631	94401	72544.1	91774.7	80810.3	94344	65432.7	54499.4	106335	79424	63132.3	36307.8	36781.8	36100.2	67742.7	93822.4	82301.7	116578	72757.6	66401.1	41426.9	60947.2	61206.2	60228.8	45499	72443		Atrolactic acid	1	1	0.256409		0.883263	0.220728	0.243155		0.729387	0.0598419	0.35263		0.658391	0.0598419	0.173056
Phenyllactic acid	93719.6	54375.9	46657.8	107919	85898.7	103538	139413	102044	64850.2	72866.8	75758.5	157099	76902.6	80663.5	119150	88379.7	90991.8	64780.8	51836.6	83549.8	99913.5	176809	127287	177338	76364.2	116190	60398.3	54433.5	86394.5	69633.3	72683.6	60715.8		Phenyllactic acid	1	1	0.460713		1.00287	0.986443	0.469861		1.1894	0.397005	0.648033		0.813578	0.397005	0.340802
quinolinate	309974	231265	206101	283386	331676	260292	307705	259682	217103	192228	272335	262415	172968	208342	234365	240851	240893	289627	220942	241094	334727	347678	286782	345987	240772	269260	223794	245791	306867	237236	274531	272912		quinolinate	1	1	0.21981		0.822164	0.0241398	0.178244		1.05372	0.540055	0.247354		0.945701	0.540055	0.176732
phosphoenolpyruvate	265395	231692	265390	198218	490554	273472	301858	598730	443736	523905	598991	381762	475150	583732	574990	1.32164e+06	243491	225113	246926	396482	397975	408601	158823	280393	516703	484377	484299	206625	475326	309290	428160	1.12972e+06		phosphoenolpyruvate	1	1	0.603619		1.86794	0.0275401	1.20408		0.898105	0.584408	0.479309		1.53677	0.584408	1.06169
Uric acid	2.72961e+06	2.08171e+06	2.36245e+06	2.36562e+06	2.49796e+06	2.23784e+06	2.6975e+06	2.18665e+06	1.74077e+06	1.92772e+06	2.00236e+06	1.76082e+06	1.79947e+06	1.86612e+06	1.62849e+06	1.6411e+06	1.83777e+06	1.82526e+06	1.48291e+06	1.94796e+06	2.31177e+06	2.92814e+06	2.67145e+06	2.81564e+06	1.98042e+06	2.31841e+06	2.11199e+06	2.16647e+06	2.07082e+06	2.0585e+06	2.07165e+06	2.28868e+06		Uric acid	1	1	0.137991		0.749862	1.89711e-05	0.0915005		0.930142	0.429642	0.240278		0.89079	0.429642	0.0998083
dihydroxy-acetone-phosphate	1.18664e+07	1.25071e+07	1.23497e+07	1.2424e+07	1.6027e+07	1.48399e+07	1.37323e+07	1.16542e+07	1.52502e+07	1.44555e+07	1.49679e+07	1.43388e+07	1.69284e+07	1.33029e+07	1.7728e+07	1.54211e+07	9.79037e+06	1.23161e+07	9.97487e+06	1.23538e+07	1.1601e+07	1.02915e+07	9.18664e+06	7.47312e+06	1.3284e+07	1.44608e+07	1.3243e+07	1.13337e+07	1.32127e+07	1.14127e+07	1.27067e+07	1.01472e+07		dihydroxy-acetone-phosphate	1	1	0.166946		1.16122	0.0129988	0.174814		0.787353	0.00373706	0.157198		0.946872	0.00373706	0.154
D-glyceraldehdye-3-phosphate	9.41275e+06	1.08477e+07	1.03633e+07	1.08486e+07	1.26815e+07	1.14024e+07	1.10442e+07	9.00211e+06	1.31459e+07	1.18471e+07	1.2856e+07	1.12597e+07	1.44097e+07	1.17143e+07	1.46405e+07	1.21097e+07	8.35544e+06	1.11758e+07	8.25339e+06	1.01419e+07	9.36586e+06	8.06932e+06	7.3496e+06	6.00037e+06	1.2308e+07	1.26248e+07	1.09056e+07	1.03343e+07	1.17007e+07	9.85447e+06	1.0262e+07	8.84446e+06		D-glyceraldehdye-3-phosphate	1	1	0.151808		1.19135	0.00427096	0.173489		0.802682	0.00942747	0.174235		1.01439	0.00942747	0.162369
sn-glycerol-3-phosphate	3.00643e+06	3.43041e+06	3.33037e+06	3.53028e+06	3.1681e+06	3.05194e+06	2.89308e+06	2.5257e+06	2.2381e+06	2.01268e+06	2.08184e+06	1.97711e+06	2.57187e+06	1.97896e+06	2.50167e+06	2.59007e+06	4.67527e+06	5.55395e+06	5.04026e+06	4.43033e+06	2.83254e+06	2.53032e+06	2.68291e+06	1.97311e+06	2.81876e+06	2.81058e+06	2.34846e+06	2.06219e+06	2.44505e+06	2.58378e+06	2.80473e+06	2.63652e+06		sn-glycerol-3-phosphate	1	1	0.146856		0.719927	4.24068e-05	0.114721		1.19178	0.244965	0.452002		0.822498	0.244965	0.121128
shikimate	1.14233e+07	5.88972e+06	6.20644e+06	6.37449e+06	7.95058e+06	7.48828e+06	7.99291e+06	7.21533e+06	7.81609e+06	7.30405e+06	6.94609e+06	7.36116e+06	8.48322e+06	7.60314e+06	7.73313e+06	7.44578e+06	4.97222e+06	6.43981e+06	5.95594e+06	5.80359e+06	9.13607e+06	7.96689e+06	9.44275e+06	9.05373e+06	1.12573e+07	1.0487e+07	1.11119e+07	1.01006e+07	1.17131e+07	1.15448e+07	1.04802e+07	1.15737e+07		shikimate	1	1	0.32687		1.0025	0.976757	0.239331		0.970762	0.804515	0.323108		1.45799	0.804515	0.346285
aconitate	821661	906635	907390	911092	825842	954897	920426	709552	731963	752596	798079	668512	660406	628323	721837	610858	878198	1.17197e+06	988159	1.02595e+06	1.00897e+06	943440	866986	816807	854756	998407	674606	788647	913949	940041	610251	592960		aconitate	1	1	0.129228		0.800945	0.000296819	0.104479		1.10679	0.0771798	0.16417		0.916079	0.0771798	0.197584
allantoate	458663	392613	460261	476422	649998	677672	673269	380629	392665	362805	434414	397885	342357	375613	440537	378714	325545	282031	277320	363096	428414	430883	425915	413695	338827	408037	345759	330038	297730	378944	315476	313611		allantoate	1	1	0.340334		0.749483	0.013011	0.191586		0.70677	0.00865025	0.212041		0.654372	0.00865025	0.172391
Ascorbic acid	236152	263616	209881	173335	211641	218350	171380	155785	173891	187333	162154	113089	157107	139050	135220	166298	284785	353758	150905	319355	269587	247851	175732	204579	230207	276783	201233	153915	279135	218433	132245	135111		Ascorbic acid	1	1	0.250176		0.752461	0.00519298	0.176797		1.2234	0.123657	0.405369		0.992026	0.123657	0.336453
2-Isopropylmalic acid	248597	204103	208399	297378	324797	281091	324475	288588	226770	250027	230635	268881	254474	223443	284790	246666	279269	263888	221087	302089	346742	346814	224556	294505	248023	297754	259813	236325	302736	222776	244788	212147		2-Isopropylmalic acid	1	1	0.246429		0.911941	0.21349	0.177221		1.04663	0.603701	0.254092		0.929704	0.603701	0.201645
N-carbamoyl-L-aspartate-nega	462300	449384	434057	472307	568400	594340	683016	446987	391881	361671	364708	369165	340977	417158	422316	339533	315904	337063	279035	310324	472592	445774	482716	405615	354786	392031	358228	394644	331022	358328	384193	338397		N-carbamoyl-L-aspartate-nega	1	1	0.249327		0.731589	0.00115936	0.142961		0.741712	0.00780849	0.203712		0.70829	0.00780849	0.133309
Pyrophosphate	2.07315e+07	1.53846e+07	2.11318e+07	1.95031e+07	1.62505e+07	1.79209e+07	1.69357e+07	8.55008e+06	1.17759e+07	1.62273e+07	1.3803e+07	9.94218e+06	1.53832e+07	8.02488e+06	1.13265e+07	9.76112e+06	2.98467e+07	2.487e+07	2.43352e+07	2.64412e+07	1.39089e+07	1.88549e+07	1.28711e+07	1.42134e+07	1.56707e+07	1.48812e+07	1.50527e+07	1.4744e+07	1.43494e+07	1.85587e+07	1.65803e+07	1.12661e+07		Pyrophosphate	1	1	0.332744		0.705559	0.012233	0.236881		1.21211	0.204102	0.478327		0.887799	0.204102	0.241513
glucono-?-lactone	34033.8	43841.3	44807.4	34666.6	41711.5	41904	54923.1	15484.2	50762.2	58071.9	36778.6	49482.1	46560.2	39379.8	47916.4	44807.6	51271.5	34104.8	42922.5	32498.7	39301.7	37230.5	43204.3	47596.5	35791	33244.9	99661.9	43790.4	39411.6	25949.6	55741	45082.7		glucono-?-lactone	1	1	0.417205		1.20036	0.118816	0.393312		1.05382	0.660097	0.352733		1.21614	0.660097	0.689632
myo-inositol	7.61743e+07	6.93849e+07	7.16873e+07	7.3257e+07	8.27826e+07	8.09931e+07	8.04532e+07	7.42924e+07	6.54382e+07	5.81154e+07	6.14469e+07	6.23852e+07	7.02712e+07	6.44809e+07	7.05751e+07	6.80456e+07	7.37922e+07	7.56578e+07	7.09665e+07	7.31716e+07	7.41609e+07	7.26415e+07	7.60575e+07	7.54592e+07	6.43801e+07	6.44539e+07	6.36669e+07	6.07726e+07	6.52952e+07	6.83969e+07	6.5737e+07	6.86883e+07		myo-inositol	1	1	0.0897707		0.85507	0.000295597	0.079268		0.971894	0.257974	0.0657385		0.856108	0.257974	0.0639039
hydroxyphenylpyruvate	1.35347e+06	1.26145e+06	1.22775e+06	1.43376e+06	1.53646e+06	1.46645e+06	1.56043e+06	1.51233e+06	1.35204e+06	1.1964e+06	1.39381e+06	1.50443e+06	1.40193e+06	1.38948e+06	1.50385e+06	1.41061e+06	1.53746e+06	1.59005e+06	1.46729e+06	1.78272e+06	1.92079e+06	1.87921e+06	1.77183e+06	1.90651e+06	1.50946e+06	1.82608e+06	1.55174e+06	1.56066e+06	1.58275e+06	1.4533e+06	1.75248e+06	1.61997e+06		hydroxyphenylpyruvate	1	1	0.125311		0.982421	0.663245	0.110543		1.22055	0.00114098	0.165241		1.13252	0.00114098	0.133232
homocysteic acid	32887.7	31636	30048.1	28626.3	48992	48881.4	42784.3	45731	64514.8	50804.3	31147.2	36869	63909.1	69784.5	35428.5	33676.2	16545.7	46841.6	38583.2	35124.2	64210.2	26158	41036.7	18887.2	38245.1	21464.7	24489.7	42502.5	18968	47314.7	79893	11574.9		homocysteic acid	1	1	0.3197		1.24725	0.158842	0.499187		0.928291	0.668216	0.455598		0.918813	0.668216	0.600732
4-Pyridoxic acid	90206.6	93633.1	64116.1	70835.1	78668.9	57195.6	77469.2	69285.9	61254	39034.7	48180.9	38383.5	39033.1	58786.5	83301	67780.4	50753.2	85519.1	80398.5	83122.2	71441.4	75964.5	64310	66797.4	75777	75010.2	40322.8	54888.1	114078	68628.6	71106.5	62946.9		4-Pyridoxic acid	1	1	0.234012		0.724553	0.012545	0.247155		0.961584	0.637483	0.220966		0.935731	0.637483	0.322354
3-phosphoglycerate	1.45738e+06	1.86626e+06	1.94493e+06	1.89114e+06	2.51809e+06	2.2464e+06	2.49022e+06	1.74827e+06	3.75527e+06	2.77506e+06	3.22369e+06	3.69434e+06	2.52949e+06	2.17598e+06	3.56407e+06	2.9237e+06	1.58044e+06	1.71376e+06	1.9356e+06	1.98498e+06	1.95428e+06	1.91369e+06	1.86403e+06	1.84954e+06	2.57436e+06	2.38894e+06	2.32725e+06	1.9623e+06	2.24941e+06	1.84738e+06	2.49454e+06	3.79482e+06		3-phosphoglycerate	1	1	0.258781		1.5246	0.000631672	0.39905		0.915462	0.240788	0.180771		1.21508	0.240788	0.369375
Indoleacrylic acid	278918	242341	233145	220029	299942	315158	267261	212911	242081	205189	228864	238323	206585	192511	256823	237064	229675	263290	186221	264872	298297	311641	270548	273409	254148	306281	234029	208615	227324	198505	241518	229119		Indoleacrylic acid	1	1	0.205398		0.873285	0.0517029	0.152945		1.01365	0.856793	0.21139		0.917782	0.856793	0.184158
Kynurenic acid	1.12755e+06	878316	940423	950245	1.348e+06	1.07467e+06	982853	1.0052e+06	831926	647126	573973	646553	715739	749219	924205	783744	363447	389644	366581	473500	372324	333381	398607	406750	334000	333365	295818	295573	305066	234811	339243	355521		Kynurenic acid	1	1	0.200886		0.70691	0.000389176	0.148173		0.373677	9.30678e-09	0.066455		0.300147	9.30678e-09	0.0561934
citrate-isocitrate	4.12334e+07	4.40288e+07	4.63506e+07	4.49888e+07	5.3509e+07	4.828e+07	5.01229e+07	4.71025e+07	4.21388e+07	3.92232e+07	4.00146e+07	4.81976e+07	4.10379e+07	4.01455e+07	4.83207e+07	4.45497e+07	4.30942e+07	4.60808e+07	4.91008e+07	5.19788e+07	5.72242e+07	5.88237e+07	5.11894e+07	6.0436e+07	4.87433e+07	4.88051e+07	5.06634e+07	4.91557e+07	4.49104e+07	4.02995e+07	4.9692e+07	4.45996e+07		citrate-isocitrate	1	1	0.114014		0.914839	0.0496373	0.10727		1.11265	0.0582296	0.15941		1.00334	0.0582296	0.110233
isocitrate	258363	239339	245988	183488	226847	337215	272299	239706	206219	213753	209391	196739	222198	212738	234682	176641	221908	256213	251234	275457	288771	237860	263856	213746	229465	238633	233227	246038	234051	248483	156077	126799		isocitrate	1	1	0.246805		0.834826	0.0259322	0.161105		1.0029	0.968301	0.202898		0.854999	0.968301	0.236571
citrate	1.75894e+07	2.36255e+07	2.12139e+07	2.208e+07	2.16177e+07	2.36647e+07	2.36245e+07	2.10169e+07	1.73848e+07	1.71494e+07	1.91145e+07	1.9934e+07	1.84009e+07	2.00013e+07	2.15859e+07	1.8987e+07	2.0038e+07	2.34385e+07	2.12673e+07	2.31308e+07	2.49222e+07	2.5782e+07	2.66881e+07	2.74294e+07	2.11619e+07	2.29685e+07	1.9915e+07	2.19639e+07	1.93618e+07	2.06032e+07	2.25237e+07	1.7199e+07		citrate	1	1	0.131871		0.874595	0.00799728	0.105531		1.1047	0.0704544	0.15745		0.94992	0.0704544	0.123873
2-dehydro-D-gluconate	141004	135563	139870	149973	154058	114177	139728	119873	96794.6	96671.7	125317	110261	107535	117794	109009	99872.7	111063	98651.2	96290.8	122155	162730	148770	149779	170311	148170	136802	143766	122881	146943	131312	139922	154416		2-dehydro-D-gluconate	1	1	0.141272		0.788904	0.000284165	0.108276		0.968474	0.710143	0.233754		1.02738	0.710143	0.126417
D-gluconate	2.07923e+06	1.78908e+06	1.95456e+06	1.58894e+06	2.32376e+06	2.12248e+06	1.62288e+06	1.69967e+06	2.18467e+06	1.8237e+06	2.0893e+06	2.39218e+06	2.17931e+06	2.27735e+06	2.1616e+06	2.25885e+06	1.70145e+06	1.69234e+06	1.8836e+06	1.77354e+06	1.80356e+06	1.86756e+06	1.95786e+06	1.77182e+06	2.28198e+06	2.41976e+06	2.23325e+06	2.20879e+06	2.40579e+06	2.01664e+06	2.18505e+06	2.17168e+06		D-gluconate	1	1	0.197203		1.14402	0.0269952	0.182232		0.951987	0.373099	0.141283		1.18065	0.373099	0.178525
D-erythrose-4-phosphate	408984	464302	426887	413505	526277	527165	431864	337112	452108	406630	417327	422144	423952	393691	556125	428334	419883	437802	496698	406546	350612	336700	287257	292213	395170	424316	349469	406895	330063	363000	389323	342696		D-erythrose-4-phosphate	1	1	0.202671		0.98988	0.878412	0.182579		0.85623	0.0861562	0.207482		0.848657	0.0861562	0.143467
Xanthurenic acid	231561	214765	215751	213486	228632	251527	190425	258420	208910	190995	162530	190164	153991	181323	202898	188309	281751	417449	407557	379536	209335	290464	258681	214091	213886	264334	228580	274145	275186	241791	256493	224316		Xanthurenic acid	1	1	0.138022		0.819653	0.00135722	0.115174		1.36258	0.0181497	0.393981		1.09651	0.0181497	0.149659
lipoate		5328.3	4613.06	4027.06	8230.94	9077.55	4494.42	2796.38	3936.89	4666.49		6023.53	7455.62	4309.42	3741.27	4584.79	2703.29						5464.28		5817.68		3451.51		4957.31		3775.08	2877.71		lipoate	1	1	0.588709		0.900183	0.59289	0.445306		0.741203	0.454848	0.469852		0.757914	0.454848	0.382484
D-glucarate	73865.6	72966.6	69846.6	72837.2	53399.9	106045	79461.3	84931	55774.6	39653	82701.3	72523.6	68524.9	63173	64764.7	45452.8	56606.1	80516.2	68129.7	91914.3	76587.2	70433.9	59671.3	72290.1	69824.7	77290	58381.1	93250.3	87316.4	80091.3	86788.5	78844.4		D-glucarate	1	1	0.27565		0.803074	0.0568924	0.24199		0.939343	0.494379	0.235188		1.03005	0.494379	0.246735
deoxyribose-phosphate	588636	785240	692332	594808	697252	711847	659672	582154	705985	719428	711471	634456	775930	677418	734588	646785	951724	1.24567e+06	1.16419e+06	1.38691e+06	706669	704378	647872	463517	773865	728569	736194	695605	649728	683864	782572	662197		deoxyribose-phosphate	1	1	0.152913		1.05537	0.244228	0.133893		1.36879	0.0589047	0.517261		1.07542	0.0589047	0.138009
pantothenate	1.20078e+07	1.03939e+07	9.92317e+06	1.2059e+07	1.46597e+07	1.06898e+07	1.71163e+07	1.02739e+07	1.33596e+07	1.12336e+07	1.2911e+07	1.61922e+07	1.27566e+07	8.56985e+06	2.12155e+07	1.77576e+07	6.43436e+06	4.74497e+06	4.13624e+06	3.92868e+06	7.5024e+06	9.89027e+06	1.50717e+07	1.28571e+07	7.16597e+06	7.74753e+06	6.50049e+06	8.1976e+06	9.04295e+06	8.97376e+06	6.07093e+06	9.53032e+06		pantothenate	1	1	0.294313		1.17372	0.226234	0.408693		0.664779	0.0333597	0.370568		0.651022	0.0333597	0.170551
prephenate			2965.82		3934.76		3208.44	3145.46			3651.2	2855.72	9585.91		3367.28						2644.63		6561.54	3236.95			2301.72	2759.19						prephenate	1	1	0.182094		1.46819	0.36871	0.973505		1.25171	0.463257	0.65723		0.763653	0.463257	0.138558
deoxyuridine	1973.26	2835.43	6355.47	7489.72	5811.23		8103.01	2346.16	4569.14	9305.34			8038.36						8836.61	6822.18		3858.72		1804.6	3050.57					4785.58				deoxyuridine	1	1	0.724834		1.46444	0.221289	0.897237		1.06872	0.847081	0.83076		0.785539	0.847081	0.471807
ribose-phosphate	4.69577e+06	4.91925e+06	4.9742e+06	5.20599e+06	5.62334e+06	5.36506e+06	5.25881e+06	4.45876e+06	6.14832e+06	5.51339e+06	5.70739e+06	5.57227e+06	5.84808e+06	5.71544e+06	7.24402e+06	5.76361e+06	4.0614e+06	4.50374e+06	4.03279e+06	4.09499e+06	4.59594e+06	4.26082e+06	4.52359e+06	3.82707e+06	4.86739e+06	6.20722e+06	5.55223e+06	5.11982e+06	5.6011e+06	4.83256e+06	6.13346e+06	5.4653e+06		ribose-phosphate	1	1	0.105186		1.17311	0.00253465	0.141082		0.837021	0.000201077	0.0830946		1.08093	0.000201077	0.130584
thymidine		2824.85	9226.22	9392.61	4290.54	3263.06	7865.14	4164.77	10051.8	6533.19	5916.21	1611.67	2838.87	4675.88	5986.67		6292.44	7817.96	3305.37	3200.19	5123.23	8582.49	2179.92	4526.93	4645.73	11837.7	3820.91		12258.9	3918.22	6710.53			thymidine	1	1	0.690423		0.916815	0.75023	0.646913		0.875029	0.59093	0.578591		1.22823	0.59093	0.895734
uridine	44460	17799.8	42598.5	31347.5	23827.1	52490.5	35691.1	20563.5	43705.6	28914.5	36885.1	41230.3	32747.1	22057.4	46672.6	36260.3	45922.7	34804.7	7546.8	26944.1	42298.6	42298.6	29848.1	37677.9	46726.7	24409.8	69094.7	16761.2	69067.3	40482.2	53741.7	69595.6		uridine	1	1	0.522923		1.07328	0.645647	0.463991		0.994655	0.977229	0.51883		1.45056	0.977229	0.814933
deoxyinosine	6925.05	14414.5	8112.54	33043.1	19549	31676.8	17440.9	14234.5	11993.5	15964.4	18728.3	13155.4	8510.43	11950	18307.3	15688.1	23428.1	20091	20770.2	20390.8	25273.6	10708.8	23508.1	15806.4	18548.3	9915.23	22349.4	22862.8	13342.6	11635.3	8807.99	9030.47		deoxyinosine	1	1	0.757438		0.786108	0.305894	0.463117		1.10028	0.641173	0.644185		0.801203	0.641173	0.536917
shikimate-3-phosphate																																		shikimate-3-phosphate	#DIV/0!	#DIV/0!	#DIV/0!		#DIV/0!	#DIV/0!	#DIV/0!		#DIV/0!	#DIV/0!	#DIV/0!		#DIV/0!	#DIV/0!	#DIV/0!
D-glucono-?-lactone-6-phosphate	133398	128926	145392	141843	123453	157350	145827	118077	167943	161289	123172	158496	166485	147032	189523	98445.4	184189	159555	170601	199353	147942	115675	108352	121771	166296	144179	147057	134533	118272	137576	143822	80231.5		D-glucono-?-lactone-6-phosphate	1	1	0.135671		1.10794	0.205593	0.234505		1.10343	0.284079	0.266402		0.979622	0.284079	0.209018
hexose-phosphate	1.11565e+07	1.20123e+07	1.05042e+07	1.02456e+07	1.08391e+07	1.09981e+07	1.09281e+07	8.19329e+06	1.01621e+07	1.02645e+07	9.18641e+06	9.84818e+06	1.06168e+07	8.29251e+06	1.10886e+07	9.42987e+06	1.189e+07	1.0709e+07	1.04143e+07	1.11595e+07	8.30599e+06	8.49653e+06	6.95914e+06	6.60994e+06	9.4195e+06	9.51802e+06	9.68102e+06	9.1846e+06	9.61672e+06	9.24225e+06	9.8483e+06	8.85987e+06		hexose-phosphate	1	1	0.147349		0.929448	0.156401	0.127566		0.878263	0.130951	0.208756		0.887992	0.130951	0.0972077
glucose-1-phosphate	841384	788133	417277	930593	1.02981e+06	605375	829548	773337	737820	552898	737525	654510	686104	390650	762028	702288	1.12375e+06	1.03661e+06	1.09768e+06	1.19344e+06	761608	855218	682081	713657	883451	880224	791141	806991	873008	860847	906062	678351		glucose-1-phosphate	1	1	0.346328		0.840458	0.145444	0.260891		1.20089	0.134947	0.393423		1.07475	0.134947	0.2801
glucose-6-phosphate	592870	703977	668994	760878	617440	748077	683888	563971	628647	701498	634009	743336	687770	608151	818591	683026	699400	619559	563794	723270	547750	509855	588541	487907	609233	609965	680502	687379	644276	513789	571720	556942		glucose-6-phosphate	1	1	0.151104		1.03089	0.565625	0.150852		0.887639	0.075506	0.158066		0.912682	0.075506	0.133186
fructose-6-phosphate	605325	640648	690425	707066	665964	743515	642957	587285	635575	750884	840044	688081	943765	910470	1.02683e+06	829676	612326	671522	582981	577016	551373	418203	549860	415303	645918	608421	753705	569834	721791	600551	730178	657786		fructose-6-phosphate	1	1	0.111836		1.25404	0.00488688	0.223472		0.828777	0.00799912	0.150384		1.00095	0.00799912	0.129466
1,3-diphopshateglycerate	99661.4	101615	78333.6	85552.3	134099	134849	130977	195646	142340	102165	77846.9	118060	125496	115266		313452	114632	127545	141853	186437		149407	65583.8	61260.4	152639	135531	115526	89706.5	116756	144144	169209			1,3-diphopshateglycerate	1	1	0.443679		1.18317	0.490274	0.749284		1.00723	0.968229	0.491309		1.09858	0.968229	0.409941
2,3-Diphosphoglyceric acid	232694	145707	188896	188438	197724	209600	184282	249545	177736	230040	209703	216263	217289	1.70324e+06	1.79096e+06	1.84318e+06	275733	257807	222188	310238	311259	301448	265396	258966	231632	247375	225169	190406	246588	199662	232273	437897		2,3-Diphosphoglyceric acid	1	1	0.225183		4.00055	0.0561598	4.12248		1.37958	0.000265337	0.268771		1.25933	0.000265337	0.439509
S-ribosyl-L-homocysteine-nega	11194.6	3690.55	11761.8	12702	9716.46	19915.8	11069.8	20620.7	2603.96	8612.09	8476.95	10880	12595.6	9989.34	38163.6	18354.3	19828.3	10401.4	9780.75	17810	14357.3	15979.8	4403.81	5223.11	16664.9	8894.02	17603	8845.32	24790.9	11124.2	14493.2	6498.64		S-ribosyl-L-homocysteine-nega	1	1	0.616382		1.08944	0.7968	0.982155		0.971321	0.899126	0.619788		1.08188	0.899126	0.671093
inosine	1.52978e+06	1.22462e+06	1.15009e+06	1.95074e+06	1.51435e+06	1.79143e+06	2.1966e+06	1.12129e+06	1.71498e+06	1.94164e+06	1.44842e+06	2.71383e+06	1.56709e+06	1.428e+06	2.61192e+06	1.5143e+06	742910	447903	550198	837183	1.29998e+06	1.58277e+06	1.14463e+06	1.76402e+06	959340	1.03717e+06	842403	659478	1.43648e+06	1.24333e+06	1.11868e+06	1.2153e+06		inosine	1	1	0.357345		1.19723	0.202915	0.449525		0.6707	0.0347869	0.351645		0.682127	0.0347869	0.23332
6-phospho-D-gluconate	692546	914236	810235	672070	974476	1.08162e+06	844201	776974	867602	921297	914209	850505	1.20437e+06	1.00901e+06	1.14698e+06	966956	1.05532e+06	1.24395e+06	1.0141e+06	947836	726489	661289	784078	608277	759751	834847	868536	849379	1.09854e+06	834456	907009	686511		6-phospho-D-gluconate	1	1	0.23351		1.16472	0.0570165	0.245338		1.04064	0.715073	0.312193		1.01074	0.715073	0.218919
xanthosine	653014	512968	651369	714186	598963	641318	652012	592477	512216	461212	565375	648214	483863	432897	590363	488087	524679	519781	455564	641774	671007	772643	722136	773825	526925	637113	524626	503668	550735	538346	538140	539117		xanthosine	1	1	0.13393		0.833726	0.00714607	0.140037		1.01298	0.868033	0.217439		0.8689	0.868033	0.103932
D-sedoheptulose-1-7-phosphate	2.30209e+06	2.73495e+06	2.23495e+06	2.49399e+06	2.68395e+06	2.74343e+06	2.67156e+06	2.42093e+06	3.4821e+06	3.68783e+06	3.95286e+06	4.25232e+06	3.74507e+06	3.40721e+06	4.05654e+06	3.43201e+06	1.91868e+06	1.872e+06	1.5515e+06	1.88621e+06	1.60755e+06	1.6423e+06	1.83631e+06	1.21195e+06	3.17597e+06	2.97358e+06	2.83844e+06	2.76775e+06	2.93769e+06	2.49373e+06	2.96888e+06	2.02984e+06		D-sedoheptulose-1-7-phosphate	1	1	0.112184		1.47965	2.38238e-07	0.170066		0.666796	2.33917e-06	0.108312		1.09366	2.33917e-06	0.16608
N-acetyl-glucosamine-1-phosphate	706302	906164	855752	490545	539268	551902	1.05694e+06	1.07181e+06	952674	574310	610937	1.03432e+06	905430	1.03048e+06	1.22382e+06	471809	821997	963997	853008	1.02287e+06	893644	933788	843910	921233	435028	482688	832801	844690	986756	849880	1.05094e+06	1.32513e+06		N-acetyl-glucosamine-1-phosphate	1	1	0.42788		1.10117	0.542718	0.479382		1.17411	0.1402	0.365828		1.10184	0.1402	0.502968
glutathione-nega	2.14434e+06	3.22625e+06	2.68201e+06	2.1449e+06	2.6646e+06	3.53193e+06	3.42195e+06	2.79814e+06	1.78619e+07	2.42525e+07	2.45999e+07	2.68769e+07	2.46759e+07	2.63363e+07	3.17825e+07	2.5773e+07	9.79282e+06	6.74744e+06	4.49193e+06	4.82398e+06	2.44362e+06	2.54323e+06	1.99885e+06	1.181e+06	1.72136e+07	2.02195e+07	2.4622e+07	2.08937e+07	2.324e+07	2.0612e+07	2.45468e+07	1.46773e+07		glutathione-nega	1	1	0.266737		8.9395	1.57605e-10	2.16476		1.5045	0.18991	1.05719		7.34165	0.18991	1.85545
dUMP-nega	28689.5	41603.7	43510.6	38602.8	47959.8	38535.4	46983.7	55860.5	47462.4	49224.3	33032.7	48864.3	45057.9	47063.7	58313.4	48184.6	61678.6	27320.8	20062.1	35400	43055.4	52054.7	39708.6	33453	41834	55401.7	34527.2	33879.1	25926	21119.6	38168.7	22615.6		dUMP-nega	1	1	0.265877		1.10375	0.257132	0.263476		0.915104	0.520094	0.355953		0.80022	0.520094	0.304785
Geranyl-PP	857196	763758	808129	700947	987867	1.08815e+06	865073	642071	669265	776820	665338	494698	632867	379740	592509	585497	729044	724847	764991	775188	546056	620554	440788	502134	621709	642248	611386	493786	620379	616554	597007	495111		Geranyl-PP	1	1	0.246456		0.714524	0.00302574	0.189874		0.760235	0.0112782	0.203141		0.699843	0.0112782	0.140564
O8P-O1P	1.42359e+06	1.52839e+06	1.3265e+06	1.6184e+06	1.75845e+06	1.6745e+06	1.53868e+06	1.23829e+06	1.74829e+06	1.83996e+06	1.62538e+06	1.70197e+06	1.88397e+06	1.48021e+06	2.04515e+06	1.92138e+06	886886	1.45596e+06	1.00164e+06	1.23426e+06	879484	1.05154e+06	945649	842463	1.41232e+06	1.46191e+06	1.51222e+06	1.35979e+06	1.50756e+06	1.16093e+06	1.56189e+06	1.30898e+06		O8P-O1P	1	1	0.164373		1.17672	0.00936819	0.181042		0.685391	0.000228872	0.160149		0.93217	0.000228872	0.138762
dTMP-nega	80631.8	95546	70520.7	68262.5	85395.7	99205.8	69250.6	67871.2	76071.3	138743	97778.2	103337	119952	111045	117790	91331.1	31064.1	25027.3	22548.6	34944.7	28067.9	26166.8	39347.9	19755.7	56271.7	34801	34036	27109.1	32125.3	30753.9		20422.8		dTMP-nega	1	1	0.225669		1.34454	0.00470411	0.323836		0.356414	7.70224e-08	0.0994635		0.422761	7.70224e-08	0.155135
cyclic-AMP	104474	15607	140297	33808.3	25616.2	46482.2	98163.7	10790.2	87687	18495.9	31091.1	27655.8	20274.3	92396.7	160356	114938	14160.6	4878.22	113446	94317	19532.6	10485.4	49190.6	24160.9	83075.6	7941.66	6718.2	68948		64021				cyclic-AMP	1	1	1.14958		1.16341	0.706598	1.29641		0.694748	0.432414	0.893856		0.776719	0.432414	0.876497
fructose-1,6-bisphosphate	3.40623e+07	5.62035e+07	3.52977e+07	5.38985e+07	5.24243e+07	5.28067e+07	5.05246e+07	2.92295e+07	5.94267e+07	5.28913e+07	5.2371e+07	4.27493e+07	5.97662e+07	4.5703e+07	5.91621e+07	4.81244e+07	3.14415e+07	3.97288e+07	3.28272e+07	2.95546e+07	3.13802e+07	2.60978e+07	2.50758e+07	1.85798e+07	4.55222e+07	3.88497e+07	4.10154e+07	4.00726e+07	4.35911e+07	4.22838e+07	3.77508e+07	3.1255e+07		fructose-1,6-bisphosphate	1	1	0.334202		1.15296	0.141017	0.30868		0.64395	0.00244484	0.204848		0.878977	0.00244484	0.228618
trehalose-sucrose	1.01692e+06	965090	1.00664e+06	761069	1.10509e+06	998702	993384	1.08738e+06	933006	935419	910474	1.03116e+06	983700	918707	1.13347e+06	976443	1.08611e+06	921241	1.00864e+06	777551	1.37051e+06	1.16142e+06	1.30998e+06	1.42534e+06	1.06791e+06	1.12653e+06	991598	1.47167e+06	1.07022e+06	1.15408e+06	877417	1.19602e+06		trehalose-sucrose	1	1	0.149379		0.985896	0.762879	0.128454		1.14198	0.134342	0.259322		1.1287	0.134342	0.211858
Cellobiose	68878.5	83043.3	107045	76497	122104	125999	102012	80177.8	106328	78009.8	82682.5	74485.4	77292.9	80101.8	142037	80652.5	151465	100239	188609	119301	101018	92052.4	86009.9	144208	89897.4	123024	81640.9	169514	94206.3	115357	88912.4	104929		Cellobiose	1	1	0.319478		0.942322	0.629876	0.322375		1.28357	0.0869722	0.472156		1.13284	0.0869722	0.391879
orotidine-5-phosphate	7321.61	5437.94	10586.2	4609.13	15110.7	9687.92	9262.69	6179.82	7510.31	8648.45	7551.01	9619.74	6460.23	11051.5	7791.45	8091.03	7160.77	11375.9	13122.7	10753.6	9982.89	9852.62	8339.64	7050.43	17822.6	4644.76		6275.67	9885.37	9331.83	3560.43	8180.63		orotidine-5-phosphate	1	1	0.565482		0.978411	0.890004	0.425622		1.13846	0.418735	0.517954		1.0005	0.418735	0.683364
SBP	945472	1.50995e+06	1.46475e+06	842657	893176	1.11318e+06	1.52014e+06	1.07288e+06	1.97878e+06	1.58013e+06	1.94433e+06	1.48098e+06	1.66607e+06	1.6739e+06	2.11098e+06	1.6066e+06	991267	1.09299e+06	852587	823801	835419	784827	726925	558965	1.58483e+06	1.5415e+06	1.22411e+06	1.44103e+06	1.43624e+06	1.37255e+06	1.54583e+06	1.38298e+06		SBP	1	1	0.345412		1.49984	0.000456196	0.413769		0.712095	0.011544	0.221836		1.23145	0.011544	0.317129
trans, trans-farnesyl diphosphate	15219.3	6114.58	12107.2	20186.3	18191	18026.4	15517.8	16487.5	11679.3	11707.7	5792.05	5298.18	8244.16	8663.58	11828.4	12851.6	7455.82	14420.9	32328.8	14375.7	3795.42	23029.2	14284.7	15849.3	10011.5	21079.9	6735.84	28550	18191	8067.28	21248.2	20609.1		trans, trans-farnesyl diphosphate	1	1	0.408746		0.624251	0.00844392	0.263581		1.03028	0.896659	0.651523		1.10376	0.896659	0.598403
S-adenosyl-L-homocysteine-nega	88953.4	90292.4	103628	80594.3	162059	135071	117484	118021	145328	168035	152689	198165	127463	92431.8	130232	102461	135190	162847	143102	240762	152139	189000	151833	76331	168806	208937	199934	166402	157843	110543	113127	41102.5		S-adenosyl-L-homocysteine-nega	1	1	0.342893		1.24629	0.0967023	0.430821		1.39628	0.0358115	0.537395		1.30197	0.0358115	0.584834
dCDP-nega	53762.3	48422	63251.9	43344.9	64375.2	66531.1	30320.4	38388.3	48407.3	27661.3	66704.2	49346.1	70775.2	77317.9	77848.1	63104.5	27486.3	18643.5	25351.1	11048.4	21765.2	21129	14508.7	28249.8	13801.5	34658.4	37455.4	25607.7	28218.3	9128.57	27253.3	22997.6		dCDP-nega	1	1	0.367188		1.17818	0.256626	0.45579		0.411811	4.4464e-05	0.160417		0.487568	4.4464e-05	0.226732
5-phosphoribosyl-1-pyrophosphate	92371.6	99530.4	144311	102500	99274.9	120025	128396	83720.7	95003.4	112422	88171.1	68038.4	101881	52565.3	103853	68716.2	173862	187866	98164.4	206022	74908	230694	148722	137871	107623	76910.2	132664	107973	92797.9	136283	109027	77817.1		5-phosphoribosyl-1-pyrophosphate	1	1	0.264019		0.793734	0.0476033	0.243538		1.44589	0.0300191	0.557516		0.966634	0.0300191	0.272504
Deoxycholic acid	1978.66			2686.75			2834.65							1669.27		2774.49				4843.08					4259.8					3072.25				Deoxycholic acid	1	1	0.258813		0.888743	0.638908	0.352383		1.93722	#DIV/0!	#DIV/0!		1.4664	#DIV/0!	0.429929
OBP	768969	846852	349558	288603	231056	1.09927e+06	175736	324138	432867	329273	470468	385812	495749	484584	465757	499385	217619	284617		184015	187104	192999	863086	729780	402071	484993	334481					253341		OBP	1	1	0.951923		0.87261	0.606233	0.599016		0.744118	0.443919	0.756136		0.722243	0.443919	0.523048
dTDP-nega	106684	126356	110797	66296.1	97942.5	101351	85270.3	118761	164936	123971	101341	141530	225431	138950	213830	136524	45544.2	32717.6	19826.9	34156.9	45731.5	22598.9	15271.9	24833.7	66172.8	55487.5	52869.5	29349.4	53134.9	23472.2	25597.5	21003.7		dTDP-nega	1	1	0.265153		1.53236	0.00599093	0.513873		0.295875	2.93015e-07	0.125411		0.402096	2.93015e-07	0.190373
CDP-nega	405106	438600	435421	474343	531806	550168	196646	512547	511506	385735	506130	504546	623320	508701	698988	576629	542908	797092	699987	708565	354127	443122	339539	282981	525846	556905	474961	385787	522367	276941	590966	276250		CDP-nega	1	1	0.356635		1.21749	0.0827581	0.3729		1.17595	0.343994	0.53154		1.01845	0.343994	0.379396
UDP-nega	5.78982e+06	5.08608e+06	5.49993e+06	4.50819e+06	6.20995e+06	5.51367e+06	4.95974e+06	4.80991e+06	7.00796e+06	7.27423e+06	6.85188e+06	6.52237e+06	8.43981e+06	6.81758e+06	8.35841e+06	6.94127e+06	4.4101e+06	3.62186e+06	3.46546e+06	4.11219e+06	3.58433e+06	3.50628e+06	2.72038e+06	3.4864e+06	5.44004e+06	6.06125e+06	5.40191e+06	4.79038e+06	6.1488e+06	5.32521e+06	6.10477e+06	5.23372e+06		UDP-nega	1	1	0.149063		1.3737	2.63026e-05	0.199095		0.682134	1.74124e-05	0.118255		1.05023	1.74124e-05	0.144386
Cholic acid	4279.82		2952.54	3003.77					2620.52	1668.92										2680.08						6616.48				2269.13				Cholic acid	1	1	0.311667		0.628574	0.152009	0.240999		0.785477	#DIV/0!	#DIV/0!		1.3021	#DIV/0!	0.945535
trehalose-6-Phosphate		37493.6	43356.6			35486.5	49096.8		61249.6	69451.6	32945.9	59874.4	81507.2		61729.3	71066.9	82515.7	78850.4	57432.1	71379.2	41983.2	43463.2	46439.2		64450	45339.7	40907.7		75178.9		37437.4	35369.7		trehalose-6-Phosphate	1	1	0.210131		1.5123	0.027037	0.428415		1.45786	0.066922	0.469397		1.20364	0.066922	0.431483
Thiamine pyrophosphate	159727	176002	149691	189735	210083	254473	190182	173518	131483	143602	111079	104461	167269	131851	198648	181769	381447	417884	406675	337076	300193	281459	293036	267712	281520	263268	257029	238380	279858	282164	263950	260363		Thiamine pyrophosphate	1	1	0.246894		0.778339	0.0248826	0.224226		1.78626	2.41506e-05	0.443261		1.41447	2.41506e-05	0.259563
adenosine 5-phosphosulfate	63441.4	67011.7	52803.1	44387.4	92232.5	59044.5	83642	23652.8	40568.8	58966.7	24384.1	42921.9	51257.3	66012.8	62657.3	48804.7	52646	45745.6	40517.4	51636	24436.5	34722.3	28049.2	28517.9	50270.2	45616.8	30461.9	36685.6	56446.4	33375.8	54940.5	36627.8		adenosine 5-phosphosulfate	1	1	0.503049		0.813577	0.230029	0.365717		0.629908	0.0201006	0.288217		0.708379	0.0201006	0.301797
ADP-nega	8.68405e+06	9.99667e+06	1.09303e+07	9.27101e+06	1.19679e+07	1.17422e+07	5.70614e+06	7.91371e+06	9.82392e+06	1.09614e+07	9.9326e+06	8.45297e+06	1.2596e+07	8.55824e+06	1.13438e+07	9.72594e+06	8.29751e+06	6.55915e+06	7.28803e+06	7.80024e+06	6.02685e+06	6.37711e+06	4.84293e+06	5.42473e+06	7.37394e+06	7.90975e+06	7.15473e+06	6.14942e+06	8.72966e+06	7.64457e+06	7.62398e+06	7.4354e+06		ADP-nega	1	1	0.312566		1.06801	0.480988	0.278307		0.690398	0.00382134	0.196106		0.78756	0.00382134	0.189975
dGDP-nega	8.68405e+06	9.99667e+06	1.09303e+07	9.27101e+06	1.19679e+07	1.17422e+07	5.70614e+06	7.91371e+06	9.82392e+06	1.09614e+07	9.9326e+06	8.45297e+06	1.2596e+07	8.55824e+06	1.13438e+07	9.72594e+06	8.29751e+06	6.55915e+06	7.28803e+06	7.80024e+06	6.02685e+06	6.37711e+06	4.84293e+06	5.42473e+06	7.37394e+06	7.90975e+06	7.15473e+06	6.14942e+06	8.72966e+06	7.64457e+06	7.62398e+06	7.4354e+06		dGDP-nega	1	1	0.312566		1.06801	0.480988	0.278307		0.690398	0.00382134	0.196106		0.78756	0.00382134	0.189975
IDP-nega	1.13945e+06	1.37072e+06	1.4227e+06	1.14091e+06	1.60233e+06	1.62345e+06	1.28141e+06	1.05974e+06	1.28987e+06	1.37954e+06	1.28543e+06	1.0935e+06	1.74893e+06	1.20622e+06	1.48428e+06	1.25711e+06	1.10301e+06	873937	977056	1.01702e+06	797723	855975	653191	751390	966823	1.03383e+06	853856	882667	1.17777e+06	1.07762e+06	1.07795e+06	964397		IDP-nega	1	1	0.226618		1.00979	0.901553	0.220991		0.660604	0.000225334	0.153568		0.75511	0.000225334	0.14587
GDP-nega	121450	272899	283509	241015	328332	360654	263694	334030	325357	367945	351523	348452	480596	410599	551608	487097	179123	199820	288810	333989	225138	203045	129629	212256	304214	284888	250880	227583	351833	218392	277391	372635		GDP-nega	1	1	0.380907		1.50671	0.00304288	0.502809		0.80333	0.139105	0.316325		1.03728	0.139105	0.344087
CDP-ethanolamine	118388	143878	151913	111504	79093	92591.8	86100.2	70966.4	53480.8	62322.8	56233.1	59650.8	52923	42731.9	55710.4	57561.7	97329.1	110859	109401	131806	68358.5	73204.1	86333.3	67616.6	35326.4	29766.4	40649.1	46916.4	34323.5	33790	41104.3	48524		CDP-ethanolamine	1	1	0.395606		0.51568	0.000279801	0.154358		0.871815	0.324103	0.327215		0.363282	0.324103	0.119097
FMN	5606.45	2006.79	1691.39	4378.46	14674.8	6553.77		5593.64		8668.01	6865.1	4456.75	11360.4	6339.72	11608.2	10050	2252.9	5394.16	6107.2	3765.84	8686.28	8610.02	9313.65	9035.42	5430.98	10892	5335.1		7625.56	15750	5453.8	10264.4		FMN	1	1	1.05922		1.4652	0.18865	1.19294		1.14849	0.646942	0.977		1.49985	0.646942	1.30888
cholesteryl sulfate	510860	353252	373560	251567	404017	460090	446001	1.01327e+06	305979	319906	366139	299727	292202	761666	469261	888282	293025	520315	671200	445212	369216	325947	516115	734850	330464	451841	441197	335889	380651	356762	527115	2.16693e+06		cholesteryl sulfate	1	1	0.684202		0.971291	0.907726	0.678317		1.01659	0.937451	0.594038		1.30904	0.937451	1.46034
dCTP-nega	419577	366067	339344	300933	374414	412903	351779	340762	346602	362005	349525	354805	401877	310723	358895	350228	123700	103546	145769	117152	127238	113101	82023	106276	131965	133953	127176	126557	87517	88269.3	93745.9	69103.6		dCTP-nega	1	1	0.153379		0.975525	0.598006	0.126077		0.316199	1.99907e-10	0.0620972		0.295372	1.99907e-10	0.0766695
dUTP-nega	20661.8	24961.7	45482.8	32168.1	41054.6	32981.5	32691.9	26929.1	28713.9	41325.4	46424.3	37135.6	21335	42064.5	44898.7	26331.6	4616.71	12262.6	10580.2	10223.3	18083.7	15650	11659.1	7791.35	18231.4	8971.14	11188.1	9857.21	9910.04	12283	18451.4	4392.37		dUTP-nega	1	1	0.36041		1.12181	0.389097	0.4087		0.353663	1.72199e-05	0.159323		0.363072	1.72199e-05	0.173798
dTTP-nega	1.02804e+06	1.1911e+06	1.02954e+06	1.10781e+06	849314	1.60746e+06	1.30984e+06	932638	1.13619e+06	1.30503e+06	1.10939e+06	1.11716e+06	1.4901e+06	1.00754e+06	1.12432e+06	910958	404689	405543	413586	389736	359536	342800	305992	296222	434424	488622	474492	399058	282576	317498	328198	265281		dTTP-nega	1	1	0.299666		1.016	0.866131	0.266376		0.322238	3.96247e-07	0.0795384		0.330194	3.96247e-07	0.103935
CTP-nega	2.31141e+06	2.42947e+06	2.23537e+06	1.98333e+06	3.00188e+06	3.11193e+06	2.41471e+06	2.65347e+06	2.89978e+06	3.19144e+06	3.05719e+06	2.74827e+06	4.03904e+06	3.00871e+06	4.04098e+06	3.49831e+06	2.25862e+06	2.21071e+06	2.78258e+06	2.44084e+06	1.9059e+06	1.93007e+06	1.39649e+06	1.73922e+06	2.70949e+06	2.93326e+06	2.59233e+06	2.06141e+06	2.32706e+06	2.39424e+06	2.7715e+06	2.40129e+06		CTP-nega	1	1	0.215696		1.31488	0.00317409	0.282392		0.827365	0.0517968	0.213123		1.00243	0.0517968	0.189281
UTP-nega	2.96222e+07	3.6997e+07	3.72023e+07	3.0426e+07	3.97976e+07	4.38157e+07	3.30416e+07	3.11773e+07	3.58661e+07	4.29654e+07	3.69684e+07	3.4958e+07	4.85423e+07	3.72261e+07	4.04359e+07	3.72813e+07	3.6433e+07	3.1866e+07	3.56438e+07	3.14611e+07	2.66473e+07	2.67774e+07	1.98916e+07	2.37394e+07	3.82759e+07	3.71764e+07	3.53196e+07	3.34076e+07	3.38772e+07	3.63619e+07	3.60387e+07	3.06977e+07		UTP-nega	1	1	0.201866		1.11402	0.115747	0.204699		0.824092	0.0383152	0.202017		0.996722	0.0383152	0.157834
CDP-choline	21441	23314.2	29015	19802.5	20724.4	19616	14613.7	19926.7	20004.8	26670.6	24862.8	23160.8	25639.8	20365.1	32543.1	29129.6	12170.9	2979.04	14088.3	15473.2	4524.17	6683.78	5837.87	6125.13	11234.3	7755.23	18796.8	14191.8	10676.2	4222.94	10065.8	12745.3		CDP-choline	1	1	0.272374		1.20138	0.0604268	0.306962		0.402974	5.32303e-05	0.237005		0.532422	5.32303e-05	0.229725
dATP-nega	198120	296807	297928	177003	225919	253949	273166	244083	215435	292032	237258	224001	262431	174903	269767	211694	68505.8	90663.9	82160.9	105608	69144.5	54390.8	74681.5	69086	74094.2	92911	82007.6	97773.7	49577.2	69296.3	77282.2	35364.2		dATP-nega	1	1	0.252958		0.959606	0.634653	0.229753		0.312277	6.99661e-08	0.0851013		0.294008	6.99661e-08	0.100286
Taurodeoxycholic acid	10730.8	16048.4	14789.1	12251.6	12260.3	17011.5	15966.8	34548.3	24210.2	19679.4	30392.4	17394.7	21321.1	31009.9	19767.2	17910.5	9157.31	8632.43	6399.74	6715.49	10425.8	11290.4	16686.7	7256.85	17019.5	18170.7	19862.9	30741.4	16536.9	18145	21752.9	20162.2		Taurodeoxycholic acid	1	1	0.638835		1.35985	0.0875888	0.693108		0.57306	0.0284665	0.327783		1.21544	0.0284665	0.613144
ATP-nega	5.17115e+07	7.12264e+07	7.28074e+07	6.40297e+07	5.77459e+07	6.50597e+07	6.98659e+07	5.66383e+07	6.18622e+07	7.25823e+07	6.41541e+07	5.34307e+07	8.22339e+07	5.00257e+07	6.75075e+07	6.10786e+07	7.90279e+07	6.81835e+07	8.10074e+07	7.4615e+07	5.31917e+07	5.36909e+07	4.39637e+07	4.07136e+07	5.93295e+07	5.94443e+07	5.27131e+07	4.85966e+07	5.3817e+07	5.6652e+07	5.88832e+07	4.87818e+07		ATP-nega	1	1	0.169786		1.00744	0.918116	0.201693		0.971142	0.772921	0.275958		0.860794	0.772921	0.125287
dGTP	5.17115e+07	7.12264e+07	7.28074e+07	6.40297e+07	5.77459e+07	6.50597e+07	6.98659e+07	5.66383e+07	6.18622e+07	7.25823e+07	6.41541e+07	5.34307e+07	8.22339e+07	5.00257e+07	6.75075e+07	6.10786e+07	7.90279e+07	6.81835e+07	8.10074e+07	7.4615e+07	5.31917e+07	5.36909e+07	4.39637e+07	4.07136e+07	5.93295e+07	5.94443e+07	5.27131e+07	4.85966e+07	5.3817e+07	5.6652e+07	5.88832e+07	4.87818e+07		dGTP	1	1	0.169786		1.00744	0.918116	0.201693		0.971142	0.772921	0.275958		0.860794	0.772921	0.125287
GTP-nega	10437.8	19206	35502.6	34696.6	26085.9	25677.9	36662.6								3.68309e+06		79196.7	58010.6	35985.5	64012		39556.3			29483.5		26922.7			37380.9				GTP-nega	1	1	0.509101		136.94	#DIV/0!	#DIV/0!		2.05804	0.00496989	0.994787		1.16236	0.00496989	0.46494
UDP-D-glucose	6.16271e+06	5.76699e+06	6.4994e+06	5.26211e+06	7.68873e+06	7.15676e+06	7.45832e+06	4.60675e+06	8.4863e+06	7.95341e+06	6.93853e+06	8.05456e+06	1.01605e+07	8.24834e+06	9.31619e+06	7.73472e+06	6.13743e+06	6.9338e+06	6.40711e+06	5.80472e+06	5.12783e+06	4.67582e+06	5.5914e+06	4.01475e+06	8.55952e+06	8.87857e+06	8.50228e+06	7.74057e+06	8.33715e+06	7.71685e+06	8.26223e+06	6.43194e+06		UDP-D-glucose	1	1	0.243259		1.32194	0.00155134	0.276008		0.883227	0.170532	0.213903		1.27326	0.170532	0.250234
UDP-D-glucuronate	693476	631796	747733	580371	1.44624e+06	1.23859e+06	1.16851e+06	756608	2.5416e+06	2.5505e+06	2.18626e+06	2.29333e+06	2.78464e+06	2.47678e+06	2.57562e+06	2.38224e+06	933059	875349	834905	775408	983144	928665	968841	774695	2.63601e+06	2.36558e+06	2.87731e+06	2.37457e+06	2.22347e+06	2.28036e+06	2.61656e+06	2.16885e+06		UDP-D-glucuronate	1	1	0.508196		2.72478	1.16007e-08	1.00026		0.973944	0.845255	0.361592		2.6906	0.845255	1.0035
ADP-D-glucose	3288.68	11693.7	24040.5	9745.63	40664.2	43568.6	17467.7	38444.9	20275	20198.6	16722.1	23481.1	8959.63	19655.6	36290.3	29823.8	20315	41193.7	46911.1	29583.5	26422.4	23484.8	8824.56	16160.5	13078.6	24054.8	28369.4	18135	25168.1	13065.4	29361.2	23438.9		ADP-D-glucose	1	1	0.931738		0.928497	0.790234	0.704602		1.12694	0.678211	0.913934		0.924608	0.678211	0.666449
guanosine 5-diphosphate,3-diphosphate	417691	787452	739197	805368	973597	1.18417e+06	807690	853160	984845	1.11516e+06	860889	887983	1.04032e+06	854266	1.41726e+06	980410	751275	1.04584e+06	1.07836e+06	1.0135e+06	783259	668444	541613	625058	981059	1.00176e+06	899566	729268	968690	856000	1.09736e+06	831265		guanosine 5-diphosphate,3-diphosphate	1	1	0.372345		1.23945	0.0710776	0.396748		0.990718	0.943578	0.362612		1.12129	0.943578	0.326901
UDP-N-acetyl-glucosamine	2.15587e+06	1.6544e+06	2.07232e+06	1.70817e+06	2.47706e+06	2.73134e+06	2.60668e+06	1.64512e+06	2.88529e+06	3.37065e+06	2.95196e+06	2.94082e+06	3.20104e+06	2.44004e+06	3.23411e+06	2.59565e+06	2.29e+06	2.35088e+06	1.93712e+06	2.27127e+06	1.7151e+06	1.65146e+06	1.70557e+06	1.40938e+06	2.73475e+06	2.5417e+06	2.92278e+06	2.21286e+06	2.85062e+06	2.34498e+06	2.85054e+06	2.17679e+06		UDP-N-acetyl-glucosamine	1	1	0.291661		1.38523	0.000765737	0.322429		0.899115	0.298366	0.248289		1.2102	0.298366	0.287194
glutathione disulfide-nega	6.65306e+06	5.59462e+06	6.9291e+06	5.33242e+06	7.27157e+06	8.24827e+06	8.50602e+06	4.88704e+06	1.66591e+07	2.15911e+07	1.74344e+07	1.78434e+07	1.77312e+07	1.40713e+07	1.71434e+07	1.63054e+07	7.35357e+06	6.98033e+06	6.46583e+06	5.77093e+06	4.55742e+06	3.89175e+06	4.92842e+06	2.77758e+06	1.90442e+07	1.86561e+07	1.81172e+07	1.91853e+07	1.83483e+07	1.692e+07	1.87881e+07	1.43185e+07		glutathione disulfide-nega	1	1	0.282041		2.59779	7.94242e-09	0.605726		0.799778	0.089416	0.286294		2.68386	0.089416	0.587615
NAD+_nega	2.03185e+06	1.70721e+06	1.82738e+06	1.95807e+06	2.35492e+06	2.46465e+06	2.36952e+06	2.00252e+06	1.79202e+06	1.84828e+06	2.04433e+06	2.07601e+06	2.26616e+06	1.97112e+06	2.67943e+06	2.33977e+06	1.76987e+06	1.77634e+06	1.25283e+06	1.70868e+06	1.53835e+06	1.47977e+06	1.65959e+06	1.42265e+06	1.73292e+06	1.80155e+06	1.78257e+06	1.67956e+06	1.81195e+06	1.41149e+06	1.68673e+06	1.3825e+06		NAD+_nega	1	1	0.18669		1.01801	0.794624	0.193591		0.754247	0.000641887	0.133408		0.794997	0.000641887	0.132915
NADH-nega	250297	196506	263016	218399	311387	346386	341171	161686	364767	369010	278204	352606	352229	57281.1	463585	213885	246082	276984	294896	177495	214441	240210	200322	199174	298759	305807	279624	255160	279153	252273	193773	74824.9		NADH-nega	1	1	0.367423		1.17365	0.379684	0.564463		0.885467	0.303091	0.277904		0.928443	0.303091	0.378605
dephospho-CoA-nega	15484.7	15653.7	15944.3	10071.5	17103.2	11786.1	14996.9	9141.18	12802.9	22669.4	12739.4	20624.8	20229.2	9110.89	26770.2	18095.8	6761.29	5395.23		9142.74	7135.23	3912.72	8743.81	10006.4	14259.6	3174.09	8439.15	10262.5	14366.3	8432.57	9649.21	3699.98		dephospho-CoA-nega	1	1	0.307736		1.29825	0.101245	0.513517		0.530008	0.00039709	0.195192		0.656039	0.00039709	0.334078
cyclic bis(3->5) dimeric GMP								2446.29						1679.07						4297.23	2275.99	5870.62		2434.84							3669.82	3699.13		cyclic bis(3->5) dimeric GMP	1	#DIV/0!	#DIV/0!		0.686373	#DIV/0!	#DIV/0!		1.52053	#DIV/0!	#DIV/0!		1.50615	#DIV/0!	#DIV/0!
NADP+_nega	237847	234000	235369	177882	303486	280091	245133	231786	344295	375976	365761	410477	406427	393622	431889	543106	268557	232978	228469	296557	250320	257580	188318	214433	360253	415768	369852	316318	422983	363099	370116	406402		NADP+_nega	1	1	0.215015		1.68152	1.21772e-05	0.357656		0.995691	0.953531	0.204933		1.55469	0.953531	0.277398
NADPH-nega	9226.99	17015.5	15817.4	14759.2	38970.6	29388.8	24932.6	14679.7	22964.7	16336.1	13412.9	19673	21302.8	14360.7	20579.4	5890.32	16900	16178.3	20660.3	16136	15830.1	9395.2	20763	10788.9	9308.57	8971.23	21484.2	15794.3	12304.7	13446.4	20758.3	1643.31		NADPH-nega	1	1	0.670537		0.816308	0.357384	0.472253		0.76856	0.22324	0.414481		0.629349	0.22324	0.435744
coenzyme A-nega	17156.1	29641.1	30352.3	15620.8	32209.9	16726.3	20100	15314.3	50913.7	41596.3	60775.6	63892.4	83143.1	72155.9	76528.2	65174.8	27017.8	28396	24681.4	19362	18514.9	18964.2	15615.3	4305.24	34640.4	36766.1	46805.7	24746.6	40410.2	46385.8	27274.8	27445		coenzyme A-nega	1	1	0.465968		2.90299	1.92167e-06	1.13414		0.885593	0.508972	0.452253		1.60611	0.508972	0.65716
acetyl-CoA-nega	11266.7	14625.9	15030.7	10428.8	15466.8	7611.7	11782.7	7549.37	3739.44	1796.41	3093.38	7613.4	3396.11	4583.96	4010.5		14874.6	11771.1	7607.66	15480.3	6834.75	10337.3	8524.19	4298.81	6051.39	6106.01	8749.46	1993.13	4113.4	8754.55	5033.43	3221.05		acetyl-CoA-nega	1	1	0.380459		0.344129	7.62261e-05	0.179529		0.850325	0.340593	0.405076		0.469509	0.340593	0.243034
propionyl-CoA-nega	2651.32	2664.52			2146.75		3903.18							1886.98		2432.7	2705.51		6582.42	3775.34					2327.16						3766.41			propionyl-CoA-nega	1	1	0.372157		0.760121	0.308831	0.241775		1.53247	0.214136	0.811905		1.07227	0.214136	0.455965
butyryl-CoA		3657.16		2684.35		5226.85	2850.26	3509.85					3179.69	3676.37	6734.03				3745.59		4152.51	8609.41				4078.41					3763.65	3700.18		butyryl-CoA	1	1	0.397232		1.26336	0.385709	0.643492		1.53457	0.186822	0.867234		1.07299	0.186822	0.306635
acetoacetyl-CoA-nega	1978.59		1639.37	3697.79	2514.02					1631.2								2452.89	2348.52										1908.07					acetoacetyl-CoA-nega	1	1	0.51902		0.663778	#DIV/0!	#DIV/0!		0.976911	0.937249	0.359784		0.776444	0.937249	#DIV/0!
malonyl-CoA-nega	11211.9	9680.58	4638.71	6041.07	12520.8	6546.98	6061.57	6641.35			5240.15	5078.16	3906.6	5337.86	4864.71	3120.93	2700.19		3755.88							2065.3	3069.3							malonyl-CoA-nega	1	1	0.506873		0.579879	0.0176735	0.236018		0.40769	0.056849	0.173897		0.324242	0.056849	0.146781
3-hydroxybutyryl-CoA	13190.2	14654.2	13484.1	10402.5	13240	17428.5	12841.3	14144.6	7872.49	5266.74	14062.5	12375.7	9231.32	8689.91	6734.69	14916.9		3424.91	5163.35	4808.47	4909.8	4304.44	4771.26	5438.46	3876.86	6116.02	4986.6	7884.18	6868.5	7267.48	2511.69	4933.91		3-hydroxybutyryl-CoA	1	1	0.203632		0.723589	0.0187534	0.276896		0.34291	3.55483e-08	0.0689769		0.406317	3.55483e-08	0.145391
succinyl-CoA-methylmalonyl-CoA-nega			1662.67	2395.26		2178.3				3000.28		2538.46			6814.05	2427										3262.84								succinyl-CoA-methylmalonyl-CoA-nega	1	1	0.25601		1.77749	0.253263	1.05756		#DIV/0!	#DIV/0!	#DIV/0!		1.56962	#DIV/0!	#DIV/0!
3-hydroxy-3-methylglutaryl-CoA-nega			2967.22	3357.54	3932.08	11231.7	3208.41		3607.76	2333.59		3981.14	2479.06		2617.58			5885.81	4226.77	4837.24	3776.24	7469	14585.5	13530.6	4658.41	4501.15	5378.55	3548.33	5330.79		5872.89	4932.42		3-hydroxy-3-methylglutaryl-CoA-nega	1	1	1.01223		0.608138	0.265127	0.460373		1.57079	0.270474	1.44444		0.989786	0.270474	0.724676
2-hydroxygluterate	2.89623e+06	2.91169e+06	3.19022e+06	2.69931e+06	3.58251e+06	3.79802e+06	3.26989e+06	2.46961e+06	2.73286e+06	2.72774e+06	2.49821e+06	2.00763e+06	2.78623e+06	2.36914e+06	2.66133e+06	2.6714e+06	3.34047e+06	3.50615e+06	3.4263e+06	3.31279e+06	3.16456e+06	2.82721e+06	3.66101e+06	2.58184e+06	2.95325e+06	2.97751e+06	3.16396e+06	2.85951e+06	3.32901e+06	2.69198e+06	3.35557e+06	2.28489e+06		2-hydroxygluterate	1	1	0.203287		0.824199	0.00983652	0.145325		1.04041	0.545986	0.189258		0.951574	0.545986	0.177908
2-deoxyglucose-6-phosphate	3.80567e+07	2.81556e+07	3.50625e+07	2.87003e+07	3.12646e+07	3.154e+07	3.0171e+07	1.70626e+07	1.91202e+07	2.45808e+07	2.1446e+07	1.77924e+07	2.41712e+07	1.76123e+07	1.8854e+07	1.7457e+07	3.71376e+07	2.82469e+07	3.22873e+07	3.16382e+07	2.37644e+07	2.87782e+07	2.22971e+07	2.22475e+07	2.30831e+07	2.55292e+07	2.1291e+07	2.22301e+07	2.12675e+07	2.84074e+07	2.38081e+07	2.19536e+07		2-deoxyglucose-6-phosphate	1	1	0.291127		0.670937	0.00110617	0.168864		0.943269	0.564425	0.263113		0.781498	0.564425	0.180547
3-hydroxybuterate	226644	221769	127909	131926	247317	137185	197456	116259	164028	168773	147423	99448.8	219294	92359.9	110855	121008	197649	172526	137162	209521	153590	148329	90752.2	158945	250295	186171	92554.5	114969	176579	61484.4	112774	165930		3-hydroxybuterate	1	1	0.424964		0.798591	0.163159	0.342161		0.901888	0.461353	0.342609		0.825301	0.461353	0.425598
4-phosphopantothenate	111777	251603	179023	144443	203202	156900	154095	147193	200240	114973	145348	139833	193578	226939	153988	176767	88536.4	208082	210566	191687	115833	129717	154371	124692	228136	227351	152390	203761	173764	344009	240676	207944		4-phosphopantothenate	1	1	0.359023		1.00254	0.983186	0.335887		0.907471	0.493472	0.356575		1.31878	0.493472	0.477274
dehydroascorbic acid	3627.76	3330.11	7911.95	11085.5	12522.3	6171.25	5297.99	10371.5		7352.8	8496.02	6980.42	2129.2	1657.95	5952.6	2450.27	3495.49	1960.35		7761.52		2739.32	5828.11	5752.66	8144.43	5299.3	2298.21	5519.15	4573.61	2299.81	2489.06	5755.34		dehydroascorbic acid	1	1	0.655442		0.663513	0.150725	0.486575		0.608714	0.0962727	0.407086		0.603115	0.0962727	0.392637
Urea	2.59369e+06	1.71455e+06	1.91474e+06	1.7653e+06	2.33998e+06	2.30432e+06	2.79276e+06	1.78204e+06	2.06917e+06	1.73323e+06	1.93691e+06	1.51603e+06	1.95345e+06	2.20935e+06	2.11013e+06	2.13133e+06	1.21312e+06	1.00769e+06	1.04504e+06	1.36561e+06	1.94608e+06	2.00992e+06	2.52647e+06	2.46877e+06	1.9015e+06	2.01363e+06	1.76044e+06	1.81712e+06	2.34103e+06	2.0368e+06	2.00149e+06	1.99476e+06		Urea	1	1	0.272029		0.910051	0.267713	0.205484		0.789353	0.107455	0.325649		0.922092	0.107455	0.195281
ethanolamine																																		ethanolamine	#DIV/0!	#DIV/0!	#DIV/0!		#DIV/0!	#DIV/0!	#DIV/0!		#DIV/0!	#DIV/0!	#DIV/0!		#DIV/0!	#DIV/0!	#DIV/0!
Imidazole																																		Imidazole	#DIV/0!	#DIV/0!	#DIV/0!		#DIV/0!	#DIV/0!	#DIV/0!		#DIV/0!	#DIV/0!	#DIV/0!		#DIV/0!	#DIV/0!	#DIV/0!
glycine	170486	199161	225075	193344	261158	241802	271281	238574	164686	173357	163050	182763	223687	202854	193450	213098	302541	314361	284513	267866	280212	239136	265183	243900	195930	186564	204479	218647	208709	275652	251120	261069		glycine	1	1	0.219655		0.842335	0.0300109	0.164617		1.22035	0.0063099	0.222555		1.00072	0.0063099	0.213487
alanine	2.01928e+07	1.91748e+07	1.97064e+07	2.00609e+07	2.22424e+07	2.17423e+07	2.29319e+07	2.00201e+07	1.85345e+07	1.79873e+07	1.8875e+07	1.75841e+07	1.97304e+07	1.96083e+07	2.04944e+07	1.90395e+07	2.07081e+07	2.10859e+07	2.12636e+07	2.14964e+07	2.11581e+07	2.09642e+07	2.28657e+07	2.14785e+07	1.98605e+07	2.00412e+07	1.94135e+07	1.96455e+07	1.93953e+07	2.08244e+07	2.07151e+07	2.15432e+07		alanine	1	1	0.0923406		0.914386	0.00898918	0.0754034		1.0298	0.264578	0.0742774		0.972103	0.264578	0.0735618
betaine aldehyde	114655	122812	115016	146041	120978	152973	115014	153166	80314.6	115880	109235	128107	135296	139062	169188	118552	228742	255401	246721	231448	172438	176723	132125	155396	133672	135866	146486	122973	142210	205157	195097	139953		betaine aldehyde	1	1	0.190059		0.956739	0.616839	0.235907		1.53653	0.00133306	0.411075		1.1737	0.00133306	0.280755
choline																																		choline	#DIV/0!	#DIV/0!	#DIV/0!		#DIV/0!	#DIV/0!	#DIV/0!		#DIV/0!	#DIV/0!	#DIV/0!		#DIV/0!	#DIV/0!	#DIV/0!
4-aminobutyrate	659398	755958	793747	731741	940918	1.05642e+06	982643	925967	1.41521e+06	1.22771e+06	1.23612e+06	1.27324e+06	1.47952e+06	1.31416e+06	1.4463e+06	1.18355e+06	912551	886079	987220	789346	698318	730943	803919	713164	740920	879087	831302	780621	797811	772045	777747	931892		4-aminobutyrate	1	1	0.230568		1.54464	3.43212e-06	0.283466		0.952496	0.519819	0.197356		0.951019	0.519819	0.171888
dimethylglycine	1.4022e+06	3.7794e+06	1.27458e+06	1.29323e+06	1.76552e+06	1.51337e+06	1.63559e+06	1.56719e+06	1.75769e+06	1.20579e+06	1.08962e+06	1.51797e+06	2.69416e+06	7.92266e+06	1.64867e+06	1.62e+06	935873	953656	5.20609e+06	1.55524e+06	1.34056e+06	1.26646e+06	758084	1.72825e+06	2.29247e+06	1.68017e+06	1.26188e+06	1.9705e+06	1.44713e+06	2.22993e+06	2.0647e+06	5.76544e+06		dimethylglycine	1	1	0.656273		1.36719	0.45713	1.42533		0.965789	0.919171	0.928738		1.31488	0.919171	1.01014
serine	2.79453e+07	2.81837e+07	2.54714e+07	2.99405e+07	2.84569e+07	3.04983e+07	3.11139e+07	3.02601e+07	2.46138e+07	2.53055e+07	2.45653e+07	2.57126e+07	2.88663e+07	2.6515e+07	2.7181e+07	2.84363e+07	3.10246e+07	2.94782e+07	3.21458e+07	3.12719e+07	3.21289e+07	3.29928e+07	3.20571e+07	3.13065e+07	3.03224e+07	2.97174e+07	2.82086e+07	2.89314e+07	2.87549e+07	2.8706e+07	2.90062e+07	3.19033e+07		serine	1	1	0.089796		0.910837	0.0104117	0.0811751		1.08857	0.004097	0.078055		1.01587	0.004097	0.0764415
cytosine	75500.4	88496.8	69791.9	85419	65255.7	89006.3	105973	100196	71869.8	69326.2	67235.4	97796.3	55025.7	78819.5	80628.2	63029.5	89379.1	84456.5	74666	108089	76772.5	69914.4	97116.8	86626.4	84856.3	58757.1	72277.9	76323.3	79640.2	88040.3	69688.4	99074.7		cytosine	1	1	0.236306		0.858884	0.0996148	0.209526		1.01086	0.892309	0.224192		0.924989	0.892309	0.212146
Creatinine	312536	410893	285286	447632	506820	458978	558627	431898	344352	394751	350254	345113	350911	312501	488896	418740	383069	293544	291413	302556	374657	348415	382992	471778	339611	313043	353050	336758	383578	426193	328456	360813		Creatinine	1	1	0.303357		0.880694	0.201679	0.230476		0.834661	0.0914268	0.229398		0.832634	0.0914268	0.19731
proline	8.13529e+07	7.97103e+07	7.5061e+07	7.67491e+07	9.40398e+07	9.25056e+07	9.16101e+07	8.85876e+07	8.26025e+07	7.88858e+07	8.05624e+07	8.39019e+07	9.07419e+07	8.5424e+07	9.50921e+07	8.78437e+07	8.62796e+07	9.15624e+07	9.308e+07	9.70211e+07	8.53434e+07	8.99071e+07	8.51103e+07	8.78599e+07	8.25702e+07	8.52235e+07	8.58128e+07	8.24687e+07	8.57688e+07	8.51178e+07	9.08265e+07	9.34448e+07		proline	1	1	0.126271		1.008	0.839357	0.110168		1.05378	0.158298	0.106281		1.01709	0.158298	0.101431
indole	129742	118344	116768	126205	131323	142472	141635	100205	98299.5	89354.2	85165.8	118353	87168.9	120235	88397.2	94653.5	109226	98456.7	131714	107437	162989	129333	137021	131711	107988	104853	101064	123275	129902	135742	125620	130195		indole	1	1	0.157062		0.77643	0.00125223	0.140639		1.00119	0.98668	0.197441		0.952265	0.98668	0.149093
betaine	4.7712e+07	4.61697e+07	4.4257e+07	4.68184e+07	5.3067e+07	5.28891e+07	5.11555e+07	4.86693e+07	4.56905e+07	4.44851e+07	4.54859e+07	4.56292e+07	4.41327e+07	4.46773e+07	5.08886e+07	4.69305e+07	4.78667e+07	5.27232e+07	4.62796e+07	5.91711e+07	5.33015e+07	5.32252e+07	5.27338e+07	5.37896e+07	4.7872e+07	4.87959e+07	4.87684e+07	4.83588e+07	5.34824e+07	4.69834e+07	5.24488e+07	4.67119e+07		betaine	1	1	0.0935987		0.941603	0.0570329	0.0764684		1.07256	0.0685403	0.107128		1.00687	0.0685403	0.0836936
valine	4.71367e+06	4.31709e+06	4.05502e+06	4.26202e+06	4.76459e+06	4.77725e+06	5.03864e+06	5.19684e+06	4.20213e+06	3.82156e+06	3.77431e+06	4.34246e+06	3.95637e+06	4.57308e+06	4.21371e+06	4.34094e+06	3.72399e+06	3.69392e+06	3.19083e+06	3.84065e+06	5.78573e+06	4.6626e+06	5.48154e+06	6.27091e+06	4.56919e+06	4.68872e+06	4.70457e+06	4.56792e+06	4.95152e+06	4.27008e+06	4.52777e+06	5.15195e+06		valine	1	1	0.120701		0.894935	0.0129568	0.097232		0.987207	0.89148	0.260082		1.00826	0.89148	0.103968
threonine	1.76082e+07	1.90091e+07	1.73968e+07	1.8298e+07	2.02792e+07	2.16423e+07	2.15803e+07	2.14271e+07	1.77048e+07	1.76115e+07	1.82305e+07	1.85401e+07	2.00924e+07	1.92384e+07	2.00427e+07	2.07994e+07	1.8056e+07	1.72955e+07	1.77169e+07	2.17784e+07	1.95279e+07	2.13377e+07	2.21234e+07	2.024e+07	1.85425e+07	1.96429e+07	1.945e+07	2.11673e+07	1.91885e+07	1.85352e+07	1.86319e+07	2.19405e+07		threonine	1	1	0.129665		0.968321	0.428886	0.10757		1.00531	0.912139	0.134003		0.999097	0.912139	0.112126
homoserine	16888.4	20382.3	11305.2	8961.1	21415.7	30362.1	21282	10788.2	20853.5	12988.5	31611.3	14466.7	27921.3	24276.3	29551.6	22691.6	15767.4	20552.6	14889.2	18157.8	27395.7	34835.4	20357.6	24866.5	28320.1	31977.3	17442.4	32271	20412	36218.3	30211.4	33836.9		homoserine	1	1	0.573737		1.30396	0.145606	0.65308		1.25064	0.221396	0.632183		1.63164	0.221396	0.759778
purine	258417	231330	206325	246939	316835	283207	212013	225173	203901	203721	186901	208640	160231	214184	271279	192307	184024	121995	119409	152932	278638	231524	245144	391492	217167	233130	218766	152308	240037	244165	189893	191796		purine	1	1	0.215039		0.82877	0.0286084	0.179358		0.871187	0.378703	0.393772		0.852049	0.378703	0.180602
cysteine	1.34984e+06	1.84096e+06	2.02619e+06	1.98879e+06	1.43175e+06	1.05694e+06	1.98223e+06	2.1779e+06	3.9298e+06	2.47686e+06	3.98153e+06	4.03433e+06	2.43742e+06	3.24264e+06	2.71119e+06	2.90647e+06	3.03526e+06	3.17394e+06	3.05969e+06	2.18295e+06	1.96036e+06	1.83555e+06	1.02634e+06	529146	2.8774e+06	3.89774e+06	3.10662e+06	2.53277e+06	1.86654e+06	1.88195e+06	1.78974e+06	2.03559e+06		cysteine	1	1	0.326305		1.85644	0.000112302	0.582398		1.21283	0.33962	0.629131		1.44272	0.33962	0.547575
nicotinamide	5.28656e+07	3.72942e+07	3.448e+07	3.55782e+07	4.35058e+07	3.90312e+07	4.87721e+07	4.11149e+07	3.63538e+07	3.23393e+07	3.39126e+07	3.22787e+07	4.14986e+07	3.87893e+07	3.18574e+07	3.49141e+07	2.44564e+07	2.23151e+07	2.52275e+07	2.42634e+07	3.94595e+07	3.85484e+07	4.4817e+07	4.65093e+07	3.56105e+07	3.78202e+07	3.71313e+07	3.61401e+07	3.60692e+07	4.82803e+07	3.27899e+07	4.14019e+07		nicotinamide	1	1	0.220537		0.847589	0.0285976	0.156109		0.798446	0.0688359	0.273587		0.917633	0.0688359	0.183095
Imidazoleacetic acid	1.01337e+06	915246	851535	909550	955666	1.02919e+06	959997	806095	740944	904296	737091	773869	843127	871646	879303	944386	719475	813105	821107	1.07848e+06	888222	943241	1.14683e+06	987896	921174	862128	962433	963083	806743	1.09365e+06	974131	895986		Imidazoleacetic acid	1	1	0.115645		0.899742	0.0294004	0.111337		0.994318	0.927932	0.174314		1.0052	0.927932	0.123682
thymine	40031.3	2138.43	49792.5	48881.5	68391.3	64780.1	9078.12	55286.2	83637.7	70353.5	70680.9	81066.5	111668	55832.6	76175.2	7510.61	26712.8	50979.1	35386.3	36784.8	38492.7	51684.3	45021.8	4153.68	4028.03	39942.4	61565.5	56731	78058.2	43799.8	3088.2	45497.4		thymine	1	1	0.816643		1.64586	0.0643303	1.18211		0.854708	0.556777	0.613257		0.983247	0.556777	0.843558
DL-Pipecolic acid	6.33909e+07	6.04368e+07	6.87458e+07	5.91692e+07	7.38427e+07	7.44692e+07	6.99019e+07	6.59415e+07	5.86413e+07	5.85614e+07	5.57183e+07	5.68223e+07	6.63514e+07	5.8609e+07	6.6531e+07	5.73445e+07	8.2613e+07	8.54858e+07	8.16976e+07	8.42152e+07	7.35592e+07	6.83076e+07	7.2039e+07	6.69485e+07	7.02102e+07	6.96399e+07	6.77646e+07	7.07036e+07	6.81124e+07	6.96391e+07	7.02032e+07	6.89242e+07		DL-Pipecolic acid	1	1	0.121702		0.893041	0.0131339	0.0992788		1.14736	0.0103575	0.148935		1.03601	0.0103575	0.0905153
N-Acetylputrescine	11612.7	18216.7	7803.02	22613.1	5806.2	10405.6	14253.5	2774.34	9630	5767.38	10923	6638.59	19203.3	13569.2	10880.9	19766.8	4506.14		8147.98	5913.92	9786.13	10013.3	12020	9058.03	9517.02	13450.8	9503.03	13596.1	10251.4	8337.82	11804.9	10523.7		N-Acetylputrescine	1	1	0.79142		1.03096	0.904368	0.729328		0.726722	0.248294	0.462053		0.930464	0.248294	0.545797
hydroxyproline	2.70028e+07	2.64305e+07	2.52152e+07	2.72299e+07	3.06122e+07	3.0932e+07	3.1655e+07	2.77536e+07	2.78712e+07	2.64788e+07	2.63839e+07	2.70842e+07	2.94159e+07	2.90876e+07	3.08596e+07	2.7674e+07	2.58349e+07	2.95139e+07	3.03589e+07	2.83736e+07	2.89153e+07	2.93951e+07	2.90253e+07	2.84451e+07	2.93675e+07	3.05086e+07	2.82305e+07	3.06437e+07	2.78291e+07	2.88781e+07	2.84335e+07	3.20287e+07		hydroxyproline	1	1	0.118697		0.991289	0.80983	0.0998583		1.01336	0.700312	0.0971662		1.04007	0.700312	0.101124
leucine-isoleucine	1.41556e+08	1.16172e+08	1.29192e+08	1.43119e+08	1.42438e+08	1.5144e+08	1.54122e+08	1.3957e+08	1.17437e+08	1.23133e+08	1.2181e+08	1.36243e+08	1.2363e+08	1.15128e+08	1.50759e+08	1.30052e+08	1.35666e+08	1.21345e+08	1.04528e+08	1.35615e+08	1.57518e+08	1.6917e+08	1.52172e+08	1.70392e+08	1.26899e+08	1.45645e+08	1.28248e+08	1.28712e+08	1.40367e+08	1.21929e+08	1.3894e+08	1.26609e+08		leucine-isoleucine	1	1	0.122942		0.911045	0.0551798	0.114825		1.02577	0.703819	0.188865		0.946083	0.703819	0.10158
ornithine	1.26605e+07	1.01757e+07	1.09026e+07	1.02606e+07	1.1744e+07	9.73304e+06	1.2133e+07	1.10948e+07	1.11376e+07	1.03342e+07	8.75308e+06	9.1301e+06	1.12902e+07	1.05422e+07	8.66028e+06	9.15678e+06	5.96579e+06	5.77555e+06	7.83932e+06	5.81404e+06	1.03071e+07	9.00628e+06	1.14465e+07	1.12818e+07	9.81571e+06	9.25489e+06	9.60911e+06	8.52519e+06	8.49861e+06	1.11815e+07	8.06829e+06	1.04897e+07		ornithine	1	1	0.130981		0.890649	0.0367113	0.127152		0.760237	0.012889	0.230348		0.8505	0.012889	0.124234
asparagine	2.45224e+07	2.63069e+07	2.42294e+07	2.66391e+07	2.94634e+07	2.66937e+07	2.79659e+07	2.6289e+07	2.66007e+07	2.50773e+07	2.33914e+07	2.36506e+07	2.79427e+07	2.72611e+07	2.97337e+07	2.78516e+07	2.77134e+07	3.12228e+07	3.1146e+07	3.15211e+07	2.88868e+07	2.76038e+07	2.52515e+07	2.77895e+07	3.15064e+07	2.92212e+07	2.57961e+07	2.65695e+07	2.50954e+07	2.43838e+07	2.6626e+07	2.85532e+07		asparagine	1	1	0.0904614		0.997168	0.940602	0.105481		1.08969	0.0309883	0.109359		1.0266	0.0309883	0.111098
aspartate	1.20892e+07	1.12986e+07	1.03195e+07	1.06855e+07	1.1168e+07	1.23052e+07	1.12855e+07	1.00192e+07	9.43782e+06	7.98941e+06	7.38257e+06	8.57714e+06	9.56216e+06	8.32746e+06	8.29073e+06	8.64549e+06	1.30741e+07	1.31807e+07	1.19043e+07	1.25835e+07	1.20167e+07	1.08319e+07	1.15209e+07	1.29756e+07	9.69586e+06	8.67294e+06	8.35853e+06	8.76432e+06	1.00248e+07	9.15186e+06	9.21194e+06	9.76712e+06		aspartate	1	1	0.101062		0.76497	7.22947e-06	0.0845084		1.1	0.0162933	0.108683		0.825916	0.0162933	0.0792
adenine	6.12793e+06	5.12437e+06	5.29025e+06	4.96418e+06	6.3004e+06	6.68118e+06	6.12283e+06	4.92291e+06	5.64612e+06	5.528e+06	5.55448e+06	5.49438e+06	6.55115e+06	4.61401e+06	5.58386e+06	5.02859e+06	5.48817e+06	5.25842e+06	5.63956e+06	4.8856e+06	5.37669e+06	4.92141e+06	4.49813e+06	4.8869e+06	5.11098e+06	4.8291e+06	4.61243e+06	4.47588e+06	5.23052e+06	4.74212e+06	5.1158e+06	5.23432e+06		adenine	1	1	0.17135		0.966323	0.549627	0.152197		0.899434	0.0593009	0.128064		0.864213	0.0593009	0.116695
Methylcysteine	2.81076e+06	2.46915e+06	2.51718e+06	2.61447e+06	2.73264e+06	2.92639e+06	2.92035e+06	2.29137e+06	2.31995e+06	2.13714e+06	2.2678e+06	2.48786e+06	2.40358e+06	2.37876e+06	2.49036e+06	2.19233e+06	2.45599e+06	2.61681e+06	2.34361e+06	2.66633e+06	3.09845e+06	2.83867e+06	3.0169e+06	2.77944e+06	2.59807e+06	2.74792e+06	2.79671e+06	2.43931e+06	2.51854e+06	2.73451e+06	2.4552e+06	2.95594e+06		Methylcysteine	1	1	0.120812		0.87762	0.00341864	0.0894999		1.02509	0.593317	0.13125		0.998304	0.593317	0.10952
homocysteine	85687.5	82586.8	63952.2	85255	77226.5	85727.2	91287.7	77820.9	110129	90393.5	105909	121754	123399	110536	6579.24	1984.67	70481.6	100555	4048.25	86672	74047.9	83189.8	87396.7	75527.4	80240.9	129184	123993	46497.5	4594.04	98233.9	8479.63	42882		homocysteine	1	1	0.145051		1.03255	0.885209	0.626687		0.895888	0.446108	0.372834		0.822277	0.446108	0.605434
methylnicotinamide	7111.88	99664.6	115491	53488.1	153651	152028	319261	173521	83531.3	134042	170995	96172.9	129993	145706	69151.5	126954	191340	413121	179868	1.29024e+06	90198.3	407809	181407	340356	143806	172381	116238	116311	80470.8	131975	87046.1	95508.3		methylnicotinamide	1	1	0.980736		0.89046	0.68109	0.667397		2.88055	0.0919998	3.48664		0.878534	0.0919998	0.651343
histidinol	5927.83	4996.72	11863.6	9059.91	7874.39	10193.4	3921.79	6293.05	2951.65	2999.25	7835.58	10471	6746.43	8494.25	9728.62	6229.29	9466.25	9318.38		11294.9	8323.95	6261.96	7286.21	11877.4	2692.66	8153.07	6935.16	5520.02		6143.08	4618.47	11517.2		histidinol	1	1	0.51215		0.922258	0.679343	0.501737		1.21315	0.22432	0.515516		0.866297	0.22432	0.487563
lysine	1.73302e+07	1.47363e+07	1.40437e+07	1.53929e+07	1.74743e+07	1.61489e+07	1.84636e+07	1.45225e+07	1.48456e+07	1.38901e+07	1.31668e+07	1.48852e+07	1.44834e+07	1.44546e+07	1.47753e+07	1.34617e+07	1.00292e+07	1.00105e+07	1.01673e+07	9.63796e+06	1.61511e+07	1.51248e+07	1.67889e+07	1.79085e+07	1.40602e+07	1.40309e+07	1.48356e+07	1.39907e+07	1.34384e+07	1.55225e+07	1.27413e+07	1.50734e+07		lysine	1	1	0.141646		0.889553	0.0120167	0.0981821		0.825979	0.0640332	0.238201		0.887448	0.0640332	0.10528
glutamine	1.07252e+08	1.05816e+08	1.06729e+08	1.09133e+08	1.17112e+08	1.18524e+08	1.20861e+08	1.1148e+08	1.01647e+08	1.02462e+08	1.02013e+08	1.01697e+08	1.13299e+08	1.05494e+08	1.10775e+08	1.01007e+08	1.30008e+08	1.32096e+08	1.30166e+08	1.35786e+08	1.22577e+08	1.25374e+08	1.2269e+08	1.24109e+08	1.15039e+08	1.20547e+08	1.17129e+08	1.17804e+08	1.15637e+08	1.11771e+08	1.17747e+08	1.29609e+08		glutamine	1	1	0.0745003		0.934763	0.0160371	0.0647568		1.14037	4.46192e-05	0.0741008		1.05394	4.46192e-05	0.0727979
O-acetyl-L-serine	138116	76491.1	68157.6	72067	96548.4	113040	112166	79383.8	91913.8	77923.7	86227.7	98481.3	121804	124915	97718.1	74496.9	90513.4	40591.8	40998.9	54778.5	61353.6	41344.4	49014.6	40957.5	68662.5	63762.4	67445.9	57484.2	65805.9	50920.2	74094.2	56303.8		O-acetyl-L-serine	1	1	0.371459		1.02316	0.84452	0.332803		0.554985	0.00148558	0.23325		0.667326	0.00148558	0.19286
glutamate	1.01842e+08	9.9602e+07	1.03153e+08	9.59465e+07	1.13462e+08	1.14184e+08	1.09739e+08	1.02212e+08	9.52437e+07	9.6581e+07	9.42601e+07	8.95371e+07	1.11549e+08	9.93924e+07	1.02311e+08	1.01545e+08	1.32924e+08	1.44707e+08	1.40398e+08	1.4068e+08	1.07845e+08	1.06158e+08	1.1898e+08	1.00025e+08	1.1497e+08	1.14512e+08	1.13838e+08	1.14328e+08	1.16627e+08	1.07327e+08	1.1067e+08	1.14649e+08		glutamate	1	1	0.0897132		0.94082	0.0822874	0.0868066		1.18042	0.0138967	0.185892		1.07949	0.0138967	0.0740298
methionine	2.11818e+07	1.62295e+07	1.85318e+07	1.81497e+07	1.91261e+07	1.91992e+07	1.97241e+07	1.5266e+07	1.49918e+07	1.46684e+07	1.49939e+07	1.44751e+07	1.7495e+07	1.73973e+07	1.43817e+07	1.57867e+07	1.65783e+07	1.48311e+07	1.46228e+07	1.72189e+07	2.04586e+07	2.07737e+07	2.05752e+07	2.13847e+07	1.71085e+07	1.91115e+07	1.69472e+07	1.79995e+07	1.79012e+07	1.77939e+07	1.82762e+07	1.64035e+07		methionine	1	1	0.145813		0.84249	0.00290781	0.110649		0.993454	0.921262	0.183578		0.960201	0.921262	0.109228
guanine	256943	201062	202216	213770	156491	167918	191037	140359	122031	192077	141894	180884	119149	134636	175660	128817	153801	105251	63078.2	96747.8	233564	236330	189182	325767	107333	138929	150384	109325	189347	133510	141218	62798.8		guanine	1	1	0.270747		0.781247	0.0237895	0.212792		0.917587	0.646904	0.492096		0.675152	0.646904	0.232888
histidine	1.24741e+08	1.26326e+08	1.1825e+08	1.2042e+08	1.41584e+08	1.37816e+08	1.4297e+08	1.30277e+08	1.22183e+08	1.15922e+08	1.20581e+08	1.18829e+08	1.35044e+08	1.46987e+08	1.26823e+08	1.22711e+08	1.16997e+08	1.07739e+08	1.23945e+08	1.098e+08	1.34858e+08	1.35682e+08	1.42302e+08	1.49212e+08	1.32483e+08	1.34539e+08	1.31452e+08	1.34428e+08	1.27423e+08	1.49156e+08	1.25218e+08	1.59079e+08		histidine	1	1	0.103283		0.96805	0.413186	0.105572		0.979039	0.674617	0.13747		1.04931	0.674617	0.117004
2-Aminooctanoic acid	2.74688e+06	3.80953e+06	2.80039e+06	3.4939e+06	3.95958e+06	4.51929e+06	3.72122e+06	3.39095e+06	3.24033e+06	3.20573e+06	2.83556e+06	4.21053e+06	4.5459e+06	3.35515e+06	4.83689e+06	3.28626e+06	6.2554e+06	7.28359e+06	9.37653e+06	6.84213e+06	4.6054e+06	6.30414e+06	4.39608e+06	5.7378e+06	5.39543e+06	5.16058e+06	4.83858e+06	5.71239e+06	4.98344e+06	7.38059e+06	4.89954e+06	3.97762e+06		2-Aminooctanoic acid	1	1	0.234809		1.03778	0.692529	0.268693		1.78614	0.000353369	0.534769		1.48894	0.000353369	0.370674
carnitine	2.80452e+07	3.15894e+07	2.51993e+07	3.30183e+07	3.35046e+07	3.50685e+07	3.19084e+07	3.02008e+07	2.80605e+07	2.71357e+07	2.76115e+07	3.08292e+07	3.42561e+07	3.05873e+07	3.86217e+07	3.0952e+07	5.20257e+07	5.52691e+07	5.72751e+07	5.51763e+07	3.51044e+07	4.46281e+07	3.2948e+07	3.8929e+07	4.01452e+07	3.8774e+07	4.03928e+07	3.84114e+07	3.63818e+07	4.25387e+07	4.08144e+07	3.81672e+07		carnitine	1	1	0.145032		0.998066	0.97337	0.160819		1.49418	0.000870717	0.35087		1.26995	0.000870717	0.143933
Methionine sulfoxide	1.67452e+06	1.33064e+06	1.32247e+06	1.38962e+06	1.40677e+06	1.61798e+06	1.80128e+06	2.05968e+06	1.68639e+06	1.30726e+06	1.2695e+06	1.47637e+06	1.4356e+06	1.72227e+06	1.57692e+06	1.49135e+06	1.01167e+06	1.08547e+06	1.17571e+06	1.21481e+06	1.85599e+06	1.74265e+06	1.96469e+06	1.86807e+06	1.40826e+06	1.56695e+06	1.40708e+06	1.55006e+06	1.26532e+06	1.55143e+06	1.57151e+06	1.9057e+06		Methionine sulfoxide	1	1	0.236054		0.949432	0.478107	0.189108		0.945735	0.622728	0.300229		0.970115	0.622728	0.200815
phenylalanine	1.98759e+07	1.50849e+07	1.6114e+07	2.09442e+07	2.42266e+07	2.19524e+07	2.26358e+07	1.87028e+07	1.6033e+07	1.72243e+07	1.7674e+07	2.06335e+07	1.64182e+07	1.56904e+07	2.2082e+07	1.85427e+07	1.50535e+07	1.18872e+07	8.28869e+06	1.28447e+07	2.16556e+07	2.44522e+07	2.02648e+07	2.85493e+07	1.53682e+07	1.7546e+07	1.67884e+07	1.49834e+07	1.69589e+07	1.70125e+07	1.42773e+07	1.55132e+07		phenylalanine	1	1	0.224968		0.904483	0.189323	0.183684		0.896321	0.456761	0.376597		0.805131	0.456761	0.140858
Pyridoxamine	15830.6	11967.1	6591.97	7305.81	8589.63	6528.77	24954.9	19221.5	15035.3	5979.34	10376.4	3462.61	12062.5	7371.38	4313.39	9490.1	4091.25	5395.62	7048.38	8540.29	2047.99	13698	10601.8	21199.9	11931.6	2910.76	7668.82	4052.45	6123.8	17892.9	14264.2	8936.9		Pyridoxamine	1	1	0.762622		0.674235	0.162127	0.480823		0.719112	0.292008	0.621305		0.730579	0.292008	0.567878
pyridoxine	2.34298e+07	1.78445e+07	1.56239e+07	1.82639e+07	1.97858e+07	2.1749e+07	2.3982e+07	1.99608e+07	2.08841e+07	1.71786e+07	1.89644e+07	1.99407e+07	1.87134e+07	2.01206e+07	1.31009e+07	2.00544e+07	1.2313e+07	1.06664e+07	1.21627e+07	1.40588e+07	2.07975e+07	2.26791e+07	2.23297e+07	2.16961e+07	2.17149e+07	1.85706e+07	1.67193e+07	1.68098e+07	1.63481e+07	1.98142e+07	1.51402e+07	2.03347e+07		pyridoxine	1	1	0.20183		0.927274	0.295993	0.18179		0.850994	0.177543	0.287218		0.905454	0.177543	0.172206
1-Methyl-Histidine	1.20738e+07	1.36658e+07	8.94043e+06	1.86536e+07	3.09809e+07	2.74871e+07	3.21074e+07	1.92316e+07	2.09218e+07	1.46357e+07	9.00339e+06	1.55309e+07	2.27336e+07	3.5798e+07	7.81393e+06	1.21027e+07	5.6893e+06	1.28549e+07	1.95457e+07	2.7298e+06	7.25327e+06	1.51015e+07	1.90479e+07	1.8076e+07	9.28618e+06	1.48158e+07	2.38961e+07	2.11096e+07	2.30226e+07		1.47937e+07	1.59513e+07		1-Methyl-Histidine	1	1	0.614525		0.849206	0.504897	0.579407		0.614797	0.0633127	0.417587		0.860784	0.0633127	0.45559
N-acetyl-L-ornithine	5838.31	2701.87	15754.9		8122.64	8483.78	7128.28	13739.5	18479.1	3940	5398.39	4063.21		11869.2		6346.14	10669.2			17370.3	13161.2	5884.14	12649.4	12004.7	8288.78	15050.2	23363.9	5216.45	5663.52	4319.28		17552.6		N-acetyl-L-ornithine	1	1	0.722908		0.946189	0.870467	0.811857		1.35497	0.204724	0.811751		1.28631	0.204724	1.06232
arginine	1.25599e+08	1.08935e+08	1.18502e+08	1.17767e+08	1.29451e+08	1.2408e+08	1.34669e+08	1.29631e+08	1.20093e+08	1.07025e+08	1.1503e+08	1.19072e+08	1.22005e+08	1.19192e+08	1.11905e+08	1.13595e+08	1.01993e+08	9.49836e+07	9.10468e+07	9.63798e+07	1.33002e+08	1.27481e+08	1.36451e+08	1.413e+08	1.11798e+08	1.19955e+08	1.13201e+08	1.17688e+08	1.17101e+08	1.27288e+08	1.18952e+08	1.30224e+08		arginine	1	1	0.0940122		0.938586	0.0426662	0.0744576		0.933243	0.320543	0.181782		0.9672	0.320543	0.0824163
citrulline	7.29336e+06	6.63848e+06	6.34672e+06	7.14613e+06	8.05617e+06	7.02722e+06	8.26997e+06	7.04794e+06	6.70262e+06	6.11279e+06	6.89944e+06	7.06308e+06	7.2947e+06	7.01327e+06	6.81439e+06	6.61374e+06	7.19273e+06	6.24876e+06	6.49425e+06	6.00938e+06	8.5938e+06	8.59388e+06	8.80842e+06	1.01552e+07	7.2608e+06	8.04644e+06	7.4462e+06	7.74728e+06	6.82176e+06	8.40922e+06	7.47596e+06	9.14963e+06		citrulline	1	1	0.127645		0.942725	0.137326	0.0982754		1.07385	0.368496	0.227535		1.07836	0.368496	0.140294
N-carbamoyl-L-aspartate	211376	166879	186188	160529	169845	167754	250707	161926	154192	129007	168848	176683	155507	178188	182133	146946	91053.4	132939	84119.7	146271	203844	210956	178432	252103	165876	136279	196419	170264	148716	163160	146372	182795		N-carbamoyl-L-aspartate	1	1	0.242495		0.875476	0.0971845	0.179972		0.881043	0.372333	0.355948		0.887932	0.372333	0.186484
glucosamine	1.38531e+06	1.2178e+06	1.21519e+06	1.23879e+06	1.98084e+06	1.84029e+06	1.94509e+06	1.20655e+06	1.75303e+06	1.33409e+06	1.02441e+06	1.01276e+06	1.58562e+06	1.08584e+06	1.71234e+06	1.26627e+06	1.19989e+06	1.06759e+06	976333	835206	1.45975e+06	1.18184e+06	1.54875e+06	1.92598e+06	1.27974e+06	1.36955e+06	1.05139e+06	991676	1.03013e+06	1.35998e+06	1.01519e+06	1.4235e+06		glucosamine	1	1	0.332173		0.895634	0.356835	0.291656		0.847502	0.21504	0.307842		0.79146	0.21504	0.222751
tyrosine	1.16713e+07	8.32721e+06	1.09543e+07	9.91748e+06	1.17423e+07	1.09638e+07	1.10449e+07	1.15704e+07	9.04751e+06	8.07778e+06	9.25459e+06	1.03799e+07	9.8491e+06	9.51675e+06	1.02468e+07	9.8207e+06	9.21121e+06	1.00357e+07	8.04035e+06	1.12082e+07	1.39632e+07	1.25917e+07	1.21699e+07	1.43842e+07	1.03017e+07	1.17903e+07	1.13341e+07	1.03666e+07	1.02931e+07	1.06728e+07	1.00835e+07	1.12049e+07		tyrosine	1	1	0.150803		0.883997	0.0215521	0.116669		1.0628	0.461344	0.237623		0.998321	0.461344	0.120739
Phosphorylcholine	3.28593e+08	3.65745e+08	3.61042e+08	3.41021e+08	9.55164e+07	8.67604e+07	8.46413e+07	3.52142e+08	3.17882e+08	3.54418e+08	3.60463e+08	3.43958e+08	9.40947e+07	3.15006e+08	1.11846e+08	2.85746e+08	3.71417e+08	3.73875e+08	3.98575e+08	3.4836e+08	3.48858e+08	3.24409e+08	3.33419e+08	3.26178e+08	3.87557e+08	2.95058e+08	3.93448e+08	3.90027e+08	3.63016e+08	3.79731e+08	3.58085e+08	3.9183e+08		Phosphorylcholine	1	1	0.760405		1.08333	0.736626	0.72259		1.40171	0.0569379	0.760832		1.46803	0.0569379	0.800155
3-phospho-serine	25126.9	17781.1	24066.4	13334.9	10246.5	26980.6	21498	61007.3	11885.8	20622.8	10854.1		10108.6	14207.9	23954.2	22966.8	17940.1	19592.5	23160.1	17847.5	19723.8	7629.65	17508.1	8830.01		6920.52	14882.4	6073.01	9411.02	6363.16		10381.3		3-phospho-serine	1	1	0.886402		0.654722	0.194476	0.47468		0.661021	0.170392	0.467855		0.360134	0.170392	0.262739
N6-Acetyl-L-lysine	7.10353e+07	6.19506e+07	6.91896e+07	7.25542e+07	6.67347e+07	6.84063e+07	7.82844e+07	6.34801e+07	6.56635e+07	5.64112e+07	6.27407e+07	6.34401e+07	6.40693e+07	6.32212e+07	5.87159e+07	6.40928e+07	4.92641e+07	4.85771e+07	4.23207e+07	3.50921e+07	6.26616e+07	5.38069e+07	6.69825e+07	6.22329e+07	5.93269e+07	5.92548e+07	2.51614e+07	5.5315e+07	5.5463e+07	3.25323e+07	5.01149e+07	5.65741e+07		N6-Acetyl-L-lysine	1	1	0.106469		0.903413	0.00761813	0.0815757		0.763073	0.00191846	0.169097		0.713773	0.00191846	0.196663
Acetyllysine	5.55396e+07	5.52102e+07	5.95117e+07	5.77307e+07	6.23596e+07	5.36849e+07	3.88642e+07	5.46673e+07	5.18453e+07	5.09081e+07	5.47987e+07	5.27577e+07	5.40128e+07	5.08247e+07	4.58818e+07	5.53419e+07	4.21975e+07	3.36916e+07	3.19927e+07	3.57281e+07	5.34699e+07	5.42856e+07	5.68814e+07	5.4069e+07	1.70193e+07	3.90113e+07	4.6626e+07	4.80772e+07	3.43229e+07	5.41613e+07	4.03538e+07	4.7368e+07		Acetyllysine	1	1	0.181196		0.951557	0.342605	0.133802		0.828021	0.0535616	0.219318		0.747175	0.0535616	0.230364
N-acetyl-glutamine	238105	153025	147151	125590	312238	238225	214058	113842	157192	127492	308300	109153	152116	102379	180889	132651	86658.1	85891.9	83422.7	90203	144153	112699	148364	166667	129683	129278	77499.2	76119.7	105445	69533.2	82155.7	86756.1		N-acetyl-glutamine	1	1	0.505598		0.823592	0.329483	0.450307		0.595279	0.0121542	0.275062		0.490503	0.0121542	0.215038
N-acetyl-glutamate	420535	336770	379798	304941	335713	398496	316501	272652	259527	223060	225570	201451	325019	244134	293401	249959	155112	91537.9	116257	88694.3	126725	105819	109397	108180	102162	88519.4	83589.6	79289.6	99398.5	75201.3	90596.2	89738.5		N-acetyl-glutamate	1	1	0.205024		0.731221	0.00109387	0.157142		0.326072	8.23445e-09	0.0771611		0.256199	8.23445e-09	0.045754
Ng,NG-dimethyl-L-arginine	3.57163e+07	3.81202e+07	3.56083e+07	2.83352e+07	3.36119e+07	3.22792e+07	3.61583e+07	2.53315e+07	3.22038e+07	2.87792e+07	2.87462e+07	2.78986e+07	3.41453e+07	3.23929e+07	2.48112e+07	2.88906e+07	1.88022e+07	2.22532e+07	2.56703e+07	1.91856e+07	2.46498e+07	2.27519e+07	2.79434e+07	2.2745e+07	2.74572e+07	2.52614e+07	2.70616e+07	2.52406e+07	2.39996e+07	3.37393e+07	2.37705e+07	2.69367e+07		Ng,NG-dimethyl-L-arginine	1	1	0.185047		0.89707	0.0885207	0.148149		0.693924	9.63067e-05	0.13029		0.805047	9.63067e-05	0.142298
Acetylcarnitine DL	3.76292e+07	4.21879e+07	3.93378e+07	3.83016e+07	6.23653e+07	6.22972e+07	5.95914e+07	5.53797e+07	5.26466e+07	4.72214e+07	5.10058e+07	5.1089e+07	6.17982e+07	4.8492e+07	6.06051e+07	5.16874e+07	5.85721e+07	6.20443e+07	5.46015e+07	6.02266e+07	5.43329e+07	5.62192e+07	6.03001e+07	4.87666e+07	5.47094e+07	5.70461e+07	5.59604e+07	5.48891e+07	5.66245e+07	4.30485e+07	5.67913e+07	4.22095e+07		Acetylcarnitine DL	1	1	0.321011		1.06914	0.448969	0.265328		1.14599	0.111454	0.274274		1.06092	0.111454	0.271774
tryptophan	1.12239e+06	1.20927e+06	1.06914e+06	973077	1.8099e+06	1.60932e+06	1.67172e+06	1.54381e+06	1.60119e+06	1.3779e+06	1.41612e+06	1.50765e+06	1.78247e+06	1.36898e+06	1.67685e+06	1.38954e+06	1.26309e+06	1.81191e+06	1.49085e+06	1.49317e+06	1.55838e+06	1.60443e+06	1.61898e+06	1.30352e+06	1.31718e+06	1.6066e+06	1.53745e+06	1.54266e+06	1.91195e+06	1.10987e+06	1.48956e+06	1.11268e+06		tryptophan	1	1	0.3266		1.10102	0.285571	0.278465		1.10316	0.287961	0.285225		1.05626	0.287961	0.31214
Kynurenine	45850.5	34440.3	42374.2	66088.8	46360.8	56634.6	63933	48906.4	39202.2	43098.2	40470.8	58138.4	40672.9	28891.2	85152.2	51174.6	39536	35991.5	8575.53	18494	45305.4	78058.3	54529.4	57031	27102.9	40145.7	24407	27957.1	35893.9	29700	33543.4	18139		Kynurenine	1	1	0.303812		0.956034	0.761703	0.397179		0.834233	0.351222	0.471528		0.585506	0.351222	0.185625
N-acetyl-glucosamine	105323	97227.6	71101	88645.9	84793.2	95127.2	114624	85875.3	97976.9	92512.2	47158	86347	69667.2	75445	85411.6	65583.9	61304.7	36191.7	71359.4	19107.9	90926	102554	100203	73368.1	84600.5	102747	101283	81294.8	92724.4	61103.9	71507.6	81400.2		N-acetyl-glucosamine	1	1	0.204233		0.834909	0.0610753	0.215074		0.747276	0.0618977	0.338941		0.91106	0.0618977	0.202032
Flavone	21353.2	15324.4	39574.6	57608.2	46820.4	16177	39254.8	54926	14499.4	17781.6	37946	31525.3	36202.2	13266.1	29577.2	61943.1	68479.1	78977.7	84699.4	85747.9	27710.6	52644.9	56708.3	21260	56654	51321.8	62129.8	40301.5	85634.8	56940.9	86284.7	73074.1		Flavone	1	1	0.656979		0.83405	0.475289	0.586238		1.6363	0.0467704	1.02138		1.76039	0.0467704	0.933464
cystathionine	326381	425931	351108	402079	409673	383493	433848	431105	416671	482524	461555	516413	534278	504899	547888	505668	389361	417105	439771	489270	332000	335339	326661	288835	517887	438614	593882	600046	565648	501477	531231	538122		cystathionine	1	1	0.140475		1.25486	0.000213171	0.163925		0.954079	0.5237	0.196352		1.35506	0.5237	0.189222
5-methoxytryptophan	5217.87		3624.37	5704.4	10019	3634.19		5581.33	4906.89	1976.22	4247.17	3490.66	4945.73			4361.22			2347.87	8008.84	6047.25			3955.53	3072.28	4061.3	3451.21	2762.35		2690.53	3771.44	5841.78		5-methoxytryptophan	1	1	0.588506		0.708321	0.15237	0.355522		0.904032	0.735185	0.577369		0.650851	0.735185	0.332444
Cystine	6.27801e+06	4.31289e+06	3.54958e+06	4.8238e+06	3.36663e+06	1.9712e+06	3.39374e+06	4.63343e+06	865012	401458	522207	429504	252847	350037	277309	291661	1.11783e+06	1.43547e+06	1.68194e+06	2.7134e+06	4.40531e+06	5.05894e+06	4.52686e+06	8.34623e+06	714026	676925	438424	567352	344220	298940	309487	450857		Cystine	1	1	0.4474		0.10486	1.56781e-06	0.0594678		0.905866	0.701357	0.666836		0.117548	0.701357	0.0546915
cytidine	336730	306505	318478	481617	286594	300739	376476	14190.2	164373	192357	84934.6	180813	47003	11961.7	12457	5356.2	152815	62834.1	13734	36029.1	17395.7	125773	514795	45742	32963.6	13868.1	35657.9	234124	26139.9	6595.07	2492.05	6535.64		cytidine	1	1	0.617805		0.28879	0.00150005	0.294326		0.400242	0.0301248	0.577986		0.148008	0.0301248	0.26422
biotin	510488	399945	412718	481982	531637	372442	655956	463858	448750	367636	422055	527502	448487	408927	541250	409975	280906	319109	208464	312193	498899	546659	483048	653079	393366	368565	414192	336283	413351	469000	333466	393124		biotin	1	1	0.267352		0.933548	0.420986	0.216345		0.862454	0.314888	0.360737		0.81518	0.314888	0.180105
deoxyadenosine	27068.6	4327.02	2355.98		60824	30261.1	47411.8		1978.11	20675.4	1630.46		22315.9	22753	34858.2	1732.13	3546.59	22063	23987.4	3026.99	1888.88	12017.4	21460.4	16559.2	23274	11825	19180.4		13374.9	10280.1	14750.7	7800.16		deoxyadenosine	1	1	1.13948		0.527194	0.212618	0.629039		0.455228	0.105127	0.488461		0.500034	0.105127	0.443494
Glycerophosphocholine	1.11074e+08	1.18493e+08	1.08891e+08	1.13692e+08	1.02311e+08	1.08321e+08	1.0542e+08	1.05803e+08	1.12429e+08	1.10555e+08	1.0833e+08	1.09297e+08	1.17612e+08	1.15561e+08	1.28531e+08	1.14678e+08	7.97636e+07	8.69972e+07	9.29597e+07	9.05458e+07	5.59923e+07	6.3746e+07	6.11493e+07	6.99887e+07	5.93633e+07	6.04329e+07	5.9306e+07	6.47749e+07	5.90525e+07	6.27777e+07	6.2566e+07	7.18137e+07		Glycerophosphocholine	1	1	0.0663978		1.04919	0.0868002	0.0769951		0.687803	1.82272e-05	0.135001		0.572179	1.82272e-05	0.0474983
acadesine	16853.4	12881.2	16156.1	7257.28	15413.3	33361.1	28525.5	9112.6	43676.8	43709.9	24636.4	49458.2	44333.1	25026.5	37765.3	44355.8	23445	15168.6	12981	7558.61	17415.3	18392.4	19283.1	9326.97	32113.2	33715.9	36461.5	34483.2	37647.4	41458.6	34904.4	17070.9		acadesine	1	1	0.735551		2.24248	0.000339674	1.28389		0.885429	0.599138	0.551897		1.91928	0.599138	1.08047
D-glucosamine-6-phosphate	12476	6328.16	13510.3		21304.7	14802.4	11406.7	3180.14	10626.3	13300.9	8470.02	9199.77	14197.2	5684.63	13468.4	9664.31	4958.45	7846.4	3746.15		3946.62	7038.46	5821.85	5394.39	5040.39	7339.65	11087.7	8671.83	12965.2	5760.65	8808.54	10687.3		D-glucosamine-6-phosphate	1	1	0.700674		0.891899	0.594027	0.506178		0.466848	0.0173767	0.264214		0.741684	0.0173767	0.433036
D-glucosamine-1-phosphate	31987.8	20848.7	28011.2	32557.4	22019.4	26926.5	25265.1	30089	36085.2	22650.3	20582.8	12998.7	20523	21698.7	11468.5	16992.9	41172.3	50092.8	32837.6	40878.8	39269.8	28963.5	25307.8	28016.4	27142.7	22833	27237.5	30752.2	30129.3	30445.8	27255.2	39382.5		D-glucosamine-1-phosphate	1	1	0.225348		0.74872	0.0433168	0.301991		1.31618	0.0223338	0.374019		1.08026	0.0223338	0.246194
thiamine																																		thiamine	#DIV/0!	#DIV/0!	#DIV/0!		#DIV/0!	#DIV/0!	#DIV/0!		#DIV/0!	#DIV/0!	#DIV/0!		#DIV/0!	#DIV/0!	#DIV/0!
S-ribosyl-L-homocysteine-posi	35434.3	20342.4	22083.2	21920.4	26711.8	33337.6	29724.7	30666.5	21949.9	30961.3	25316.2	21596.1	40789.5	42283.8	27306.1	17347.6	25191.9	38245.4	36389.8	21942.8	34521.4	26488.9	35586	43604.5	22092	35852.1	46328.6	18977.9	38729.7	46129.5	33714.8	43717.3		S-ribosyl-L-homocysteine-posi	1	1	0.29083		1.03328	0.811737	0.391514		1.18958	0.13612	0.364054		1.29662	0.13612	0.463817
deoxyguanosine	23435.4	70597.5	60832.3	88446.1	63783.6	80519	78922.8	53865.6	47449.7	82990	64586.6	77408.1	56876	41692.1	73977.6	44784.3	204690	158761	149465	139185	85890	99947.7	113539	96068.8	76365.1	80554.1	82437.1	78729.2	89617.8	71663.4	102049	80225.1		deoxyguanosine	1	1	0.441445		0.941127	0.680862	0.382176		2.01296	0.000954053	0.877876		1.2714	0.000954053	0.422046
adenosine	31462.8	41888	60316.3	44745.7	70281.7	39393.3	49787	74583	66554.7	60076.5	58733.2	101107	63161.1	33125.5	106650	68758.6	45495	133841	115528	167005	23093.7	64282.5	62990.5	73314.8	74857.3	89406.2	102273	104858	92259	113931	157373	121701		adenosine	1	1	0.421424		1.35327	0.0901935	0.612551		1.66211	0.0786485	1.06353		2.07696	0.0786485	0.786707
1-Methyladenosine	22095.9	13908.4	14863.3	14935.8	4847.99	14414.4	13188.9	13770	12645.3	9645.58	9757.16	8292.46	18673.7	10016.5	5187.72	11774	12065.8	16181	19717.3	19008.9	17378.7	7320.41	11587.8	13956.9	4310.96	2941.46	11889.1	9929.9	4902.1	4899.04	8737.13	6155.8		1-Methyladenosine	1	1	0.470327		0.767621	0.152473	0.378463		1.04635	0.774522	0.460393		0.479944	0.774522	0.274042
guanosine	45839.6	61598.1	47139	53139.3	47283.8	32272.3	27824	40538.4	31819.6	43341.9	40552	43371.3	48773.7	41058.8	50100.2	70052.3	44623.5	55893.1	44839.8	47888.4	33971.3	32868.1	37528.6	57864.8	36464	29953.6	46334.2	51513.1	46884.5	22622.1	50109.6	43173		guanosine	1	1	0.345736		1.03778	0.764916	0.35694		0.999559	0.996972	0.322729		0.919635	0.996972	0.322727
L-arginino-succinate	217396	220217	152363	180187	288970	208705	234911	199090	200849	195366	171783	157212	206389	146931	203825	193919	184496	188200	137143	155048	151081	117448	167125	168236	84592.8	78451	115042	128465	150858	95488.9	105066	154461		L-arginino-succinate	1	1	0.266958		0.867458	0.106212	0.19575		0.745533	0.00544081	0.179524		0.53614	0.00544081	0.16857
S-methyl-5-thioadenosine	32662.3	25611.3	41497.6	37821.3	58142.4	49773.5	77968.5	60301.6	50567.8	34255.4	33822.6	25249.8	19304.4	58977.5	31112.8	78696.5	81413.9	88826.3	43567.7	45490.8	13531.2	24054.8	24502.4	20089.9	35749.6	25301.4	25183.4	31681	35636.7	25781.4	18542	12449.9		S-methyl-5-thioadenosine	1	1	0.50299		0.865048	0.495181	0.514976		0.889776	0.659221	0.672664		0.548038	0.659221	0.257963
7-methylguanosine	41680.5	42021.5	39844.9	42122.6	63999.1	20911.8	42184.6	25548.3	11926.7	29412.8	18390.3	48041.9	32532.9	45229.1	17951.4	28584.5	19907.3	12217.6	19613.7	8270.27	56087.2	13792.5	49737.8	25421.5	58896.7	23339.1	29888.7	28433.3	21030.3	56525.2	40395.8	36266		7-methylguanosine	1	1	0.458531		0.729061	0.116854	0.401241		0.64417	0.089145	0.492002		0.926053	0.089145	0.468964
dCMP	64005.9	77927.4	37598.9	57400.5	50821.1	63183.4	52403.8	37746.2	35104.2	28337	42174.7	39662.6	28047.7	25707	47520.3	29124.5	27963.1	14712.9	24419.6	17210.7	20017.6	10559.5	20400.4	19061	8533.68	17125.4	15345.7	21288.6	18304.8	5840.91	5872.74	11923		dCMP	1	1	0.35009		0.624997	0.00236034	0.211362		0.349919	7.26556e-06	0.130881		0.236313	7.26556e-06	0.121732
glutathione	2.66045e+06	3.13539e+06	3.06476e+06	2.84085e+06	3.49772e+06	4.15673e+06	3.1592e+06	3.29482e+06	2.01505e+07	2.71192e+07	2.78565e+07	2.93704e+07	3.14001e+07	2.84734e+07	2.7471e+07	2.62495e+07	9.34064e+06	7.33452e+06	4.32436e+06	5.70864e+06	2.78537e+06	2.67263e+06	1.76091e+06	1.34044e+06	1.75756e+07	2.10067e+07	2.43687e+07	2.10417e+07	2.13296e+07	1.93405e+07	2.20424e+07	1.57526e+07		glutathione	1	1	0.199621		8.44987	7.37627e-12	1.56611		1.36643	0.265227	0.902658		6.29439	0.265227	1.21882
dTMP	91311	106887	31022.8	63294.4	57446.8	126352	85089.7	58601.6	131871	102338	70805.2	93987.5	141031	79986.9	127543	84935.9	97479.7	91726.7	60711.4	77974.2	48638.7	50093	53490.4	38481.5	72949.2	31449.3	70512.4	53396.2	34278.5	74199	94987.9	41983.1		dTMP	1	1	0.561149		1.34273	0.0845939	0.631783		0.836437	0.356593	0.433816		0.764115	0.356593	0.419785
CMP	831229	624995	747106	630705	586211	825491	577384	531217	601173	603516	503774	493920	680514	431829	509206	576237	754801	861726	825026	760033	482711	493054	598702	533321	521425	574111	631458	595440	551362	465447	474966	455961		CMP	1	1	0.245563		0.821795	0.0310506	0.185556		0.991602	0.935484	0.287333		0.797516	0.935484	0.169179
UMP	117690	107058	103561	96538	109196	140582	101865	90173.7	168918	187395	139405	157696	176476	115085	158628	191500	57642.3	77029.9	108953	91978.7	58433.2	41486.2	70045.6	79482.3	132669	121140	118164	111340	140324	82089.7	131989	113064		UMP	1	1	0.201234		1.49435	0.000161959	0.316481		0.675061	0.00197927	0.218408		1.09706	0.00197927	0.22808
dAMP	104198	138216	132474	115118	136001	174599	125139	137003	136086	107618	172963	129141	152280	166586	169123	171187	173101	126047	145579	130148	112180	87280.2	88157.7	89197.4	106654	85218.5	106265	114728	104111	101368	121221	72359.1		dAMP	1	1	0.220161		1.13384	0.135073	0.252771		0.895499	0.30922	0.271417		0.763986	0.30922	0.167884
Nicotinamide ribotide	14363.3	32923.1	23349	12538.1	29368.2	21172	27500	31532.3	25390.1	12201	11956.1	33246.3	24249.5	20312.8	22733.8		19645.2	31279.1	22297.1	16402.6	14490.1		20851.9	11409	7299.6	15949.8	16742.9	14119.4	19251.4	16277.1		8453.83		Nicotinamide ribotide	1	1	0.449234		0.889932	0.51207	0.421734		0.808614	0.232717	0.370604		0.581633	0.232717	0.261763
aminoimidazole carboxamide ribonucleotide	8244.12	2654.54	6582.95	7033.28	5268.27	3637.01	2460.56	7339.48	5905.24	2852.21	5430.3	8310.18	13136	3997.24	10841.5	4277.41		3362.39	3289.49	11365.7	9067.22	5133.71	6558.75	2512.13	6601.32	3260.74	7674.56	2364.79	6100.72	10367.7	3800.14	3278.1		aminoimidazole carboxamide ribonucleotide	1	1	0.587177		1.26677	0.353767	0.85037		1.0918	0.736341	0.761853		1.00527	0.736341	0.65712
thiamine-phosphate						2178.71	8555.79		27245.1	4667.89	19606.4	13317.9	9584.87	17025		7628.76									3878.87	6931.72			7246.52					thiamine-phosphate	1	1	1.18815		2.63705	0.182434	2.64792		#DIV/0!	#DIV/0!	#DIV/0!		1.12144	#DIV/0!	1.00389
dGMP		3331.17	3821.73	29874	3392.87	17398.1	12098.8	20568.9	3320.58	18667.4	13543.8	13962	7416.81	2994.63	26563.5	8668.85	4838.14	5393.41	8922.26	12369.6	22167.7	25830.9	4388.74	16904.3	5947.36	4956.16	3401.19		16778.9	5768.66	5027.62	4112.35		dGMP	1	1	1.12298		0.919987	0.830117	0.958878		0.974888	0.946927	1.00409		0.508282	0.946927	0.537488
AMP	2.35955e+06	2.20788e+06	2.23908e+06	1.88528e+06	1.92953e+06	2.1746e+06	1.73783e+06	1.26792e+06	2.71538e+06	1.9866e+06	1.66374e+06	1.97231e+06	3.80514e+06	2.81222e+06	2.8494e+06	2.72071e+06	1.20727e+06	1.24448e+06	1.23894e+06	1.27714e+06	1.06857e+06	1.12006e+06	1.02219e+06	868381	1.31233e+06	1.60659e+06	1.23535e+06	1.39154e+06	2.18341e+06	1.45273e+06	1.66442e+06	2.04655e+06		AMP	1	1	0.253574		1.29895	0.0466916	0.415127		0.572537	2.04637e-05	0.124651		0.815922	2.04637e-05	0.227082
IMP	270085	214516	198580	202797	195435	212713	200342	132094	238831	180231	167057	162578	306550	283711	280553	228005	119892	99988.7	122200	98964.2	88758.5	107238	89987.6	70317.8	134479	116467	114523	126471	179230	114042	150164	155407		IMP	1	1	0.260761		1.13584	0.268678	0.348041		0.490204	5.21812e-06	0.12349		0.670607	5.21812e-06	0.169232
S-adenosyl-L-methioninamine						3268					1634.02												1813.51											S-adenosyl-L-methioninamine	1	#DIV/0!	#DIV/0!		0.500007	#DIV/0!	#DIV/0!		0.55493	#DIV/0!	#DIV/0!		#DIV/0!	#DIV/0!	#DIV/0!
GMP	140357	135472	128851	145430	128143	121612	140099	82426.1	118137	100700	98064.3	98989.5	130648	141558	135590	156258	78712.6	91714.5	101907	75473.9	83459.6	101182	77580.2	67344.1	92151.6	98287.3	96704.5	123781	99845	86717.2	89749.2	113259		GMP	1	1	0.220405		0.958485	0.62087	0.227859		0.66254	0.000137321	0.142154		0.782965	0.000137321	0.156512
xanthosine-5-phosphate	1655.14	3326.12				6535.13	3207.24			4000.47	3273.73	4125.62	3171.04			3832.52		3434.13	4225.09					3597.19					5338.93			6167.35		xanthosine-5-phosphate	1	1	0.787397		0.999936	0.999805	0.569009		1.01935	0.956034	0.578777		1.56297	0.956034	0.884651
riboflavin	200542	123663	138532	137095	149167	157569	186414	147864	133918	103318	122249	92593.4	117820	116142	89440.3	82534.4	135193	69103.6	76959.1	79800.2	133284	107300	182139	154814	122775	110813	130895	152584	116577	142973	95187	97830.6		riboflavin	1	1	0.236915		0.691475	0.000767377	0.164282		0.756413	0.0442777	0.291886		0.78143	0.0442777	0.185479
S-adenosyl-L-homoCysteine-posi	32919	37952.4	52723.2	38048.8	57179.3	44266.5	48002.7	53486.3	65163.1	49030.1	76907.1	60999.9	49758.4	39108.9	69604.4	20120.5	67163.7	71609.1	83826.8	101206	96964.3	85321.6	73378.4	32754	78327.6	71353.8	105551	79048	115675	74454.1	49095.7	5761.41		S-adenosyl-L-homoCysteine-posi	1	1	0.270247		1.18134	0.268836	0.461386		1.67927	0.0019703	0.568121		1.58887	0.0019703	0.803266
S-adenosyl-L-methionine	4.43642e+06	5.00355e+06	5.13142e+06	3.89516e+06	5.27336e+06	5.02409e+06	4.79074e+06	4.30046e+06	5.49547e+06	4.36874e+06	4.70557e+06	4.34423e+06	6.07233e+06	6.11419e+06	4.39915e+06	6.15363e+06	2.81194e+06	2.37373e+06	2.66233e+06	2.22384e+06	1.84814e+06	1.50716e+06	2.13087e+06	1.55682e+06	2.33979e+06	2.21143e+06	2.65867e+06	2.78951e+06	2.37913e+06	2.68619e+06	2.00867e+06	2.78736e+06		S-adenosyl-L-methionine	1	1	0.142395		1.10033	0.184913	0.20869		0.452113	3.39374e-08	0.111158		0.52465	3.39374e-08	0.0809134
folate	3.07951e+06	2.38669e+06	2.52018e+06	2.72213e+06	2.98412e+06	2.70856e+06	2.9674e+06	2.17515e+06	1.90191e+06	2.17261e+06	2.27555e+06	2.25429e+06	2.06104e+06	2.30754e+06	2.85415e+06	2.0882e+06	3.03757e+06	2.4972e+06	2.86049e+06	2.90452e+06	3.67655e+06	3.61853e+06	2.98381e+06	3.82793e+06	2.28921e+06	3.09415e+06	2.47636e+06	3.10658e+06	2.68716e+06	2.89076e+06	2.85929e+06	3.2484e+06		folate	1	1	0.166351		0.831577	0.00910246	0.143328		1.1793	0.0307806	0.223612		1.05144	0.0307806	0.174189
7,8-dihydrofolate	1964.75	2664.62	4121.44			5811.78			2629.8		2288.02		2135.09	2336.46	4147.75	2427.11	4929.82			3225.46	4153.87	3445.01		2522.61		4484.18		6703.94	3727.68			2877.5		7,8-dihydrofolate	1	1	0.661745		0.730832	0.240941	0.398752		1.00404	0.987157	0.533453		1.22185	0.987157	0.727998
5-methyl-THF	19786.5	27971.4	25709.9	25174	23263.7	26143.6	26381.2	18174.8	17715.8	18336	18958.4	19690.9	15245	16692.5	15340.5	20111.3	26144.2	20600.1	22534.7	25278.3	26440.3	26222.8	29142.2	25893.9	12801.3	18755.8	16880.6	16556.5	13347.1	19199	21811.3	23851.8		5-methyl-THF	1	1	0.201685		0.737731	0.000436024	0.13065		1.05011	0.442081	0.184898		0.743508	0.442081	0.1912
Diiodothyronine												1586.84																						Diiodothyronine	#DIV/0!	#DIV/0!	#DIV/0!		#DIV/0!	#DIV/0!	#DIV/0!		#DIV/0!	#DIV/0!	#DIV/0!		#DIV/0!	#DIV/0!	#DIV/0!
glutathione disulfide-posi	1.46994e+06	1.5342e+06	1.79671e+06	1.11778e+06	1.92947e+06	2.38844e+06	1.82309e+06	1.50251e+06	4.37596e+06	4.99867e+06	5.94375e+06	5.43406e+06	4.60917e+06	4.21733e+06	4.11654e+06	4.5538e+06	1.65114e+06	1.40513e+06	1.65248e+06	1.38349e+06	1.08373e+06	1.13074e+06	1.45485e+06	767504	4.42527e+06	4.26928e+06	4.96442e+06	4.99448e+06	5.02356e+06	4.27542e+06	5.01233e+06	4.32708e+06		glutathione disulfide-posi	1	1	0.31677		2.8203	1.17918e-08	0.734682		0.776356	0.0446876	0.249746		2.7497	0.0446876	0.652256
NAD+_posi	5.32054e+06	5.66313e+06	5.8229e+06	4.78076e+06	6.5209e+06	6.9218e+06	7.06748e+06	5.70919e+06	5.15569e+06	5.25039e+06	6.75122e+06	6.10915e+06	7.0572e+06	7.27854e+06	6.1241e+06	6.24518e+06	5.83089e+06	6.09005e+06	5.64624e+06	4.91031e+06	4.62147e+06	3.68663e+06	4.85378e+06	3.39549e+06	5.28186e+06	4.70556e+06	5.62012e+06	5.77276e+06	5.672e+06	4.59111e+06	5.45937e+06	4.7778e+06		NAD+_posi	1	1	0.18834		1.04528	0.501813	0.190138		0.816514	0.0272746	0.196048		0.87604	0.0272746	0.141251
NADH	258177	233125	325919	245053	439501	465142	364332	227869	460263	505021	482199	463279	358964	95141.9	563448	264590	282177	267302	345167	274262	260254	334254	257546	229096	422050	332732	293095	323695	310063	294509	338417	128694		NADH	1	1	0.418813		1.24766	0.234698	0.605801		0.879232	0.304887	0.288031		0.954725	0.304887	0.382058
dephospho-CoA-posi	1305.81			1342.37		4360.23	1425.58		2952.72	5001.53		1591.16	1500.27	2336.48	2606.87	4507.75	1802.93		2817.63	3764.63		2348.38					3452.81	3545.96						dephospho-CoA-posi	1	1	1.00741		1.38872	0.377267	1.18059		1.27266	0.527955	0.988647		1.65966	0.527955	1.18267
NADP+_posi	567913	532908	590363	447285	787245	789908	559858	619201	770343	935781	923387	868674	971958	1.02302e+06	984177	1.17977e+06	784785	627175	662071	709512	651894	660418	439801	555895	1.02672e+06	1.04463e+06	971413	780409	1.03089e+06	840580	905962	938623		NADP+_posi	1	1	0.277552		1.56437	4.79561e-05	0.363467		1.04022	0.66649	0.264462		1.54029	0.66649	0.340407
NADPH	22755.6	22981.2	9970.19	9063.03	39725.7	51363.5	40640	25162.3	18305.5	18652.9	21252.6	14596.4	36924.4	18360.9	34608.2	11442.1	14876	15691.8	36632.8	10220.5	20393.4	19570.2	22221.6	14857	13188.7	20790.9	16894.6	26063.4	19830.3	14206.7	9006.96	2877.6		NADPH	1	1	0.768484		0.785626	0.356501	0.539754		0.696843	0.184905	0.475597		0.554264	0.184905	0.399131
coenzyme A-posi	30593.1	25484.3	43323.3	29918.3	30103.9	30850.6	31509.1	27529	90445.5	144441	125727	77951.9	134903	100303	121441	108014	60950.3	43892.4	50517.6	19732.8	18756.2	13578.7	17891.5	15105.1	49642.4	57659.8	85677.3	70166.7	82678.8	61114.7	92758.2	67694.8		coenzyme A-posi	1	1	0.240459		3.62289	1.06401e-07	0.955308		0.964354	0.873744	0.621344		2.27584	0.873744	0.616828
FAD	73210.1	79932	60307	67815.9	90191.7	122005	111579	77586	101651	111679	86314.3	85037.4	137042	65096.8	106253	105447	71672.2	111817	103775	89822.8	64209.4	54403.2	59015.8	39561.5	69825.9	85218	57545.9	70175.5	58727.7	51453.6	60879.6	65783.2		FAD	1	1	0.355831		1.16978	0.198018	0.386775		0.870574	0.361922	0.368149		0.761191	0.361922	0.226918
acetyl-CoA-posi	78160.5	77319.3	59019	48568.7	51107.9	36817.5	54971.2	54731.9	4328.76	1793.28	20634.3	16212.4	7894.43	14221.6	5333.43	13748.6	70318.9	75345	70160.2	70353.3	41019	42604.5	43720.8	32583.9	7883.38	25443.4	17003.8	17333.1	7776.62	14698.9	14214.7	14061.4		acetyl-CoA-posi	1	1	0.345355		0.182695	6.1434e-07	0.12337		0.96833	0.820198	0.381938		0.257036	0.820198	0.116318
propionyl-CoA-posi	15169.1	24312.7	50090.5	34240.5	30854.3	38489.8	20676.9	7596.61	6889.35	41338.9	21895.4	12691.5	24142.8	6009.11	27688.1	6812.42	141535	113300	99086.1	93585.4	31627.1	51271.8	26986.8	36299.7	41897.7	41579.7	24554	36223.6	24788.3	38780.5	33554.1	13181.5		propionyl-CoA-posi	1	1	0.694264		0.665977	0.179971	0.560331		2.68117	0.0114943	2.04158		1.14961	0.0114943	0.672505
acetoacetyl-CoA-posi	10533.5	7326.77	3936.91	3692.58	3221.11	3112.54	3207.78	3500.75	4412.47	7668.29	4576.52	6345.34	5555.56	7010.76	2625.45	6935.88	7209.68	8336.94	8454.36	3766.13	3400.45	6652.67	2914.62			14678.9	5371.4	7884.24	1904.95	4991.2	6709.67	3287.19		acetoacetyl-CoA-posi	1	1	0.79091		1.17124	0.475012	0.742709		1.20819	0.462658	0.838925		1.32958	0.462658	1.13951
malonyl-CoA-posi	9234.36	3339.67	9226.98	8726.07	8948.26	9803.85	1782.61	7687.59	5906.33	5327.96	8827.83	4123.64	3598.24	5643.05	7865.51	2774.91	7673.16	10294.8	2817.74	2158.39		2535.53		4675.11	2716.13	4483.23	2480.55		3745.94	2303.91	4613.16			malonyl-CoA-posi	1	1	0.585631		0.750092	0.179692	0.418902		0.684369	0.197813	0.530368		0.461688	0.197813	0.236915
succinyl-CoA-posi	12531.8	18652	6229.68	15104.9	12156.7	9078.07	10694.6	5597.38	1984.3	5994.48	3839.94	6331.12	8235.05	6673.62	3399.96	2776.14	16678.7	16186.8	8920.31	19361.7	9358.91	12731.4	8282.32	4680.08	9311.06	8153.62	1534.16	1983.78	5735.47	8063.12	9232.05	8205.98		succinyl-CoA-posi	1	1	0.550334		0.435722	0.00254899	0.258798		1.06836	0.749387	0.611203		0.579923	0.749387	0.358935
sarcosine	4.1826e+06	4.42685e+06	4.29914e+06	4.34407e+06	4.88456e+06	4.75558e+06	4.74708e+06	4.30763e+06	4.18378e+06	4.24569e+06	3.90207e+06	4.14845e+06	4.71165e+06	3.98459e+06	4.51947e+06	3.90208e+06	3.59982e+06	3.7195e+06	4.07103e+06	3.80081e+06	4.49387e+06	4.0921e+06	4.74326e+06	4.09396e+06	4.2557e+06	4.10974e+06	3.86818e+06	3.84319e+06	3.79167e+06	4.48542e+06	3.75532e+06	3.82126e+06		sarcosine	1	1	0.0825582		0.934634	0.0523113	0.0846818		0.907277	0.0245346	0.101165		0.888252	0.0245346	0.0784421
putrescine	83566.6	49609.1	70062.8	70711.5	39962.6	20072.5	29486.5	21530.2	33813.7	77302.6	72397.9	106650	55838.3	92132.6	158740	124290	180416	195555	118461	145969	140754	158648	125896	115411	73617.7	88941.1	52068	55050.6	56476.2	24400.4	61574.2	64321.8		putrescine	1	1	0.716199		1.87315	0.0228514	1.25578		3.0678	3.23308e-06	1.66672		1.23753	3.23308e-06	0.73581
spermidine	102780	98332.7	97593.8	154852	152262	109110	130435	104571	75038.7	138420	96784.2	116770	82888.4	65388.7	134851	89868.4	135944	115921	75668.8	160100	97212.5	144377	94163.3	124197	68252.5	97059.3	79258.2	94944.3	73054.9	57763.4	71798.1	46773.3		spermidine	1	1	0.283862		0.842172	0.165253	0.285041		0.997525	0.982406	0.311556		0.619941	0.982406	0.190155
spermine	1649.3		2306.07	2369.2	1747.99		4634.32	1748.77	5278.26	2000.34	1306.6		1400.66	2997.27	2971	1743.45		4857.78			2600.44	4059.8	2914.25	1820.22		5606.16			3296.07	2303.42	3354.86	3664.93		spermine	1	1	0.664838		1.04937	0.870477	0.759934		1.34916	0.263909	0.80804		1.51294	0.263909	0.870593
dephospho-coA-posi1	1305.81			1342.37		4360.23	1425.58		2952.72	5001.53		1591.16	1339.1	2336.48	2606.87	4507.75	1802.93		2817.63	3764.63		2348.38			1551.24		3452.81	3545.96						dephospho-coA-posi1	1	1	1.00741		1.3778	0.39629	1.18175		1.27266	0.527955	0.988647		1.35167	0.527955	1.10098
coenzyme A-posi1	30593.1	25484.3	43323.3	29918.3	30103.9	30850.6	31509.1	27529	90445.5	144441	125727	77951.9	134903	100303	121441	108014	60950.3	43892.4	50517.6	19732.8	18756.2	13578.7	17891.5	15105.1	49642.4	57659.8	85677.3	70166.7	82678.8	61114.7	92758.2	67694.8		coenzyme A-posi1	1	1	0.240459		3.62289	1.06401e-07	0.955308		0.964354	0.873744	0.621344		2.27584	0.873744	0.616828
creatine	2.83611e+07	2.87916e+07	2.64882e+07	2.65733e+07	3.16937e+07	3.04686e+07	3.34809e+07	3.07305e+07	2.89153e+07	2.61712e+07	2.56421e+07	2.70348e+07	2.98515e+07	3.20841e+07	2.94124e+07	2.71286e+07	2.59532e+07	2.39157e+07	2.56015e+07	2.86474e+07	3.00274e+07	3.03106e+07	3.23406e+07	3.40561e+07	2.65796e+07	2.5451e+07	2.67456e+07	2.63471e+07	2.51861e+07	3.01409e+07	2.62143e+07	2.87275e+07		creatine	1	1	0.117837		0.956262	0.283776	0.108277		0.975757	0.643484	0.143807		0.91041	0.643484	0.0947892
N-acetyl spermine	23085.7	14137.8	9041.53	20208.6	10948.7	17622.6	20588.7	14789.4	7949.44	16533	18202.8	16446	16932.4	13207.6	24234.7	19402.7	14309.8	10389.7	20760	20364.8	15607.5	24083.9	14013.1	6702.27	14687.3	22887.4	9403.22	19132.5	10212.7	6056.1	6422.5	7313.74		N-acetyl spermine	1	1	0.427168		1.01906	0.899202	0.422091		0.967858	0.847621	0.458172		0.736952	0.847621	0.444233
N-acetyl spermidine	4555.87	4241.49	10235.8	4028.96	9194.45	11938.7	7018.29	9889.58	9437.12	23827.7	12619.3	5584.88	8860.08	15487.5	30578.6	7372.57	15589.9	23976.9	13827.6	41775.2	12868.2	4867.67	5499.04	6768.33	11160.5	2608.04	2293.49	4337.42	2668.3	3596.92	13841	5756.54		N-acetyl spermidine	1	1	0.573611		1.8619	0.0648174	1.3732		2.04855	0.0960695	1.81352		0.757118	0.0960695	0.64746
N1-Methyl-2_2-pyridone-3_5-carboximide	347516	226233	275738	300012	288584	327140	355153	320630	201379	238953	206849	305527	230276	181269	298603	256938	205722	169034	138408	169113	335704	395536	361284	455123	176716	249682	243910	223910	261857	207407	185168	213029		N1-Methyl-2_2-pyridone-3_5-carboximide	1	1	0.195169		0.786476	0.00971454	0.183012		0.913527	0.571801	0.418692		0.721702	0.571801	0.141119
N1-Methyl-2_4-pyridone-3_5-carboximide							3208.37		4593.26			3169.88				2429.93			2774.06															N1-Methyl-2_4-pyridone-3_5-carboximide	1	#DIV/0!	#DIV/0!		1.05901	#DIV/0!	#DIV/0!		0.864632	#DIV/0!	#DIV/0!		#DIV/0!	#DIV/0!	#DIV/0!
Nicotinamide Riboside	4408.54	6354.05	4428.28	5721.88	4554.5	7205.1	6950.29	7611.92	14078.6	10310.7	7176.52	3974.07	4964.66	1614.18	23840.4		2595.97		5292.61	12378.3		9532.91	4712.48	4312.66	5022.23	7740.4	12170.6	4358.18	4051.65	3168.64	8043.67	5165.6		Nicotinamide Riboside	1	1	0.315894		1.5959	0.217748	1.33449		1.09595	0.69279	0.672679		1.05264	0.69279	0.552768
Adenylosuccinate	448169	474582	477844	438375	532184	577354	665196	432338	713881	909415	822976	884930	881903	553837	933894	827429	119446	190790	133830	113490	151462	153034	222946	109696	355725	400000	473800	384398	487735	370543	476082	336316		Adenylosuccinate	1	1	0.227274		1.61349	4.18693e-05	0.359529		0.295275	2.43195e-08	0.0920668		0.811805	2.43195e-08	0.176281
cholesterol	1.51698e+06	836511	904655	808322	1.19801e+06	1.26974e+06	990833	1.50597e+06	700381	861136	877996	864449	1.02917e+06	1.1101e+06	824893	1.56561e+06	987133	1.48185e+06	1.6337e+06	989872	1.07301e+06	1.02571e+06	1.07395e+06	1.63664e+06	840220	1.30378e+06	1.17832e+06	1.21953e+06	945383	1.15543e+06	1.28986e+06	2.0502e+06		cholesterol	1	1	0.359052		0.867424	0.298835	0.32376		1.09643	0.46456	0.380262		1.10538	0.46456	0.426552
arginosuccinic acid	158382	144163	166430	116511	168214	186721	198254	153262	131782	132143	132421	175980	155961	108194	166697	143158	108024	127914	151345	128015	116712	87407	97608.8	105536	100190	87669.9	104193	87164.8	78845.4	75105	98919.5	77165.5		arginosuccinic acid	1	1	0.22101		0.8873	0.146344	0.194327		0.714092	0.00122044	0.167712		0.548984	0.00122044	0.110736
phosphocreatine	335885	263274	260072	222053	430962	360519	385570	236136	237188	280136	235080	216602	282082	186788	230702	206488	314702	333667	345261	277169	280792	288472	251455	295765	152626	154550	163556	147678	199554	155017	164768	158474		phosphocreatine	1	1	0.348823		0.751689	0.0204403	0.213924		0.957031	0.654839	0.256278		0.519639	0.654839	0.138264
Pantetheine-4-phosphate-posi																																		Pantetheine-4-phosphate-posi	#DIV/0!	#DIV/0!	#DIV/0!		#DIV/0!	#DIV/0!	#DIV/0!		#DIV/0!	#DIV/0!	#DIV/0!		#DIV/0!	#DIV/0!	#DIV/0!
Pantetheine-4-phosphate-posi_C13N15																																		Pantetheine-4-phosphate-posi_C13N15	#DIV/0!	#DIV/0!	#DIV/0!		#DIV/0!	#DIV/0!	#DIV/0!		#DIV/0!	#DIV/0!	#DIV/0!		#DIV/0!	#DIV/0!	#DIV/0!
dephospho-coA-posi1_C13N15																																		dephospho-coA-posi1_C13N15	#DIV/0!	#DIV/0!	#DIV/0!		#DIV/0!	#DIV/0!	#DIV/0!		#DIV/0!	#DIV/0!	#DIV/0!		#DIV/0!	#DIV/0!	#DIV/0!
dephospho-coA-posi2																																		dephospho-coA-posi2	#DIV/0!	#DIV/0!	#DIV/0!		#DIV/0!	#DIV/0!	#DIV/0!		#DIV/0!	#DIV/0!	#DIV/0!		#DIV/0!	#DIV/0!	#DIV/0!
dephospho-coA-posi2_C13N15																																		dephospho-coA-posi2_C13N15	#DIV/0!	#DIV/0!	#DIV/0!		#DIV/0!	#DIV/0!	#DIV/0!		#DIV/0!	#DIV/0!	#DIV/0!		#DIV/0!	#DIV/0!	#DIV/0!
coenzyme A-posi1_C13N15																																		coenzyme A-posi1_C13N15	#DIV/0!	#DIV/0!	#DIV/0!		#DIV/0!	#DIV/0!	#DIV/0!		#DIV/0!	#DIV/0!	#DIV/0!		#DIV/0!	#DIV/0!	#DIV/0!
coenzyme A-posi2_C13N15																																		coenzyme A-posi2_C13N15	#DIV/0!	#DIV/0!	#DIV/0!		#DIV/0!	#DIV/0!	#DIV/0!		#DIV/0!	#DIV/0!	#DIV/0!		#DIV/0!	#DIV/0!	#DIV/0!
NAD/NADH_posi	20.6081	24.2923	17.8661	19.5091	14.8371	14.881	19.3985	25.0547	11.2016	10.3964	14.0009	13.1868	19.6599	76.502	10.869	23.6032	20.6639	22.7834	16.358	17.9037	17.7576	11.0294	18.8463	14.8212	12.5148	14.1422	19.1751	17.8339	18.2931	15.589	16.1321	37.1254		NAD/NADH_posi					1.14684	0.725376			0.895918	0.289108			0.963941	0.289108
NAD/NADH_neg	8.11777	8.68785	6.94782	8.96557	7.56268	7.11532	6.94524	12.3853	4.91277	5.00875	7.34832	5.88761	6.43378	34.4113	5.77979	10.9394	7.1922	6.41315	4.24838	9.62664	7.17377	6.16032	8.28462	7.14276	5.80038	5.89112	6.37487	6.58238	6.49089	5.5951	8.70466	18.4764		NAD/NADH_neg					1.20972	0.63435			0.842859	0.144002			0.957863	0.144002
NADP/NADPH_posi	24.957	23.1888	59.2129	49.3527	19.817	15.3788	13.776	24.6083	42.0826	50.1681	43.4482	59.5128	26.3229	55.7174	28.4376	103.108	52.755	39.9682	18.0732	69.4204	31.9658	33.7461	19.7916	37.4164	77.8487	50.2448	57.4985	29.9427	51.9856	59.1679	100.585	326.182		NADP/NADPH_posi					1.77513	0.0483883			1.31632	0.293042			3.27174	0.293042
NADP/NADPH_neg	25.7773	13.7521	14.8804	12.0523	7.78755	9.53053	9.83184	15.7896	14.9923	23.0151	27.2693	20.8649	19.0785	27.4097	20.9864	92.2032	15.891	14.4006	11.0583	18.3787	15.8129	27.4162	9.06989	19.8754	38.7012	46.3445	17.2151	20.0273	34.3757	27.0035	17.8298	247.307		NADP/NADPH_neg					2.24694	0.0826055			1.20568	0.335739			4.10235	0.335739
GSH/GSSG_posi	1.8099	2.04367	1.70576	2.54151	1.81279	1.74035	1.73288	2.19288	4.60482	5.42529	4.68668	5.40487	6.81252	6.75152	6.67332	5.7643	5.65707	5.21983	2.61689	4.12627	2.57018	2.36361	1.21038	1.7465	3.97165	4.92043	4.90866	4.21299	4.24591	4.52366	4.39764	3.64046		GSH/GSSG_posi					2.96047	1.75669e-08			1.63743	0.0517535			2.23504	0.0517535
GSH/GSSG_neg	0.322308	0.576671	0.387065	0.402237	0.366441	0.428203	0.402297	0.572563	1.0722	1.12326	1.411	1.50627	1.39166	1.87163	1.85392	1.58064	1.33171	0.966637	0.694718	0.835911	0.536186	0.653492	0.405576	0.425191	0.903878	1.0838	1.35904	1.08904	1.2666	1.2182	1.30651	1.02506		GSH/GSSG_neg					3.41565	1.66962e-07			1.69167	0.0204439			2.67574	0.0204439

## Sheet: CALU1 Significant Changes
Sample Type	sgKEAP1_no drug/sgCTRL_no drug	t test		Sample Type	sgCTRL_Tram/sgCTRL_No drug	t test		Sample Type	sgKEAP1_Tram/sgCTRL_no drug	t test		Sample Type	sgKEAP1_Tram/sgCTRL_Tram	t test		Sample Type	sgKEAP1_Tram/sgKEAP1_No drug	t test
glutathione-nega	8.9395	1.57605e-10		putrescine	3.0678	3.23308e-06		glutathione disulfide-posi	2.7497	0.0446876		glutathione-nega	4.8798	6.36126e-08		Flavone	2.11065	0.00095703
glutathione	8.44987	7.37627e-12		propionyl-CoA-posi	2.68117	0.0114943		GSH/GSSG_neg	2.67574	0.0204439		glutathione	4.60644	1.64522e-08		Thiamine pyrophosphate	1.8173	2.58036e-07
coenzyme A-posi	3.62289	1.06401e-07		GTP-nega	2.05804	0.00496989		GSH/GSSG_posi	2.23504	0.0517535		glutathione disulfide-posi	3.5418	1.10827e-11		trans, trans-farnesyl diphosphate	1.76813	0.0252436
coenzyme A-posi1	3.62289	1.06401e-07		deoxyguanosine	2.01296	0.000954053		Flavone	1.76039	0.0467704		glutathione disulfide-nega	3.35576	2.79701e-10		propionyl-CoA-posi	1.7262	0.0344126
GSH/GSSG_neg	3.41565	1.66962e-07		Thiamine pyrophosphate	1.78626	2.41506e-05		S-adenosyl-L-homoCysteine-posi	1.58887	0.0019703		UDP-D-glucuronate	2.76258	8.75067e-11		7,8-dihydrofolate	1.67186	0.0447851
GSH/GSSG_posi	2.96047	1.75669e-08		2-Aminooctanoic acid	1.78614	0.000353369		2-Aminooctanoic acid	1.48894	0.000353369		Adenylosuccinate	2.74932	6.79672e-08		3-hydroxy-3-methylglutaryl-CoA-nega	1.62757	0.00155559
coenzyme A-nega	2.90299	1.92167e-06		GSH/GSSG_neg	1.69167	0.0204439		Thiamine pyrophosphate	1.41447	2.41506e-05		coenzyme A-posi	2.35996	0.000267287		2,3-dihydroxybenzoic acid	1.60049	4.83629e-06
glutathione disulfide-posi	2.8203	1.17918e-08		S-adenosyl-L-homoCysteine-posi	1.67927	0.0019703		glycerate	1.32809	0.00784523		coenzyme A-posi1	2.35996	0.000267287		xanthosine-5-phosphate	1.56307	0.00318947
UDP-D-glucuronate	2.72478	1.16007e-08		GSH/GSSG_posi	1.63743	0.0517535		S-adenosyl-L-homocysteine-nega	1.30197	0.0358115		acadesine	2.16762	5.51289e-05		adenosine	1.53477	0.00853672
glutathione disulfide-nega	2.59779	7.94242e-09		Flavone	1.6363	0.0467704		deoxyguanosine	1.2714	0.000954053		Taurodeoxycholic acid	2.12097	0.000100693		dihydroorotate	1.52412	0.000101712
acadesine	2.24248	0.000339674		betaine aldehyde	1.53653	0.00133306		carnitine	1.26995	0.000870717		coenzyme A-nega	1.81359	0.00156047		orotate	1.46183	2.85652e-05
putrescine	1.87315	0.0228514		carnitine	1.49418	0.000870717		2,3-Diphosphoglyceric acid	1.25933	0.000265337		SBP	1.72933	5.71627e-07		shikimate	1.45435	3.60124e-09
phosphoenolpyruvate	1.86794	0.0275401		5-phosphoribosyl-1-pyrophosphate	1.44589	0.0300191		putrescine	1.23753	3.23308e-06		D-sedoheptulose-1-7-phosphate	1.64018	5.41155e-06		D-glucosamine-1-phosphate	1.44281	0.0127449
cysteine	1.85644	0.000112302		2,3-dihydroxybenzoic acid	1.39885	0.0533302		SBP	1.23145	0.011544		UMP	1.62513	0.000381123		2-Aminooctanoic acid	1.43474	0.00236578
NADP/NADPH_posi	1.77513	0.0483883		S-adenosyl-L-homocysteine-nega	1.39628	0.0358115		Taurodeoxycholic acid	1.21544	0.0284665		D-glucosamine-6-phosphate	1.58871	0.0148294		Phosphorylcholine	1.3551	0.0289828
NADP+_nega	1.68152	1.21772e-05		2,3-Diphosphoglyceric acid	1.37958	0.000265337		betaine aldehyde	1.1737	0.00133306		GSH/GSSG_neg	1.58172	0.00376892		deoxyguanosine	1.35094	0.00531456
Adenylosuccinate	1.61349	4.18693e-05		Xanthurenic acid	1.36258	0.0181497		GTP-nega	1.16236	0.00496989		NADP+_nega	1.56142	1.60887e-06		Xanthurenic acid	1.33778	4.09224e-05
NADP+_posi	1.56437	4.79561e-05		orotate	1.32859	0.0444295		propionyl-CoA-posi	1.14961	0.0114943		UDP-nega	1.53963	1.60596e-06		Ascorbic acid	1.31837	0.0461629
4-aminobutyrate	1.54464	3.43212e-06		D-glucosamine-1-phosphate	1.31618	0.0223338		hydroxyphenylpyruvate	1.13252	0.00114098		xanthosine-5-phosphate	1.5333	0.019725		4-phosphopantothenate	1.31544	0.0442256
dTDP-nega	1.53236	0.00599093		glycerate	1.26431	0.00784523		2,3-dihydroxybenzoic acid	1.11016	0.0533302		taurine	1.53016	9.08714e-09		hypoxanthine	1.30325	8.02299e-05
3-phosphoglycerate	1.5246	0.000631672		hydroxyphenylpyruvate	1.22055	0.00114098		UMP	1.09706	0.00197927		shikimate	1.50191	6.46507e-05		2-dehydro-D-gluconate	1.30229	1.5414e-05
trehalose-6-Phosphate	1.5123	0.027037		glycine	1.22035	0.0063099		Xanthurenic acid	1.09651	0.0181497		NADP+_posi	1.48073	2.48482e-05		glycolate	1.28625	0.0149626
GDP-nega	1.50671	0.00304288		glutamate	1.18042	0.0138967		D-sedoheptulose-1-7-phosphate	1.09366	2.33917e-06		4-phosphopantothenate	1.45325	0.0182804		D-glucarate	1.28264	0.0157428
SBP	1.49984	0.000456196		folate	1.1793	0.0307806		ribose-phosphate	1.08093	0.000201077		UDP-D-glucose	1.4416	5.38803e-05		glucose-1-phosphate	1.27877	0.00321349
UMP	1.49435	0.000161959		a-ketoglutarate	1.17312	0.0455563		D-glucosamine-1-phosphate	1.08026	0.0223338		AMP	1.4251	0.00251719		carnitine	1.27241	7.05083e-05
D-sedoheptulose-1-7-phosphate	1.47965	2.38238e-07		DL-Pipecolic acid	1.14736	0.0103575		glutamate	1.07949	0.0138967		cystathionine	1.42029	0.000130461		folate	1.26439	0.00174983
UDP-N-acetyl-glucosamine	1.38523	0.000765737		glutamine	1.14037	4.46192e-05		orotate	1.07579	0.0444295		IMP	1.36802	0.00307697		Pyrophosphate	1.25829	0.0265424
UDP-nega	1.3737	2.63026e-05		2-oxobutanoate	1.11987	0.0207174		glutamine	1.05394	4.46192e-05		fructose-1,6-bisphosphate	1.36498	0.00137406		glycerate	1.25261	0.0140306
dTMP-nega	1.34454	0.00470411		aspartate	1.1	0.0162933		folate	1.05144	0.0307806		O8P-O1P	1.36006	0.00078914		indole	1.22647	0.00578915
UDP-D-glucose	1.32194	0.00155134		asparagine	1.08969	0.0309883		UDP-nega	1.05023	1.74124e-05		UDP-N-acetyl-glucosamine	1.34599	0.00121867		succinate	1.22237	1.55217e-07
CTP-nega	1.31488	0.00317409		serine	1.08857	0.004097		a-ketoglutarate	1.0462	0.0455563		3-phosphoglycerate	1.32729	0.0141859		acetoacetate	1.18926	0.0150746
AMP	1.29895	0.0466916		sarcosine	0.907277	0.0245346		taurine	1.03947	5.22599e-06		ribose-phosphate	1.2914	3.78874e-05		glycine	1.18803	0.0241226
taurine	1.25764	0.000261645		Guanidoacetic acid	0.85398	0.00622406		DL-Pipecolic acid	1.03601	0.0103575		GDP-nega	1.29123	0.0483244		Uric acid	1.18794	9.17035e-05
cystathionine	1.25486	0.000213171		ribose-phosphate	0.837021	0.000201077		asparagine	1.0266	0.0309883		D-glyceraldehdye-3-phosphate	1.26375	0.0079167		Methylmalonic acid	1.18436	9.26682e-07
fructose-6-phosphate	1.25404	0.00488688		fructose-6-phosphate	0.828777	0.00799912		serine	1.01587	0.004097		D-gluconate	1.24019	2.22003e-06		2-deoxyglucose-6-phosphate	1.16479	0.0274885
D-glyceraldehdye-3-phosphate	1.19135	0.00427096		Acetyllysine	0.828021	0.0535616		D-glyceraldehdye-3-phosphate	1.01439	0.00942747		CTP-nega	1.2116	0.0298425		DL-Pipecolic acid	1.16009	2.14862e-05
O8P-O1P	1.17672	0.00936819		CTP-nega	0.827365	0.0517968		CTP-nega	1.00243	0.0517968		UTP-nega	1.20948	0.0158042		oxaloacetate	1.15812	0.000179586
ribose-phosphate	1.17311	0.00253465		UTP-nega	0.824092	0.0383152		fructose-6-phosphate	1.00095	0.00799912		fructose-6-phosphate	1.20774	0.0123846		2-hydroxygluterate	1.15454	0.0232989
dihydroxy-acetone-phosphate	1.16122	0.0129988		NAD+_posi	0.816514	0.0272746		glycine	1.00072	0.0063099		dihydroxy-acetone-phosphate	1.2026	0.0162392		hydroxyphenylpyruvate	1.15278	0.00185899
D-gluconate	1.14402	0.0269952		Phenylpropiolic acid	0.80859	0.0106995		UTP-nega	0.996722	0.0383152		GMP	1.18176	0.0274437		quinolinate	1.15026	0.0445248
arginine	0.938586	0.0426662		D-glyceraldehdye-3-phosphate	0.802682	0.00942747		5-phosphoribosyl-1-pyrophosphate	0.966634	0.0300191		Phenylpropiolic acid	1.16287	0.0168332		2-ketohaxanoic acid	1.14771	0.015109
glutamine	0.934763	0.0160371		dihydroxy-acetone-phosphate	0.787353	0.00373706		2-oxobutanoate	0.958303	0.0207174		Ng,NG-dimethyl-L-arginine	1.16014	0.0339436		glutamate	1.14739	5.6598e-05
sarcosine	0.934634	0.0523113		glutathione disulfide-posi	0.776356	0.0446876		dihydroxy-acetone-phosphate	0.946872	0.00373706		alanine	0.943973	0.00480001		trehalose-sucrose	1.14485	0.0524275
citrate-isocitrate	0.914839	0.0496373		N6-Acetyl-L-lysine	0.763073	0.00191846		Phenylpropiolic acid	0.940286	0.0106995		serine	0.93322	0.00213094		citrulline	1.14388	0.00419418
alanine	0.914386	0.00898918		ornithine	0.760237	0.012889		O8P-O1P	0.93217	0.000228872		glutamine	0.924206	0.00188091		sn-glycerol-3-phosphate	1.14247	0.0325157
serine	0.910837	0.0104117		Geranyl-PP	0.760235	0.0112782		sarcosine	0.888252	0.0245346		DL-Pipecolic acid	0.902956	0.0142626		methionine	1.13972	0.00124204
N6-Acetyl-L-lysine	0.903413	0.00761813		riboflavin	0.756413	0.0442777		fructose-1,6-bisphosphate	0.878977	0.00244484		myo-inositol	0.880866	1.23337e-06		Methylcysteine	1.13751	0.00119815
Imidazoleacetic acid	0.899742	0.0294004		NAD+_nega	0.754247	0.000641887		NAD+_posi	0.87604	0.0272746		citrate	0.859887	0.0100677		tyrosine	1.12933	0.00277604
valine	0.894935	0.0129568		L-arginino-succinate	0.745533	0.00544081		Guanidoacetic acid	0.850555	0.00622406		malate	0.858716	0.0011872		glutamine	1.12749	0.000104444
DL-Pipecolic acid	0.893041	0.0131339		N-carbamoyl-L-aspartate-nega	0.741712	0.00780849		ornithine	0.8505	0.012889		2-oxobutanoate	0.855725	0.00766377		valine	1.12663	0.00185893
ornithine	0.890649	0.0367113		arginosuccinic acid	0.714092	0.00122044		aspartate	0.825916	0.0162933		Maleic acid	0.843999	0.00141215		Imidazoleacetic acid	1.11721	0.0312233
lysine	0.889553	0.0120167		SBP	0.712095	0.011544		AMP	0.815922	2.04637e-05		Citraconic acid	0.841326	0.0137235		serine	1.11532	0.000836464
tyrosine	0.883997	0.0215521		allantoate	0.70677	0.00865025		Adenylosuccinate	0.811805	2.43195e-08		2-keto-isovalerate	0.838339	0.00048513		Indole-3-carboxylic acid	1.11226	0.0533957
Methylcysteine	0.87762	0.00341864		Ng,NG-dimethyl-L-arginine	0.693924	9.63067e-05		Ng,NG-dimethyl-L-arginine	0.805047	9.63067e-05		Glycerophosphocholine	0.831894	0.0314395		2-Hydroxy-2-methylbutanedioic acid	1.1084	0.00469207
Citraconic acid	0.875606	0.00225554		ADP-nega	0.690398	0.00382134		NAD+_nega	0.794997	0.000641887		2-deoxyglucose-6-phosphate	0.8285	0.0346247		2-oxobutanoate	1.097	0.0316786
citrate	0.874595	0.00799728		dGDP-nega	0.690398	0.00382134		ADP-nega	0.78756	0.00382134		aconitate	0.82769	0.0284291		citrate-isocitrate	1.09674	0.0361966
2-oxobutanoate	0.873568	0.000255675		Glycerophosphocholine	0.687803	1.82272e-05		dGDP-nega	0.78756	0.00382134		glycine	0.820022	0.00506124		betaine	1.06931	0.0158478
Indoleacrylic acid	0.873285	0.0517029		O8P-O1P	0.685391	0.000228872		GMP	0.782965	0.000137321		fumarate	0.814672	0.000753499		alanine	1.06312	0.0154011
Pyroglutamic acid	0.857115	0.00691743		UDP-nega	0.682134	1.74124e-05		riboflavin	0.78143	0.0442777		CMP	0.80427	0.0452425		N-Acetyl-L-alanine	0.922386	0.00121006
oxaloacetate	0.856322	1.52007e-05		taurine	0.679319	5.22599e-06		IDP-nega	0.75511	0.000225334		Kynurenic acid	0.803225	0.00181526		UTP-nega	0.894704	0.0392278
myo-inositol	0.85507	0.000295597		UMP	0.675061	0.00197927		Acetyllysine	0.747175	0.0535616		Thiamine pyrophosphate	0.791862	0.00598181		adenine	0.894332	0.0199981
nicotinamide	0.847589	0.0285976		inosine	0.6707	0.0347869		D-glucosamine-6-phosphate	0.741684	0.0173767		N-acetyl-glutamate	0.785714	0.0101719		phenylalanine	0.890156	0.046012
methionine	0.84249	0.00290781		D-sedoheptulose-1-7-phosphate	0.666796	2.33917e-06		N6-Acetyl-L-lysine	0.713773	0.00191846		Hydroxyphenylacetic acid	0.783822	0.0367264		glucose-6-phosphate	0.885338	0.0288682
glycine	0.842335	0.0300109		pantothenate	0.664779	0.0333597		adenosine 5-phosphosulfate	0.708379	0.0201006		arginosuccinic acid	0.768786	0.00574763		UDP-N-acetyl-glucosamine	0.873641	0.0308348
isocitrate	0.834826	0.0259322		GMP	0.66254	0.000137321		N-carbamoyl-L-aspartate-nega	0.70829	0.00780849		betaine aldehyde	0.763864	0.029882		biotin	0.873207	0.0499229
allantoin	0.834572	0.00834544		IDP-nega	0.660604	0.000225334		Geranyl-PP	0.699843	0.0112782		aspartate	0.750832	7.22769e-07		allantoate	0.873098	0.0136061
glycolate	0.834033	0.0462813		fructose-1,6-bisphosphate	0.64395	0.00244484		inosine	0.682127	0.0347869		Pyrophosphate	0.732443	0.0389473		6-phospho-D-gluconate	0.867794	0.0549871
xanthosine	0.833726	0.00714607		adenosine 5-phosphosulfate	0.629908	0.0201006		IMP	0.670607	5.21812e-06		p-hydroxybenzoate	0.728365	0.0530946		D-erythrose-4-phosphate	0.857333	0.0116956
Methylmalonic acid	0.832604	3.74547e-05		N-acetyl-glutamine	0.595279	0.0121542		O-acetyl-L-serine	0.667326	0.00148558		L-arginino-succinate	0.719137	0.00443576		ATP-nega	0.854433	0.0337522
folate	0.831577	0.00910246		Taurodeoxycholic acid	0.57306	0.0284665		dephospho-CoA-nega	0.656039	0.00039709		5-methyl-THF	0.708028	0.000495499		dGTP	0.854433	0.0337522
purine	0.82877	0.0286084		AMP	0.572537	2.04637e-05		allantoate	0.654372	0.00865025		sn-glycerol-3-phosphate	0.69014	0.0335082		D-glyceraldehdye-3-phosphate	0.851459	0.00997837
2-hydroxygluterate	0.824199	0.00983652		O-acetyl-L-serine	0.554985	0.00148558		pantothenate	0.651022	0.0333597		p-aminobenzoate	0.685392	0.0132007		NAD+_posi	0.83809	0.00711197
2-Hydroxy-2-methylbutanedioic acid	0.823651	0.000293598		dephospho-CoA-nega	0.530008	0.00039709		Glycerophosphocholine	0.572179	1.82272e-05		dCMP	0.675337	0.043753		taurine	0.826525	0.000112909
succinate	0.822629	8.36764e-06		IMP	0.490204	5.21812e-06		arginosuccinic acid	0.548984	0.00122044		5-phosphoribosyl-1-pyrophosphate	0.668539	0.0225277		glutathione-nega	0.821259	0.027381
quinolinate	0.822164	0.0241398		D-glucosamine-6-phosphate	0.466848	0.0173767		L-arginino-succinate	0.53614	0.00544081		deoxyguanosine	0.631609	0.00494697		SBP	0.821056	0.00355522
CMP	0.821795	0.0310506		S-adenosyl-L-methionine	0.452113	3.39374e-08		CDP-choline	0.532422	5.32303e-05		spermidine	0.621479	0.00182964		GMP	0.816877	0.0251208
Xanthurenic acid	0.819653	0.00135722		dCDP-nega	0.411811	4.4464e-05		S-adenosyl-L-methionine	0.52465	3.39374e-08		acetyl-CoA-nega	0.552153	0.0160483		dihydroxy-acetone-phosphate	0.815413	0.0013202
acetoacetate	0.812627	0.000432129		CDP-choline	0.402974	5.32303e-05		N-acetyl-glutamine	0.490503	0.0121542		3-phospho-serine	0.544816	0.0116061		glyoxylate	0.802316	0.00893853
aconitate	0.800945	0.000296819		cytidine	0.400242	0.0301248		dCDP-nega	0.487568	4.4464e-05		phosphocreatine	0.54297	2.82801e-08		fructose-6-phosphate	0.798177	0.00664995
5-phosphoribosyl-1-pyrophosphate	0.793734	0.0476033		Kynurenic acid	0.373677	9.30678e-09		dTMP-nega	0.422761	7.70224e-08		succinyl-CoA-posi	0.542818	0.0202862		3-phosphoglycerate	0.796986	0.0510863
Hydroxyphenylacetic acid	0.792675	0.0176443		dTMP-nega	0.356414	7.70224e-08		3-hydroxybutyryl-CoA	0.406317	3.55483e-08		1-Methyladenosine	0.458684	0.000771193		malate	0.793088	1.22258e-05
2-dehydro-D-gluconate	0.788904	0.000284165		dUTP-nega	0.353663	1.72199e-05		dTDP-nega	0.402096	2.93015e-07		propionyl-CoA-posi	0.428773	0.0171722		O8P-O1P	0.792177	0.000336172
N1-Methyl-2_2-pyridone-3_5-carboximide	0.786476	0.00971454		dCMP	0.349919	7.26556e-06		dUTP-nega	0.363072	1.72199e-05		CDP-ethanolamine	0.416696	1.82503e-05		N6-Acetyl-L-lysine	0.790085	0.0153943
guanine	0.781247	0.0237895		3-hydroxybutyryl-CoA	0.34291	3.55483e-08		dTTP-nega	0.330194	3.96247e-07		putrescine	0.403392	4.36435e-06		Acetyllysine	0.785213	0.0183669
Thiamine pyrophosphate	0.778339	0.0248826		N-acetyl-glutamate	0.326072	8.23445e-09		Kynurenic acid	0.300147	9.30678e-09		N-acetyl spermidine	0.369587	0.0507893		GSH/GSSG_neg	0.783377	0.0169531
indole	0.77643	0.00125223		dTTP-nega	0.322238	3.96247e-07		dCTP-nega	0.295372	1.99907e-10		acetyl-CoA-posi	0.265442	1.72083e-05		NAD+_nega	0.780935	0.00158112
aspartate	0.76497	7.22947e-06		dCTP-nega	0.316199	1.99907e-10		dATP-nega	0.294008	6.99661e-08		Carbamoyl phosphate	0.178299	0.0025764		2-keto-isovalerate	0.780091	0.000276932
Ascorbic acid	0.752461	0.00519298		dATP-nega	0.312277	6.99661e-08		N-acetyl-glutamate	0.256199	8.23445e-09		Cystine	0.129763	0.00240131		UDP-nega	0.764531	7.27762e-05
phosphocreatine	0.751689	0.0204403		dTDP-nega	0.295875	2.93015e-07		dCMP	0.236313	7.26556e-06						CTP-nega	0.762377	0.00167855
2-oxo-4-methylthiobutanoate	0.751617	0.0285517		Adenylosuccinate	0.295275	2.43195e-08		cytidine	0.148008	0.0301248						fructose-1,6-bisphosphate	0.762363	0.000537038
Uric acid	0.749862	1.89711e-05														GSH/GSSG_posi	0.754963	0.00132355
allantoate	0.749483	0.013011														IDP-nega	0.747789	0.00087514
D-glucosamine-1-phosphate	0.74872	0.0433168														Maleic acid	0.746488	0.00013162
5-methyl-THF	0.737731	0.000436024														Atrolactic acid	0.745407	0.0123983
hypoxanthine	0.737326	0.000483647														glutathione	0.74491	0.00038211
orotate	0.735918	0.00134583														fumarate	0.740326	2.33822e-05
N-carbamoyl-L-aspartate-nega	0.731589	0.00115936														D-sedoheptulose-1-7-phosphate	0.739137	4.45433e-05
N-acetyl-glutamate	0.731221	0.00109387														ADP-nega	0.737411	0.000292919
4-Pyridoxic acid	0.724553	0.012545														dGDP-nega	0.737411	0.000292919
3-hydroxybutyryl-CoA	0.723589	0.0187534														spermidine	0.736121	0.0358979
sn-glycerol-3-phosphate	0.719927	4.24068e-05														UMP	0.734136	0.00157061
Geranyl-PP	0.714524	0.00302574														dUMP-nega	0.724998	0.0152814
3-methylphenylacetic acid	0.709652	0.0152189														CDP-ethanolamine	0.704471	0.000134838
Kynurenic acid	0.70691	0.000389176														phosphocreatine	0.691295	7.38851e-05
Pyrophosphate	0.705559	0.012233														GDP-nega	0.688442	0.00235661
2,3-dihydroxybenzoic acid	0.69364	0.00137037														dAMP	0.673806	0.000263692
riboflavin	0.691475	0.000767377														Nicotinamide ribotide	0.65357	0.0446113
2-deoxyglucose-6-phosphate	0.670937	0.00110617														O-acetyl-L-serine	0.652219	0.000313869
dihydroorotate	0.659402	0.000648158														FAD	0.650715	0.000993375
dCMP	0.624997	0.00236034														coenzyme A-posi	0.628183	0.000654215
trans, trans-farnesyl diphosphate	0.624251	0.00844392														coenzyme A-posi1	0.628183	0.000654215
malonyl-CoA-nega	0.579879	0.0176735														AMP	0.628142	0.00321185
CDP-ethanolamine	0.51568	0.000279801														1-Methyladenosine	0.625235	0.0390054
succinyl-CoA-posi	0.435722	0.00254899														arginosuccinic acid	0.618713	2.12486e-05
Carbamoyl phosphate	0.41849	0.00313937														L-arginino-succinate	0.618059	8.71647e-05
acetyl-CoA-nega	0.344129	7.62261e-05														4-aminobutyrate	0.615691	2.23395e-08
cytidine	0.28879	0.00150005														malonyl-CoA-posi	0.615508	0.0407098
acetyl-CoA-posi	0.182695	6.1434e-07														Kynurenine	0.612432	0.0125796
Cystine	0.10486	1.56781e-06														N-acetyl-glutamine	0.595565	0.0210864
																IMP	0.590405	0.000639253
																inosine	0.569752	0.00142038
																dTMP	0.569077	0.00255663
																Carbamoyl phosphate	0.565973	8.40566e-07
																3-hydroxybutyryl-CoA	0.56153	0.00775607
																malonyl-CoA-nega	0.559155	0.0278139
																pantothenate	0.554665	0.000730609
																coenzyme A-nega	0.553259	0.000170489
																3-phospho-serine	0.550057	0.0217103
																Glycerophosphocholine	0.545355	2.13503e-11
																dephospho-CoA-nega	0.505328	0.0038047
																Adenylosuccinate	0.503135	9.95971e-07
																S-adenosyl-L-methionine	0.476811	5.09505e-07
																CDP-choline	0.443176	1.24995e-05
																Kynurenic acid	0.42459	9.23432e-08
																dCDP-nega	0.413831	0.000176948
																N-acetyl spermidine	0.406637	0.0285957
																dCMP	0.378103	2.59302e-05
																N-acetyl-glutamate	0.350372	2.04495e-08
																dTTP-nega	0.324992	2.51463e-08
																dUTP-nega	0.323647	1.26521e-05
																dTMP-nega	0.314428	7.4733e-07
																dATP-nega	0.306384	3.74637e-08
																dCTP-nega	0.302783	1.33615e-11
																dTDP-nega	0.262402	6.85145e-06

## Sheet: HCC364 Data
Sample Type	No inf_DMSO_1	No inf_DMSO_2	No inf_DMSO_3	No inf_DMSO_4	sgGFP_DMSO_1	sgGFP_DMSO_2	sgGFP_DMSO_3	sgGFP_DMSO_4	sgKEAP1-1_DMSO_1	sgKEAP1-1_DMSO_2	sgKEAP1-1_DMSO_3	sgKEAP1-1_DMSO_4	sgKEAP1-2_DMSO_1	sgKEAP1-2_DMSO_2	sgKEAP1-2_DMSO_3	sgKEAP1-2_DMSO_4	No inf_Tram_1	No inf_Tram_2	No inf_Tram_3	No inf_Tram_4	sgGFP_Tram_1	sgGFP_Tram_2	sgGFP_Tram_3	sgGFP_Tram_4	sgKEAP1-1_Tram_1	sgKEAP1-1_Tram_2	sgKEAP1-1_Tram_3	sgKEAP1-1_Tram_4	sgKEAP1-2_Tram_1	sgKEAP1-2_Tram_2	sgKEAP1-2_Tram_3	sgKEAP1-2_Tram_4		Sample Type	sgCTRL_no drug/sgCTRL_no drug	t test	stdev		sgKEAP1_no drug/sgCTRL_no drug	t test	stdev		sgCTRL_Tram/sgCTRL_No drug	t test	stdev		sgKEAP1_Tram/sgCTRL_no drug	t test	stdev
glyoxylate	54450.2	36487.4	45518.1	50982.2	70814.6	65257.9	42828.9	37234.1	23455.6			28908.7	35201.8	43793.7	33614.4	39565.2	27826.1	27227.4	61717.1	33702.7	36088.3	32649	9056.98	56955.6	25628.6	16373	16228.1	21202	26147.1	22404.3	18826	27425.4		glyoxylate	1		0.351789		0.675761	0.0149856	0.221642		0.706744	0.0662234	0.37733		0.43173	0.0662234	0.138299
glycolate	11403.1			5656.8	3307.36	2920.79		4280.66		6897.27	11135.1	18909.6	12778.9	5467.57	17192	18438.3		20455.1	3824.86	5659.18	15772.8	8260.53	9657.74	12845.6	9317.18	3826.26	12738.6	12569.3	7903.37	20017.6	9566.82			glycolate	1		0.886809		2.35305	0.0234169	1.7781		1.98143	0.0958304	1.63306		1.96753	0.0958304	1.5358
pyruvate	76491	16927.8	7653.84	23722.9	38465.7	106639	9009.71	63772.9	39656.7	29143.3	67422.7	20564	48954	18763.7	11061.7	15982.2	48065.2	61359.7	60394.7	32268.8	9392.78	85661.4	56794	41481.9	84086.5	62109.7	73569.2	15333	7048.23	72914.9	30494.4	101826		pyruvate	1		1.18904		0.734055	0.443516	0.764143		1.15389	0.667914	1.10493		1.30553	0.667914	1.35829
lactate	1.29924e+07	1.5346e+07	2.47506e+07	2.72107e+07	2.65042e+07	2.40786e+07	2.74618e+07	3.01621e+07	1.58914e+07	1.73932e+07	1.27339e+07	1.18709e+07	2.41202e+07	1.46189e+07	2.30972e+07	1.85981e+07	2.48428e+07	2.32157e+07	3.47402e+07	2.01241e+07	2.39677e+07	2.59035e+07	2.4523e+07	3.77239e+07	2.22684e+07	2.46059e+07	2.47139e+07	2.22444e+07	2.39604e+07	2.14888e+07	2.38527e+07	2.96584e+07		lactate	1		0.366928		0.733788	0.0347178	0.269455		1.14076	0.294427	0.392273		1.02274	0.294427	0.286445
2-oxobutanoate	174653		268943	3671.6	6708.73	240727	209990	247810		213789	4996.04	165849	179068	150985	5257.65	199144	5221.89	219504	259852	6633.4	208940	9702	4902.49	293699	218439	217530	203330		241355	190159	210731	250670		2-oxobutanoate	1		0.970503		0.797472	0.550414	0.767558		0.765635	0.553462	0.949498		1.32947	0.553462	0.921234
acetoacetate			3748.87	194803	234881	215431	205294	221696	200346	160665	3881.54	195137	258695	175473	208678	8257.36		172954		200855	229027	198933	2969.81	225041	204193	204730	3449.96	153261	174201	192228	175727	164822		acetoacetate	1		0.686908		0.844305	0.581543	0.666137		0.957175	0.8803	0.664302		0.887164	0.8803	0.564828
glycerate	18530.8	33024.7	16689.1	21322	40941.6	19157.7	39886.8	38898.8	32696.6	35619.7	30224.1	31206.5	10637		27244.9	49328.5	62547.2	71450.9	32369.4	88641.2		123984	56672	63093.6	102491	49931.6	31930.4	93541.1	49160.7	24514.8	75269.6	99482		glycerate	1		0.526348		1.08536	0.676252	0.56969		2.4951	0.00173955	1.36895		2.30386	0.00173955	1.38294
uracil	147636	162481	124645	124351	109188	80679.6	87023.6	94588.1			180340	44384.5	128942	175490	122591	120775	6349.57	46903.8	80051.9			5296.96		96343.9	73759.6	72581.8	105487	57947.2	56328.6	87763.2	61944.4	82415.6		uracil	1		0.352868		1.10686	0.562972	0.504585		0.403951	0.00444833	0.37147		0.642846	0.00444833	0.215558
fumarate	4.0977e+06	4.16807e+06	5.07752e+06	4.2277e+06	5.56923e+06	4.91496e+06	5.32297e+06	4.31111e+06	3.34495e+06	2.92465e+06	3.28615e+06	3.17355e+06	3.17506e+06	2.83686e+06	3.34861e+06	3.4715e+06	2.75086e+06	2.22113e+06	4.44836e+06	3.21552e+06	2.80576e+06	2.38721e+06	2.45647e+06	4.76919e+06	1.79292e+06	1.93613e+06	2.13586e+06	1.80519e+06	2.21374e+06	2.1851e+06	2.15885e+06	2.458e+06		fumarate	1		0.17398		0.678212	7.04793e-06	0.095421		0.664765	0.0013967	0.220468		0.44272	0.0013967	0.0726668
Maleic acid	3.7927e+06	4.07862e+06	4.55876e+06	4.62744e+06	5.11953e+06	4.66322e+06	5.05369e+06	4.36749e+06	3.09503e+06	2.86379e+06	3.18905e+06	2.59011e+06	3.24526e+06	3.008e+06	3.07272e+06	2.78179e+06	2.64553e+06	2.20526e+06	4.41883e+06	3.24415e+06	2.5669e+06	2.61458e+06	2.58914e+06	4.76004e+06	1.65828e+06	1.79222e+06	1.95334e+06	1.78564e+06	2.01214e+06	2.1367e+06	2.06934e+06	2.32363e+06		Maleic acid	1		0.140703		0.657606	4.80786e-07	0.0815785		0.690663	0.00204392	0.220231		0.43383	0.00204392	0.0643404
2-keto-isovalerate	3.72785e+06	3.52247e+06	4.24424e+06	4.09183e+06	4.93789e+06	4.73961e+06	4.68022e+06	4.59133e+06	3.08768e+06	2.60492e+06	3.55817e+06	2.48361e+06	3.51499e+06	2.90587e+06	3.15243e+06	2.69275e+06	2.73764e+06	2.00537e+06	4.46545e+06	3.14558e+06	2.32905e+06	2.40883e+06	2.52988e+06	4.49529e+06	1.91366e+06	1.89492e+06	1.95395e+06	1.65339e+06	2.04509e+06	2.29784e+06	2.24103e+06	2.22978e+06		2-keto-isovalerate	1		0.166383		0.694951	5.04245e-05	0.123998		0.698329	0.00444105	0.237565		0.469942	0.00444105	0.0750398
Guanidoacetic acid	305736	320783	451628	269693	372287	47284.2	345237	304856	278221	291806	487491	16851.2	298807	484871	312916	339439	302422	286486	279388	276132	462363	72400.6	216757	364599	85462.7	88987.2	309694	36372.6	281371	303443	241419	336670		Guanidoacetic acid	1		0.546617		1.03843	0.863354	0.629397		0.935075	0.736897	0.517997		0.696347	0.736897	0.480204
succinate	7.00961e+06	7.56518e+06	9.13767e+06	1.00117e+07	9.80848e+06	9.12016e+06	9.74059e+06	1.08563e+07	6.7412e+06	5.74507e+06	4.50418e+06	4.80721e+06	8.45525e+06	6.72456e+06	9.10887e+06	7.97299e+06	1.31845e+07	1.3366e+07	1.0713e+07	1.18866e+07	1.23264e+07	1.21131e+07	1.15065e+07	1.43754e+07	1.19919e+07	1.19509e+07	1.24933e+07	1.13046e+07	1.48704e+07	1.39355e+07	1.5009e+07	1.62315e+07		succinate	1		0.198228		0.738015	0.00632866	0.210794		1.35798	0.000101221	0.22872		1.4715	0.000101221	0.283821
Methylmalonic acid	8.76524e+06	9.80672e+06	1.06137e+07	1.19266e+07	1.13573e+07	1.07678e+07	1.2351e+07	1.30463e+07	7.61577e+06	6.23209e+06	5.33631e+06	6.50295e+06	9.75938e+06	7.25246e+06	1.08718e+07	9.54169e+06	1.5845e+07	1.61397e+07	1.2993e+07	1.42633e+07	1.48849e+07	1.35471e+07	39668.1	1.71549e+07	1.40784e+07	1.40713e+07	1.47338e+07	1.26016e+07	1.73937e+07	1.59363e+07	1.77136e+07	1.92368e+07		Methylmalonic acid	1		0.177721		0.712051	0.00211974	0.19795		1.18314	0.325555	0.514589		1.41892	0.325555	0.269959
3-S-methylthiopropionate															2623.75									9557.35			3579.4							3-S-methylthiopropionate	#DIV/0!		#DIV/0!		#DIV/0!	#DIV/0!	#DIV/0!		#DIV/0!	#DIV/0!	#DIV/0!		#DIV/0!	#DIV/0!	#DIV/0!
nicotinate	11871.1	3695.4	11878.7	175548	2387.33	14311.2	73410.4	61413.8	6847.25	40718.4	36959	30997.5	85207.9	101571	13701.2	354520	8509.5	173802	35266	15969.1	120438	25507.1	52978.1	179274	23073.4	28257.4	48209.2	7420.64	92279.7	29022.3	133878	138186		nicotinate	1		1.89853		1.89137	0.40019	3.61764		1.72558	0.342134	2.8142		1.41129	0.342134	2.2264
taurine	1.26018e+08	1.27988e+08	1.30193e+08	1.07998e+08	1.21937e+08	1.22975e+08	1.07909e+08	9.64392e+07	1.57974e+08	1.38897e+08	1.66302e+08	1.37204e+08	1.48136e+08	1.54942e+08	1.50513e+08	1.42612e+08	8.89743e+07	8.5654e+07	9.89321e+07	9.49732e+07	1.04374e+08	8.91289e+07	9.35634e+07	9.90204e+07	1.16186e+08	1.29011e+08	1.19308e+08	1.21224e+08	1.1528e+08	1.20996e+08	1.0955e+08	1.2864e+08		taurine	1		0.144983		1.27099	4.93631e-05	0.155481		0.801544	0.000254042	0.0979799		1.0199	0.000254042	0.118646
Pyroglutamic acid	1.69124e+06	1.78434e+06	1.91783e+06	2.18657e+06	2.0691e+06	1.84239e+06	2.12326e+06	2.11456e+06	1.65715e+06	1.71284e+06	1.49308e+06	1.57514e+06	2.07677e+06	1.67905e+06	2.0898e+06	2.06359e+06	2.40365e+06	2.43596e+06	2.20691e+06	2.43517e+06	2.3224e+06	2.10922e+06	2.58493e+06	2.89757e+06	2.38086e+06	2.50032e+06	2.50289e+06	2.25455e+06	2.67165e+06	2.85398e+06	2.88364e+06	3.13462e+06		Pyroglutamic acid	1		0.130995		0.912148	0.130994	0.150175		1.2331	0.000749857	0.167632		1.34669	0.000749857	0.194662
Citraconic acid	1.0538e+06	471272	1.37457e+06	3346.36	1.36585e+06	1.29578e+06	1.26788e+06	1.23654e+06	7411.53		7496.47	12413.5				1.49759e+06	9919.98	7211.96	1.32815e+06	1.29206e+06	1.35592e+06	1.23239e+06	677862	1.54937e+06	821483	1.38124e+06	1.0495e+06	8943.32	1.45775e+06	1.29867e+06	1.21192e+06	1.5397e+06		Citraconic acid	1		0.703959		0.377966	0.11062	0.761485		0.923638	0.789182	0.76916		1.08677	0.789182	0.731141
2-ketohaxanoic acid	160932	158356	179071	157957	176759	202893	181761	152654	200909	141800	169482	123359	138609	129679	129858	134256	148166	157473	169768	195435	174314	7449.81	144444	187729	125177	129948	150886	139730	134415	130962	153398	177546		2-ketohaxanoic acid	1		0.139497		0.852282	0.0377915	0.174686		0.86456	0.307287	0.358137		0.833389	0.307287	0.12995
N-Acetyl-L-alanine	1.7321e+06	1.58838e+06	1.68163e+06	2.06498e+06	2.48869e+06	2.62021e+06	2.34126e+06	2.63002e+06	1.58555e+06	2.04508e+06	1.80066e+06	1.90391e+06	2.16487e+06	1.8304e+06	2.22674e+06	2.16359e+06	3.02688e+06	2.71084e+06	3.111e+06	2.79917e+06	2.99979e+06	3.01269e+06	3.01089e+06	2.97093e+06	2.57825e+06	2.83665e+06	2.71104e+06	2.69477e+06	3.26132e+06	3.13874e+06	3.03391e+06	3.39214e+06		N-Acetyl-L-alanine	1		0.286419		0.916811	0.318803	0.212771		1.37877	0.000173836	0.285959		1.37904	0.000173836	0.311311
oxaloacetate	564833	633530	725559	713594	8521.92	20520.2	719382	676247	591797	34076.2	398968	440622	676964	471862	648456	580833	940613	19889.1	671017	758015	928482	24330.5	851563	964137	796214	982102	979656	32936	945209	8080.93	967248	24019.9		oxaloacetate	1		0.860814		0.946184	0.838144	0.704401		1.26977	0.453861	1.09899		1.16574	0.453861	1.17565
Hydroxyisocaproic acid				60561.4	5980.26	58659	77482.4	58061		8015.4	11364.2		74725.5		60398.2	50603.8	51185.9	3185.43		6804.48	5188.88			151373	59601.2		8300.05	39218	70175.1	74828.5	97123.7	120695		Hydroxyisocaproic acid	1		0.73289		0.786622	0.554046	0.703255		0.835061	0.787581	1.2925		1.28736	0.787581	0.971387
malate	2.25944e+07	2.23579e+07	2.75297e+07	2.61062e+07	3.04073e+07	3.28262e+07	2.93992e+07	2.56212e+07	1.68199e+07	1.26952e+07	1.56648e+07	1.41419e+07	1.88918e+07	1.72722e+07	1.95331e+07	1.7593e+07	1.5126e+07	1.33616e+07	2.75551e+07	1.69794e+07	1.46001e+07	1.34951e+07	1.27105e+07	2.82567e+07	9.05184e+06	9.70308e+06	1.05989e+07	1.02418e+07	1.15275e+07	1.27082e+07	1.12237e+07	1.17258e+07		malate	1		0.192372		0.61156	8.05381e-06	0.119216		0.655244	0.00302433	0.252368		0.400203	0.00302433	0.0697794
hypoxanthine	636265	791006	665395	872460	765442	738793	760743	831321	867284	831116	545184	716586	962894	695778	1.03106e+06	990281	1.24302e+06	1.14345e+06	878900	1.10344e+06	1.16685e+06	1.50065e+06	1.15643e+06	1.00442e+06	1.2413e+06	1.18571e+06	1.07807e+06	1.13434e+06	1.30407e+06	1.19416e+06	1.26697e+06	1.32896e+06		hypoxanthine	1		0.146956		1.09548	0.28829	0.249044		1.51733	6.2977e-05	0.286015		1.60582	6.2977e-05	0.201235
anthranilate	4761.65	7806.77				21375.9	21238.6		19028.6	15970	18159.6	26016.8	4696.22			9690.22		23166.2	21308.9	5979.3		9185.92		7232.92			12017.8	8054.19	18998.8		21884.4			anthranilate	1		0.89824		1.13032	0.736492	0.900256		0.969477	0.942821	0.855704		1.1046	0.942821	0.8384
p-aminobenzoate	22006.5		6199.11	21078.3	3041.52	7156.28	28954.2	13972.7	45246.2	4439.48	5965.53				16048.5	4750.34	17219.2	10947.2	17765	41238.7	24155.1	20625.6	5537.32	26562.9			18952.6	29835.4		31306.9	12253.2	7104.56		p-aminobenzoate	1		0.936251		1.04513	0.934254	1.3771		1.40169	0.289825	1.18497		1.35959	0.289825	1.15673
p-hydroxybenzoate	70810.8	110901	156212	84283.4	141398	120070	91177.1	128033	106574	64664.8	88275.9	21640.9	118334	98908.1	91244.1	126831	105661	190918	140227	125095	191749	146390	195254	210300	157615	103047	215703	154966	120375	138726	171089	176296		p-hydroxybenzoate	1		0.367921		0.793536	0.160805	0.361179		1.44602	0.0107949	0.508123		1.37096	0.0107949	0.472531
acetylphosphate	590702	653590	593494	480667	543147	697197	630929	626596	556762	626003	811302	342412	671021	530780	576078	533493	723324	750815	618756	751740	1.06888e+06	912420	604775	565357	687748	452989	787812	862423	646643	739029	599758	629636		acetylphosphate	1		0.157706		0.96502	0.696862	0.24706		1.24495	0.0382465	0.313959		1.12244	0.0382465	0.242884
Carbamoyl phosphate	6.15143e+06	6.04432e+06	6.05027e+06	4.74848e+06	5.1484e+06	6.54274e+06	6.37098e+06	5.61747e+06	2.02725e+06	2.02521e+06	2.46635e+06	1.87848e+06	1.68017e+06	1.79485e+06	1.87943e+06	1.81499e+06	6.11986e+06	5.21108e+06	8.82523e+06	7.44003e+06	6.98429e+06	5.98985e+06	6.75607e+06	8.2117e+06	1.05797e+06	1.00571e+06	1.00127e+06	1.0559e+06	956299	1.06552e+06	835373	1.1326e+06		Carbamoyl phosphate	1		0.149921		0.333519	1.3462e-10	0.0542468		1.18991	0.0355032	0.240774		0.173772	0.0355032	0.0239555
a-ketoglutarate	6.24259e+06	5.7726e+06	6.52228e+06	6.8773e+06	6.91399e+06	7.23484e+06	7.99137e+06	8.06973e+06	5.82801e+06	6.53502e+06	4.86846e+06	5.76644e+06	7.8716e+06	6.37549e+06	8.53638e+06	7.24394e+06	1.07118e+07	9.29657e+06	9.00482e+06	9.23736e+06	9.18145e+06	1.00307e+07	9.69449e+06	9.23874e+06	9.75692e+06	9.86698e+06	9.94573e+06	8.66031e+06	9.95225e+06	9.61504e+06	1.0066e+07	1.06424e+07		a-ketoglutarate	1		0.162996		0.95327	0.535009	0.204868		1.37342	3.07363e-06	0.178422		1.41134	3.07363e-06	0.181249
Phenylpropiolic acid	1.64188e+07	1.68961e+07	1.69428e+07	1.85189e+07	1.91499e+07	1.98291e+07	2.05171e+07	2.17955e+07	1.61079e+07	1.94261e+07	1.5255e+07	1.6599e+07	2.1015e+07	1.77098e+07	2.30218e+07	1.91033e+07	2.88568e+07	2.41895e+07	2.35843e+07	2.50575e+07	2.51918e+07	2.73719e+07	2.58073e+07	2.5698e+07	2.47285e+07	2.78895e+07	2.64016e+07	2.48435e+07	2.66983e+07	2.71328e+07	2.6393e+07	2.99084e+07		Phenylpropiolic acid	1		0.14505		0.987803	0.845492	0.173048		1.37109	2.22371e-06	0.16726		1.42599	2.22371e-06	0.171069
2-oxo-4-methylthiobutanoate						4553.39									3157.44						6457.08			2187.83										2-oxo-4-methylthiobutanoate	1		#DIV/0!		0.693427	#DIV/0!	#DIV/0!		0.949283	#DIV/0!	#DIV/0!		#DIV/0!	#DIV/0!	#DIV/0!
2-Hydroxy-2-methylbutanedioic acid	524936	669603	725868	732337	649400	691392	731873	699683	700928	577239	637272	624530	798987	551789	616954	689156	593746	659795	681741	698610	618717	556575	596616	719268	566201	577230	659176	644623	701277	683398	743844	793366		2-Hydroxy-2-methylbutanedioic acid	1		0.143432		0.957929	0.452364	0.151156		0.944697	0.256982	0.128114		0.989682	0.256982	0.152021
3-methylphenylacetic acid	163426	148528	190317	154228	132152	4576.19	91709.3	4158.59	195188	275853	201279	164670	211776	193387	279373	174692	81131	63015.2	5170.06	90986.6	87100.9	62021.5	73706.6	120827	66102.5	6847.08	71389.6	72262.4	63528.9	72435.4	116046	3902.46		3-methylphenylacetic acid	1		0.910997		1.9078	0.00418387	1.28864		0.656802	0.193068	0.517724		0.531455	0.193068	0.477629
xanthine	1.2518e+06	1.28189e+06	1.876e+06	2.38238e+06	1.58639e+06	1.4537e+06	2.12513e+06	2.09895e+06	1.73012e+06	1.99184e+06	1.09438e+06	1.3533e+06	2.21064e+06	1.41066e+06	2.69461e+06	2.0625e+06	1.72792e+06	1.86348e+06	211278	1.56308e+06	1.58315e+06	308747	267938	4.11437e+06	1.76632e+06	229292	2.06334e+06	1.55657e+06	2.29445e+06	2.30418e+06	2.49982e+06	3.09279e+06		xanthine	1		0.341453		1.03499	0.800348	0.389311		0.828099	0.538841	0.7598		1.12454	0.538841	0.552738
Hydroxyphenylacetic acid	186559	4989.4	235613	157190	136919	158399	141056	104149	199827	216174	260761	6010.43	245840	179873	276116	200572	116643	104120	124631	85197.3	4137.89	67811.1	18401.6	149119	126122	66177.1	99048.2	7867.96	3403.06	192482	119621	154610		Hydroxyphenylacetic acid	1		0.674313		1.4092	0.153315	0.900964		0.595675	0.0772502	0.461455		0.683927	0.0772502	0.577567
2,3-dihydroxybenzoic acid	2.79559e+06	1.53123e+06	1.80571e+06	1.34847e+06	1.07404e+06	1.20364e+06	720215	911620	1.78876e+06	984389	2.70848e+06	1.25935e+06	915863	1.95859e+06	1.99354e+06	950045	404219	560448	538673	612121	824233	560478	421626	467798	690885	815598	656917	1.30313e+06	566902	468332	778667	642979		2,3-dihydroxybenzoic acid	1		0.64731		1.10259	0.659581	0.678889		0.385373	0.00227919	0.19961		0.52003	0.00227919	0.296889
orotate	1.69556e+06	1.39089e+06	1.35034e+06	728170	847266	780967	601007	484029	990949	935617	1.50737e+06	1.1217e+06	798111	1.39629e+06	212501	963627	524191	747484	489699	757969	951306	554654	674192	558223	690468	819256	720675	728525	677238	769155	710497	814342		orotate	1		0.625521		1.00609	0.977424	0.599448		0.667373	0.0650566	0.335182		0.752728	0.0650566	0.337425
dihydroorotate	901297	805577	797976	551321	457125	459619	375256	268613	625507	757931	1.04271e+06	659598	765471	871808	742765	723877	327644	386409	232893	379624	444575	266953	299076	465308	326338	381159	379791	325010	336693	440668	397417	390741		dihydroorotate	1		0.564053		1.34069	0.0544877	0.581137		0.60702	0.0201042	0.281546		0.644999	0.0201042	0.266587
allantoin	327043	292107	302308	474707	389542	333557	418436	431743	300792	310238	232191	201205	421631	251919	441395	289852	540501	513837	394777	473422	474556	426213	323229	838075	563126	435013	458898	433990	570834	521500	560388	724990		allantoin	1		0.254836		0.824809	0.112701	0.274494		1.34187	0.0502564	0.47935		1.43756	0.0502564	0.366707
Aminoadipic acid	298590	284236	368877	285403	337003	330700	331741	384993	457117	357356	504616	467047	421960	419648	491597	456303	375155	414953	310172	359566	416110	307483	372387	439495	419961	379158	472098	399091	394574	420780	430332	463417		Aminoadipic acid	1		0.15995		1.36395	5.96059e-05	0.210157		1.14258	0.0480918	0.196427		1.28909	0.0480918	0.176399
Indole-3-carboxylic acid	334127	318516	300223	257570	298483	302164	298909	280562	473508	358853	485841	322237	418061	366863	442670	359366	403514	382946	315107	339520	390087	326802	8731.66	407829	368725	465110	436418	456509	367466	379752	410273	411565		Indole-3-carboxylic acid	1		0.108554		1.35006	0.000414867	0.226361		1.07696	0.63336	0.447458		1.37868	0.63336	0.166353
phenylpyruvate	4038.24	4980.66	5509.56	3889.07	7884.57		6747.17		6141.78			12680.5	12777	8809.65		2454.86			2401.18	12703.8	2766.25	3415.43		11806.5	17086.9	5219.4	6126.15	8744.27	24674	6983.77	8873.36	11079.6		phenylpyruvate	1		0.401755		1.55636	0.144341	0.915272		1.20159	0.626262	0.998399		2.01489	0.626262	1.33136
Atrolactic acid	4853.09	4902.35	86649.7	81451.7	82272.6	73537.9	106935	72442.3	3747.73	2387.28	84595.1	2107.76	95160.7	74386.1	135650	79286.5	7194.54	17703.2	17437	5901.03	55877.7	16472.6	4082.15	86578.3	50009.9	61067.7	2737.47	68727.2	1659.97	2245.6	82390.8	8227.39		Atrolactic acid	1		0.839631		0.930369	0.844925	0.964133		0.41175	0.043489	0.518927		0.540042	0.043489	0.623415
Phenyllactic acid	40576.1	44546	67040.1	83110.7	48065.3	47106.7	46295.2	76294.7	40490.9	67291	47160.6	103815	67699.2	81543.8	120028	76709.4	7472.22	25337	2929.99	17130.2	10642.6		10914.4	205715	62548.9	13347.5		18912.5	18604.6	75290.7	80428.1	116878		Phenyllactic acid	1		0.408272		1.33486	0.108474	0.60854		0.706703	0.54241	1.31238		0.973775	0.54241	0.750111
quinolinate	84131.3		11201.9		8374.16	9038.1		4659.49		9609.52	15988.3	76004.9	3402.66		10031.2	13176.4	3944.08	2298.66	7263.35	9669.79	5437.85	3967.95			16896.6	5214.6	18490.1	8523.97			2830.28	8754.17		quinolinate	1		2.04693		0.910048	0.911029	1.75116		0.231263	0.222437	0.353436		0.430914	0.222437	0.678738
phosphoenolpyruvate	542626	366779	315902	198756	263807	194209	185045	337037	369570	333933	177837	288073	224423	127488	266753	262304	124597	109860	208497	122236	108275	81250.3	68572.4	159911	289405	251240	115971	139447	81782.6	162154	100532	161220		phosphoenolpyruvate	1		0.565032		0.852847	0.398978	0.430527		0.408957	0.00152512	0.22018		0.541457	0.00152512	0.32462
Uric acid	933470	1.1079e+06	1.27501e+06	1.36323e+06	1.32345e+06	1.3587e+06	1.44425e+06	1.53477e+06	1.24709e+06	1.20741e+06	960885	1.1263e+06	1.47997e+06	1.11742e+06	1.40093e+06	1.32602e+06	1.4445e+06	1.54343e+06	1.35593e+06	1.46628e+06	1.39765e+06	1.63843e+06	1.45443e+06	1.4636e+06	1.38338e+06	1.52707e+06	1.5271e+06	1.41682e+06	1.73199e+06	1.80659e+06	1.74643e+06	1.80118e+06		Uric acid	1		0.208963		0.954087	0.519989	0.191729		1.13765	0.0309843	0.181065		1.25141	0.0309843	0.228478
dihydroxy-acetone-phosphate	3.467e+06	3.97839e+06	4.13303e+06	4.41044e+06	5.38902e+06	4.81264e+06	4.39188e+06	4.16918e+06	4.71601e+06	3.15217e+06	4.27022e+06	4.34661e+06	4.85924e+06	4.56029e+06	4.99488e+06	4.36354e+06	2.27578e+06	2.74348e+06	3.26292e+06	3.51316e+06	3.08777e+06	2.6352e+06	2.64646e+06	3.45146e+06	2.52516e+06	4.21311e+06	3.4575e+06	3.88639e+06	3.44037e+06	4.00106e+06	3.43163e+06	4.26178e+06		dihydroxy-acetone-phosphate	1		0.186463		1.01472	0.826067	0.187268		0.679573	8.75774e-05	0.135757		0.840739	8.75774e-05	0.171555
D-glyceraldehdye-3-phosphate	3.0972e+06	3.28146e+06	3.99114e+06	4.40662e+06	4.57844e+06	4.36882e+06	4.19358e+06	3.88012e+06	4.19922e+06	2.68359e+06	3.90808e+06	3.71069e+06	3.85554e+06	3.47805e+06	4.03901e+06	3.64099e+06	1.98924e+06	2.81313e+06	2.99213e+06	2.91141e+06	2.53809e+06	2.30753e+06	2.75582e+06	3.3098e+06	2.84264e+06	4.06649e+06	3.25026e+06	3.52461e+06	3.12015e+06	3.74817e+06	3.39891e+06	4.10485e+06		D-glyceraldehdye-3-phosphate	1		0.190855		0.928226	0.274981	0.171486		0.679841	0.00011034	0.138916		0.882339	0.00011034	0.163758
sn-glycerol-3-phosphate	1.64523e+06	1.59544e+06	1.48312e+06	1.37351e+06	1.64672e+06	1.74203e+06	1.4542e+06	1.31838e+06	2.18913e+06	1.58032e+06	1.90559e+06	1.59675e+06	2.27877e+06	1.83088e+06	1.76834e+06	1.78358e+06	1.84491e+06	2.01869e+06	1.64633e+06	1.9231e+06	2.56411e+06	1.93464e+06	2.04001e+06	2.11318e+06	3.365e+06	3.76223e+06	3.58093e+06	4.41577e+06	3.46344e+06	3.69966e+06	3.43191e+06	4.61855e+06		sn-glycerol-3-phosphate	1		0.136586		1.21819	0.00609167	0.202734		1.31213	0.000541424	0.214376		2.47478	0.000541424	0.388847
shikimate	7.11854e+06	6.90842e+06	6.48596e+06	7.04659e+06	6.67417e+06	6.34022e+06	6.0498e+06	6.60466e+06	1.20976e+07	7.15491e+06	6.24579e+06	6.57939e+06	8.41669e+06	7.11777e+06	8.16879e+06	7.83761e+06	1.28198e+07	1.17542e+07	8.32704e+06	1.18997e+07	1.37327e+07	1.34445e+07	1.29169e+07	1.10777e+07	1.48256e+07	1.4853e+07	1.33641e+07	1.45768e+07	1.36423e+07	1.34261e+07	1.27184e+07	1.60219e+07		shikimate	1		0.0774424		1.1952	0.0698479	0.283553		1.80303	6.38939e-07	0.278493		2.13097	6.38939e-07	0.199219
aconitate	201163	183412	235170	305183	264195	349743	282458	242020	120537	218684	207802	83087.9	361210	331203	252250	336747	247083	378661	336797	339956	517748	387222	359030	379186	236609	335451	275182	329897	355485	308577	363570	356192		aconitate	1		0.299251		0.926419	0.649893	0.441557		1.42763	0.00467122	0.419609		1.24117	0.00467122	0.314359
allantoate	161393	153211	179665	178515	202714	233356	189480	228850	166777	119024	94305.3	119289	151571	145887	141783	138155	266018	219645	257943	256783	218900	232946	239572	284674	142582	222050	187176	225674	227863	237541	238407	268815		allantoate	1		0.216075		0.705082	0.000724369	0.160559		1.2942	0.000795589	0.232263		1.14597	0.000795589	0.265685
Ascorbic acid	31938.2	88136.4	89610.9	83756.9	94103.7	104185	65154	51579.8	70005.1	55298.6	52280.6	30265.8	83889.9	65513	55251.5	48392.6	48060.1	116540	104924	66650.2	165979	132922	88071.8	76291	37584.8	119058	104196	83434.2	129455	106413	102601	53539.2		Ascorbic acid	1		0.45384		0.757475	0.0951514	0.320959		1.31386	0.159018	0.656416		1.21006	0.159018	0.571458
2-Isopropylmalic acid	317170	335141	434795	390132	386637	370398	360978	302951	238103	216239	309795	262089	297488	255185	338991	289862	405610	409030	340229	374500	386704	325577	361649	440119	294782	349179	272155	247351	294538	284729	320895	392269		2-Isopropylmalic acid	1		0.16814		0.761766	0.00100874	0.14356		1.0501	0.386105	0.162927		0.847386	0.386105	0.162101
N-carbamoyl-L-aspartate-nega	124773	165858	179250	219810	218139	191229	221058	249256	152508	100587	115691	103736	181143	122100	188743	141106	240813	246929	252713	213088	205448	253655	269617	277178	152231	168449	208437	169496	257294	198422	239113	258671		N-carbamoyl-L-aspartate-nega	1		0.283247		0.704494	0.00688307	0.222561		1.24855	0.0103213	0.280699		1.05272	0.0103213	0.299553
Pyrophosphate	9.29846e+06	1.06909e+07	1.13693e+07	7.93823e+06	9.5534e+06	1.34659e+07	1.30212e+07	1.14042e+07	6.29125e+06	4.27707e+06	8.30382e+06	6.38245e+06	4.683e+06	7.43031e+06	5.63713e+06	5.72952e+06	1.53655e+07	1.49543e+07	1.25376e+07	1.61467e+07	2.6295e+07	1.98772e+07	1.8247e+07	1.8488e+07	1.87444e+07	1.66017e+07	1.73727e+07	2.4501e+07	1.27208e+07	1.70081e+07	1.49761e+07	1.54964e+07		Pyrophosphate	1		0.245135		0.561836	4.34644e-05	0.156787		1.63602	0.000782538	0.47765		1.58426	0.000782538	0.421319
glucono-?-lactone	23331.4	11543.9	24075.4	6391.75	24472.5	13458.6	20999.6	25415.6	16167	24062	21175.3	18382	2587.25	18162.5	16891.9	4623.79	10212.8	17279.2	7121.34	10221.6	3956.69	8568.71	18067.3	31151	8896.96	23933	21175.2	25778.6	21029.7	27091.5	4378.36	24245.3		glucono-?-lactone	1		0.545197		0.815371	0.367937	0.515002		0.712002	0.1975	0.537764		1.04569	0.1975	0.600486
myo-inositol	8.19135e+07	7.40841e+07	7.48785e+07	7.59182e+07	8.14318e+07	8.41932e+07	7.38439e+07	7.16247e+07	5.66207e+07	6.40743e+07	6.43507e+07	6.28922e+07	7.13379e+07	6.00967e+07	7.46599e+07	7.17647e+07	8.11147e+07	6.55406e+07	8.219e+07	7.8044e+07	7.99107e+07	7.93113e+07	7.99268e+07	8.39379e+07	7.59623e+07	7.84607e+07	7.29864e+07	7.14316e+07	7.15105e+07	7.26374e+07	6.8949e+07	7.97151e+07		myo-inositol	1		0.0842241		0.850959	0.000911961	0.0956789		1.01956	0.566251	0.094933		0.957541	0.566251	0.0747598
hydroxyphenylpyruvate						3141.43			8009.8			8176.51				2377.07		7025		4147.05	3829.29			3444.52	6455.22			16416.6			10403.2	6347.39		hydroxyphenylpyruvate	1		#DIV/0!		1.96973	#DIV/0!	#DIV/0!		1.46795	#DIV/0!	#DIV/0!		3.15321	#DIV/0!	#DIV/0!
homocysteic acid	87460.1	2767.03	59122.2	33156.1	39783.7	86445.7	43084.3	2898.28	41857.6	13667.4	77642	67478.2	56851.8	68314.9	65785.7	60122.6	37198.1	44911.5	47642.4	54690	44416.4	43218.7	64371.5	34368.2	41713.8	7906.44	44640.3	54448.5	53460.7	63732.3	48926.1	37153.9		homocysteic acid	1		1.0401		1.27346	0.386387	1.04148		1.04539	0.869366	0.798462		0.992288	0.869366	0.821924
4-Pyridoxic acid	65874.5	74771.1	26243.8	63178.2	59927.9	56576.7	53244.2	41287.5	68554.7	75599.1	103407	31576.1	108403	84805.2	100984	75299	32318.9	71412	54149.7	53506.9	19185.6	90327.5	46053.9	41993.6	53438.3	86951.2	67386.1	67381.8	79857.4	27133.2	79909.6	78536.5		4-Pyridoxic acid	1		0.390269		1.47046	0.0246298	0.606586		0.927101	0.679027	0.476852		1.22555	0.679027	0.488011
3-phosphoglycerate	2.1829e+06	1.59194e+06	1.69376e+06	1.38108e+06	1.61083e+06	2.29775e+06	1.88666e+06	1.67636e+06	2.31997e+06	1.85546e+06	1.73027e+06	1.45351e+06	1.90677e+06	1.42241e+06	1.6592e+06	1.48318e+06	907108	757486	1.48855e+06	1.00721e+06	855110	847262	915462	1.14739e+06	1.39247e+06	1.19762e+06	1.14514e+06	1.23262e+06	1.18837e+06	1.36451e+06	1.017e+06	1.05458e+06		3-phosphoglycerate	1		0.246629		0.965749	0.695027	0.237781		0.553413	4.53683e-05	0.161849		0.669794	4.53683e-05	0.138292
Indoleacrylic acid	5255.31	7493.88	180255	155365	148699	7703.69	154963	5732.17	13618.3	7595.06	12611.4	8640.74	11341.4	153730	170914	12296.3	86731.3	86830.9	4569.02	106059	7597.63	5455.56	87304.7	172819	8645.54	19806.3	6869.07	105446	15336.5	117981	120805	142451		Indoleacrylic acid	1		1.40159		0.587178	0.384935	1.02531		0.837559	0.713169	1.09851		0.807465	0.713169	1.07141
Kynurenic acid	475276	474056	527639	350324	434632	437848	416102	386201	429509	333572	472603	298760	367859	354629	435986	369401	227247	235429	330714	224221	278268	213328	335411	329423	289180	310234	334976	296313	255148	262665	266696	357998		Kynurenic acid	1		0.179395		0.87443	0.0738807	0.173246		0.620786	2.73633e-05	0.144961		0.677658	2.73633e-05	0.119512
citrate-isocitrate	2.09224e+07	2.18938e+07	2.5563e+07	2.65459e+07	2.35459e+07	2.69888e+07	2.74839e+07	2.69227e+07	3.18985e+07	2.75871e+07	2.44616e+07	2.66364e+07	3.35064e+07	2.62099e+07	3.49915e+07	3.50183e+07	2.35062e+07	2.45614e+07	2.75483e+07	1.08168e+07	3.0488e+07	2.94972e+07	2.73888e+07	3.17717e+07	2.29061e+07	2.73447e+07	2.57828e+07	3.204e+07	2.93492e+07	2.92941e+07	2.92191e+07	3.2279e+07		citrate-isocitrate	1		0.14339		1.20235	0.0122164	0.210226		1.02858	0.780286	0.285294		1.14184	0.780286	0.170658
isocitrate	53387.5	71547.2	96706.1	97024.6	107292	88593.1	86347.2	91223.9	88990.7	46282.7	74829	50614.2	84686.2	74905.5	107364	88141	89375	127352	108759	123734	140595	143962	77263.9	118221	48702.7	106993	110809	92643.9	125655	97077.8	115025	143998		isocitrate	1		0.27589		0.889747	0.324773	0.292295		1.34263	0.0115575	0.37674		1.21497	0.0115575	0.400734
citrate	8.48032e+06	8.08742e+06	1.07156e+07	1.09252e+07	9.89496e+06	1.00817e+07	1.10325e+07	1.15553e+07	1.21784e+07	1.34404e+07	9.85487e+06	9.0003e+06	1.28593e+07	1.12298e+07	1.30275e+07	1.23513e+07	9.81444e+06	1.06467e+07	9.43098e+06	9.40759e+06	1.18746e+07	1.18422e+07	9.31656e+06	1.23235e+07	9.60199e+06	1.15663e+07	1.08698e+07	9.45608e+06	1.11763e+07	1.06958e+07	1.15343e+07	1.2699e+07		citrate	1		0.173687		1.16303	0.0366893	0.212578		1.04808	0.451061	0.179584		1.08452	0.451061	0.169952
2-dehydro-D-gluconate	76401.9	97360.2	83622.6	95916.4	74899.8	91549.2	84782.3	96521.8	65492.7	47355	43750.1	38650.5	82463.5	52338.2	77660.9	79010.1	93995.4	97098.8	83015	90377	115888	105658	82392.1	87704.1	85320.2	96972.6	95512.8	99296.1	98019.2	78344.9	93836.1	146506		2-dehydro-D-gluconate	1		0.145635		0.69427	0.00176533	0.211986		1.07856	0.204826	0.17219		1.13231	0.204826	0.260401
D-gluconate	666635	882317	788458	921958	930707	860028	877809	838821	908674	828947	796488	865175	945626	717890	983098	919980	748456	787968	845626	734427	620669	660804	726431	936357	679788	838974	762510	788200	883603	898778	807502	1.08134e+06		D-gluconate	1		0.142722		1.02943	0.572238	0.146034		0.895667	0.0788157	0.149046		0.996152	0.0788157	0.172819
D-erythrose-4-phosphate	209644	168603	269805	196451	252478	247678	223935	237822	271690	190190	278991	237772	207546	186392	275388	210569	152067	197813	255040	214973	213472	218528	163380	299014	188875	179082	219682	242274	191920	226143	204720	261912		D-erythrose-4-phosphate	1		0.2073		1.02885	0.723576	0.228909		0.948999	0.580988	0.251078		0.949177	0.580988	0.187945
Xanthurenic acid	770609	750504	395148	304585	4522.41	473079	228782	170812	24265.7	370177	679067	533532	462662	556706	343627	457868	9872.57	210601	241496	5519.34	240455	5731.4	209920	190547	212619	13508.1	155403	205927	9676.34	220271	144234	189180		Xanthurenic acid	1		0.987283		1.10647	0.731663	0.922139		0.359628	0.0308197	0.380557		0.371466	0.0308197	0.341184
lipoate	8165.92	2759.43	10518	10916.9	7449.15	18259.5	4753.59	7597.62	20249.8		3525.93	10950.9	21731.2	13776.4	12702.5	10665.2	7231.9		6882.12		5293.15	2990.15		8771.05	4431.07	4615.16	4597.55			3014.87	6224.72	3972.06		lipoate	1		0.752214		1.51908	0.127083	1.06916		0.70817	0.279624	0.451691		0.50848	0.279624	0.295467
D-glucarate	55984.1	19338.5	49036.1	44580.9	48980.5	54405.6	56762.6	34564.1	32421.1	18493.2	33872.4	41169.8	45695.7	33054.3	37931.4	39255.5	43388.9	57597.2	55554.4	47390.5	43824	47352.1	47696.5	50807.6	31011	50018.3	30062.3	44273.8	42945	34209.8	58240.2	49661.9		D-glucarate	1		0.397992		0.775173	0.0772598	0.282123		1.08238	0.455106	0.324934		0.93612	0.455106	0.344658
deoxyribose-phosphate	369990	776434	627526	382701	593431	782191	536748	477668	750786	405944	763983	608880	461040	597042	286279	263178	654931	668773	636293	762829	1.12311e+06	743316	801951	433835	584381	913445	846941	941612	631069	773394	519140	537431		deoxyribose-phosphate	1		0.394778		0.909922	0.57266	0.425576		1.28116	0.0940044	0.495896		1.26409	0.0940044	0.464096
pantothenate	1.49003e+06	1.23003e+06	1.89307e+06	3.9838e+06	1.42372e+06	1.52995e+06	1.63319e+06	2.75635e+06	1.44591e+06	2.40052e+06	1.26566e+06	1.53879e+06	2.19834e+06	1.53453e+06	1.82762e+06	1.9968e+06	1.17537e+06	1.07126e+06	1.59955e+06	1.08552e+06	1.04963e+06	1.4994e+06	942866	2.25563e+06	1.20249e+06	1.2596e+06	1.72391e+06	1.30744e+06	1.7229e+06	1.63686e+06	1.25302e+06	1.50371e+06		pantothenate	1		0.660337		0.891346	0.55464	0.46145		0.669958	0.0918859	0.38206		0.728345	0.0918859	0.357818
prephenate	4663.62	5531.39		5068.29			1980.8	1899.91		3698.21				2758.71	3683.51																			prephenate	1		0.646854		0.88282	0.689217	0.427567		#DIV/0!	#DIV/0!	#DIV/0!		#DIV/0!	#DIV/0!	#DIV/0!
deoxyuridine		11615.1	6018.77			5899.47	3599.02			3698.69	7984.61			7654.96	12113.5	10665.5		3317.04	7424.25		4118.15	10464		5683.72		5218.05	4088.19	6493.86	4609.62	5153.64	2245.56	9435.52		deoxyuridine	1		0.710623		1.24183	0.483829	0.785003		0.914247	0.78805	0.623007		0.784396	0.78805	0.513225
ribose-phosphate	1.74934e+06	1.44e+06	1.72102e+06	1.36727e+06	1.61134e+06	1.61558e+06	1.58862e+06	1.59786e+06	2.06583e+06	1.41516e+06	1.83624e+06	1.3923e+06	1.53643e+06	1.50186e+06	1.68999e+06	1.64313e+06	1.24227e+06	1.13156e+06	1.33997e+06	1.22639e+06	978945	996905	1.13753e+06	1.36159e+06	1.63063e+06	1.70193e+06	1.32829e+06	1.38965e+06	1.12531e+06	1.33423e+06	1.16065e+06	1.32199e+06		ribose-phosphate	1		0.114628		1.03072	0.606668	0.16624		0.741877	3.09834e-05	0.10822		0.866179	3.09834e-05	0.145749
thymidine						2711.88	5151.29		5405.02		7759.85			6617.81				4324.63		2932.05	10648.6			8771.53					3216.95		3978.31			thymidine	1		0.620464		1.67725	0.125719	0.794488		1.69631	0.388044	1.1876		0.91506	0.388044	0.424179
uridine	15337.9	12701.8	20685.2	11148.4	11829.7	15090.6	13075.1	9688.02	6075.44	20134.1	9114.94	12074.2	9928.09	20809.3	24160	23212.6	41931.7	17689.4	8426.48	17109	25240.9	22848.3	17368.8	13660.1	29477.3	22077.1	41674.8	13530.8	11503.8	32286.5	28055.5	11421.4		uridine	1		0.351069		1.1456	0.487145	0.593491		1.49945	0.0900273	0.823813		1.73451	0.0900273	0.914583
deoxyinosine	34454.7	18733	36145.4	24729	40960.1	52602.2	45864.5	35708.2	29675.9	30527.7	31744.2	19791.9	33604.4	34766	57432.7	18946.3	13415.2	7080.28	41162.2	17021	8750.16	10382.4	15296.9	31196.9	8014.77		7105.98	5382.14	16654.9			13908.4		deoxyinosine	1		0.424718		0.886901	0.483779	0.422521		0.498985	0.0068126	0.363422		0.282527	0.0068126	0.158072
shikimate-3-phosphate																																		shikimate-3-phosphate	#DIV/0!		#DIV/0!		#DIV/0!	#DIV/0!	#DIV/0!		#DIV/0!	#DIV/0!	#DIV/0!		#DIV/0!	#DIV/0!	#DIV/0!
D-glucono-?-lactone-6-phosphate	38422.3	62446	49215.5	32561.2	36350	53085	32810.7	53447.5	29701.4	14773.8	18441.5	62259.9	15997.6	20588.6	32584.7	27959.2	36168.7	62114.3	48992.6	54522.2	76037.4	52321.8	48193.8	59658.3	21098.6	52056.7	33721.9	45349.5	23874.7	17966.3	34776.3	36150.4		D-glucono-?-lactone-6-phosphate	1		0.353982		0.620382	0.0243325	0.377483		1.22234	0.104149	0.402342		0.739509	0.104149	0.322562
hexose-phosphate	8.11288e+06	8.25158e+06	8.20353e+06	5.70012e+06	7.38457e+06	7.18819e+06	6.38552e+06	5.36239e+06	9.08755e+06	4.29797e+06	9.89871e+06	7.57007e+06	6.88977e+06	8.42452e+06	7.3277e+06	4.67541e+06	5.05258e+06	5.17342e+06	5.92383e+06	6.07711e+06	5.99764e+06	4.71171e+06	4.93559e+06	6.45156e+06	6.12896e+06	6.32795e+06	6.29138e+06	6.32513e+06	4.81553e+06	5.81978e+06	5.13634e+06	5.65523e+06		hexose-phosphate	1		0.228485		1.02797	0.809924	0.325067		0.783255	0.00519731	0.155859		0.821723	0.00519731	0.155848
glucose-1-phosphate	1.45697e+06	1.4698e+06	1.3732e+06	961780	1.00895e+06	1.0568e+06	826111	418491	1.40391e+06	1.22328e+06	1.53042e+06	1.23269e+06	1.01782e+06	1.32525e+06	1.02959e+06	1.08746e+06	749311	778226	783424	807716	869511	683496	803583	819908	931910	981556	803589	817265	683959	821071	797449	751482		glucose-1-phosphate	1		0.473527		1.14912	0.280815	0.421069		0.73438	0.0435797	0.251108		0.768573	0.0435797	0.272038
glucose-6-phosphate	403553	338495	281270	282937	282893	340135	404475	318453	362326	317403	433729	265369	388847	383644	437466	361178	216815	160019	236478	251859	214265	208541	158311	273755	325351	310163	290114	296415	256383	306265	292043	351589		glucose-6-phosphate	1		0.216643		1.11227	0.190821	0.242728		0.648532	0.000171706	0.157759		0.915585	0.000171706	0.163464
fructose-6-phosphate	307373	303968	387510	241687	369711	337662	332693	248583	529188	402773	400151	318865	398585	440895	409452	319841	181012	187871	362694	289343	287767	223320	229663	292164	224741	277836	268441	279168	206496	281234	267657	321350		fructose-6-phosphate	1		0.233254		1.27304	0.0122115	0.298322		0.812053	0.0567756	0.237262		0.840952	0.0567756	0.178614
1,3-diphopshateglycerate	259365	150722	119254	77678.9	118368	92970.5	74970.9	92633.4	90250	137220	81695.5	70239.1	44535.1	75162.1	34916.4	84649.7	38991.5	200740	102630	106426	100020	68665.9	79945.8	52550.7	96822.2	131529	63401.9	107582	54495.8	54147.6	89112.5			1,3-diphopshateglycerate	1		0.693707		0.627477	0.0767651	0.397839		0.760649	0.304147	0.548974		0.692107	0.304147	0.414842
2,3-Diphosphoglyceric acid	249381	75469.6	44200.9	41388.9	64095.8	53368.1	64349.6	98529.9	100477	144290	42477.4	73084.8	37539.6	14874.1	38213.2	50000.9	424027	84544.8	111607	126321	138497	120695	471608	529099	205159	115947	103390	97796.6	97314.7	95905.2	74416	510435		2,3-Diphosphoglyceric acid	1		1.11959		0.725202	0.416588	0.751627		2.90452	0.0358455	3.16925		1.88245	0.0358455	2.25367
S-ribosyl-L-homocysteine-nega	40817.5	32084.8	17522.7	17545.4	23218	16402.4	10321.8	22804.9	7426.12	30119.2	41633.5	18378	17829.3	30758.5	27369.4	20845.2	19108.7	17800	14325.8	8789.18	14673.3	8012.71	7719.49	8318.81	25476	16863.3	21963.6	12958.5	7833.96	16597.4	10633.5	9420.31		S-ribosyl-L-homocysteine-nega	1		0.609161		1.07549	0.74007	0.653532		0.546422	0.0178351	0.313804		0.673684	0.0178351	0.399601
inosine	1.8862e+06	1.20806e+06	1.15299e+06	832077	989188	845408	930740	1.09076e+06	1.03523e+06	1.08102e+06	808122	795673	805524	699466	1.04168e+06	766831	108646	338339	423295	270057	112261	102564	152245	787709	408737	434788	367903	174132	352745	367098	420298	479213		inosine	1		0.430155		0.787152	0.0911537	0.273758		0.256856	5.65321e-05	0.224475		0.336292	5.65321e-05	0.131037
6-phospho-D-gluconate	213853	209781	236307	204467	396668	280455	242089	196342	227728	142961	122790	164242	166582	154140	131561	159319	144952	114287	234232	165225	172003	210342	184769	199308	105236	143157	121304	139462	109238	124960	114723	83939.9		6-phospho-D-gluconate	1		0.377275		0.641085	0.00410324	0.214315		0.71977	0.0219524	0.245618		0.475777	0.0219524	0.148617
xanthosine	217798	316094	307993	310643	301589	266268	358798	287250	289300	219836	273522	229120	334482	250752	337464	319223	291153	286494	286726	284978	261385	275950	300972	336757	300928	301067	299710	264783	350850	342948	346805	352850		xanthosine	1		0.196397		0.952361	0.529816	0.204806		0.982244	0.754443	0.155271		1.08177	0.754443	0.186404
D-sedoheptulose-1-7-phosphate	989120	1.16165e+06	1.39143e+06	1.10909e+06	1.39711e+06	1.30438e+06	1.39295e+06	1.36246e+06	1.29933e+06	1.20647e+06	1.54259e+06	1.11097e+06	1.4427e+06	1.40756e+06	1.42105e+06	1.40045e+06	701437	762888	941826	918664	949043	786152	781282	1.10804e+06	851045	1.04814e+06	955412	1.05525e+06	953519	1.07795e+06	1.03727e+06	1.0675e+06		D-sedoheptulose-1-7-phosphate	1		0.175415		1.07152	0.243675	0.172926		0.687497	9.02097e-05	0.135927		0.795998	9.02097e-05	0.116779
N-acetyl-glucosamine-1-phosphate	973988	941296	884728	753653	817208	882275	802612	901517	803497	1.51139e+06	947629	914264	893546	820480	951270	862911	940791	856198	761834	772174	698325	728449	897820	928839	891426	865365	904268	764195	723909	800681	769593	843868		N-acetyl-glucosamine-1-phosphate	1		0.120005		1.10747	0.28869	0.278569		0.946409	0.290298	0.13517		0.943372	0.290298	0.109964
glutathione-nega	2.01553e+07	1.57943e+07	1.42226e+07	9.82296e+06	1.21932e+07	1.32304e+07	1.00048e+07	8.75075e+06	5.45916e+07	5.14193e+07	7.63025e+07	6.22502e+07	5.5535e+07	6.38309e+07	5.56264e+07	5.91242e+07	1.35806e+07	1.17915e+07	8.07467e+06	1.20604e+07	1.0362e+07	7.91126e+06	7.84006e+06	7.01275e+06	3.249e+07	4.44237e+07	4.06076e+07	4.42148e+07	3.21312e+07	3.55666e+07	3.10438e+07	3.99421e+07		glutathione-nega	1		0.407025		4.595	4.01877e-10	1.45243		0.754825	0.0631679	0.287121		2.88382	0.0631679	0.92957
dUMP-nega	45008.3	46455.6	20390.6	36619.8	58687.7	38729.2	45608.4	42928.4	22276.9	54241.1	28227.2	37465.8	41772.2	48468.7	47358.7	42662.3	38748.8	39387.8	26964.1	37420.2	45893.2	34388	28344.8	78385	44701.6	40125.5	51487.3	47511.7	63074.3	53815.2	60464	77515.9		dUMP-nega	1		0.367836		0.964252	0.785506	0.357878		0.98536	0.93063	0.4651		1.31178	0.93063	0.445054
Geranyl-PP	251398	538622	517723	384034	437428	917980	208619	191670	858962	700165	788964	718680	439972	464821	440550	446734	382265	347045	448140	389815	376644	243425	441552	365006	688772	244553	407432	521964	122718	329734	281553	341881		Geranyl-PP	1		0.78202		1.40939	0.114907	0.880941		0.86843	0.526047	0.502329		0.852394	0.526047	0.621417
O8P-O1P	411453	988537	484120	586904	707392	741239	505852	717920	597022	403224	825476	435736	394569	519370	470012	488104	827938	511097	764285	1.10827e+06	1.35374e+06	650614	1.03269e+06	407343	411086	514964	539704	1.01546e+06	513261	533563	461209	547235		O8P-O1P	1		0.406972		0.803651	0.147078	0.318708		1.29408	0.168488	0.619624		0.881998	0.168488	0.385891
dTMP-nega	50827.9	88415.7	131441	63730.4	117972	147626	139646	77152.6	77511.4	79324.5	91693.9	61917.8	90767.1	62234.1	57582.8	86414.4	27398.9	12569.9	79404.2	59005.2	23443.9	14614.9	20989.8	83793	7418.5	8985.36	18702.4	15160.1	13596.6	11537.8	9161.96	14503.6		dTMP-nega	1		0.510423		0.743679	0.0806666	0.300065		0.39326	0.00228424	0.320434		0.121284	0.00228424	0.0574357
cyclic-AMP	17238	42856.1	31864	23035.2	15096.8		20316.5	10373.4				10006.5	46314.4	81661.3	23699		18375.7	47132.4			23480.1	10142		50629			13459.6		7992.78		14093.4	10277.1		cyclic-AMP	1		0.68153		1.75981	0.201543	1.60529		1.30404	0.421688	1.00336		0.498757	0.421688	0.270482
fructose-1,6-bisphosphate	3.39093e+07	2.70156e+07	2.68799e+07	2.56361e+07	2.57423e+07	2.82742e+07	5.241e+07	4.33012e+07	3.68972e+07	3.53966e+07	3.34434e+07	2.72948e+07	3.14151e+07	2.81604e+07	2.60183e+07	2.47073e+07	2.01677e+07	1.4881e+07	2.50966e+07	2.2667e+07	2.29522e+07	1.88579e+07	1.78179e+07	2.43695e+07	3.40879e+07	2.67358e+07	3.21062e+07	2.65948e+07	2.03517e+07	2.53285e+07	2.21129e+07	2.38433e+07		fructose-1,6-bisphosphate	1		0.425616		0.924628	0.529925	0.3105		0.633851	0.00591903	0.218923		0.80238	0.00591903	0.280542
trehalose-sucrose	220562	231066	231660	250857	274013	327141	304682	333458	223584	167744	219537	213163	310611	205585	302322	203452	385616	539617	359737	347099	358531	419055	445100	399614	427919	344659	431087	395575	468667	410310	389509	609832		trehalose-sucrose	1		0.23515		0.849344	0.106986	0.231292		1.49734	0.000223675	0.340474		1.60003	0.000223675	0.395284
Cellobiose	126672	148764	95497.5	99457.3	110364	110757	94865.2	88141.5	72873.5	107885	77428.8	101448	107958	126488	131345	121196	39376.7	15132.5	12175.2	14476.9	32482	34883.8	26088.3	60379.4	132389	62077	35091.9	46111.4	64045.7	63326.8	18795.9	22855.1		Cellobiose	1		0.259012		0.968101	0.74204	0.264777		0.268713	4.5408e-07	0.155988		0.5085	4.5408e-07	0.341102
orotidine-5-phosphate	4672.85	6636.52	9805.72	7358.94	6131.92	6344.42	16174.9	4931.92	6075.88	8618.74	11450.1	9221.54		13188	6148.52	10501.7	3027.9	9160.38	3220.65	8224.59	9983.48	2978.41	10183.2	2635.58	9414.53	9317.52	13475.6	15491.2	11212.7	10516	7996.63	8963.3		orotidine-5-phosphate	1		0.684236		1.20082	0.3767	0.673663		0.796268	0.39757	0.591918		1.39206	0.39757	0.748269
SBP	678017	636279	718012	710531	579499	646154	1.14933e+06	903760	1.98445e+06	1.33536e+06	1.14201e+06	926824	1.00613e+06	956947	1.05556e+06	887772	328206	343518	595873	391078	402472	330681	370723	509620	493777	596060	470661	583689	593971	724828	530375	659201		SBP	1		0.350497		1.54362	0.0129851	0.614078		0.543407	0.000383385	0.185017		0.772648	0.000383385	0.221726
trans, trans-farnesyl diphosphate	10768.4	12143.2	22335	3922.35	12577.1	19591.6	3007.99	16690.2	16625.6	14085.6		14351.8	14387.8	3783.72	19963.9	10608.9	5736.69	5444.88	16861.9	30629.6	26483.2	9401.59	6961.28	8672.49	11259.2	36088.2	17078.8	5617.65	7836.57	27851.6	7122.22	10337.1		trans, trans-farnesyl diphosphate	1		0.770294		1.06109	0.811433	0.705086		1.09062	0.791683	0.981091		1.21928	0.791683	1.09654
S-adenosyl-L-homocysteine-nega	90763	29028.7	51168.5	26499.3	188505	160726	69907.4	34111.9	187506	114317	585977	174987	248236	443304	218833	90403.5	16411.9	12985.9	43726.1	21145.2	73517.8	96621.5	7290.57	120386	16471.2	21693.1	63738.7	60600.3	123778	103306	94596.8	126342		S-adenosyl-L-homocysteine-nega	1		1.07763		3.17125	0.015656	3.20112		0.60255	0.245097	0.699037		0.938247	0.245097	0.887286
dCDP-nega	85515	56483.7	71518.9	53334.8	50323.7	74781.7	35105.9	47775.4	103744	106269	77962.4	72204.9	76934.1	80447.6	57902.9	53827	19632.2	12018.9	27399.6	20047.8	8234.56	10973.2	9271.67	23665.8	16454.3	19298.8	8066.17	15656.9	15206.1	14585.7	17339	20867.1		dCDP-nega	1		0.394443		1.32527	0.0471151	0.487332		0.276396	9.65753e-06	0.143839		0.268458	9.65753e-06	0.0987514
5-phosphoribosyl-1-pyrophosphate	54579.3	43906.3	49743.2	34119.4	46398.7	87448.2	54377.4	55338.8	59338.8	31946.3	12285.4	18646.4	34653.6	24568.4	32466.3	6565	24933.8	77974.8	73886.7	37905.7	119916	99537.5	119352	26260	113073	100978	139105	158787	143014	115214	104905	102164		5-phosphoribosyl-1-pyrophosphate	1		0.412675		0.517643	0.00613501	0.341858		1.36124	0.218765	0.838036		2.29447	0.218765	0.785273
Deoxycholic acid														3304.93	2632.31									3508.43			5109.34				2674.85	4929.36		Deoxycholic acid	#DIV/0!		#DIV/0!		#DIV/0!	#DIV/0!	#DIV/0!		#DIV/0!	#DIV/0!	#DIV/0!		#DIV/0!	#DIV/0!	#DIV/0!
OBP		271693	369265	377058	284672	105505	90907.6	103505	122785	71197.7	93120.9	85719.7	66937.3	74421.3	111540	72242.2	291927	31057.7	81550.7	426480	61872.2	388592		489027	626730	745399	111692		84014.8	83518.9	79401.1	85904.5		OBP	1		0.783738		0.381078	0.00798964	0.229434		1.10477	0.787332	1.03789		1.13357	0.787332	1.42794
dTDP-nega	100242	109191	130131	86948.5	100292	123581	106930	115685	202499	131661	145515	151297	129258	123713	108543	122844	10974.5	5742.88	78093.7	28794.3			8055.1	46635.5	7459.44	16304.6	21772.1	6634.7	8749.46	16038.1	16431.3	16774.5		dTDP-nega	1		0.17976		1.27758	0.0178689	0.309671		0.272311	1.53631e-05	0.262219		0.12619	1.53631e-05	0.0524249
CDP-nega	975348	852792	801167	555293	844802	737563	777824	582621	874469	948569	269705	179523	596151	645786	610594	641111	473896	516614	555128	587477	582691	397618	407824	524105	468096	480617	518225	486047	405822	454364	395858	393370		CDP-nega	1		0.259043		0.777802	0.129295	0.372516		0.660206	0.000376457	0.154358		0.587916	0.000376457	0.123812
UDP-nega	8.58414e+06	7.45986e+06	7.12922e+06	5.47305e+06	6.86584e+06	4.6249e+06	4.9186e+06	7.06565e+06	1.59677e+07	1.29601e+07	1.48237e+07	1.19462e+07	9.72094e+06	8.95833e+06	8.18616e+06	8.29286e+06	3.30652e+06	2.37934e+06	4.71453e+06	3.14398e+06	2.06991e+06	2.1381e+06	2.88387e+06	3.13609e+06	4.99263e+06	4.36187e+06	3.29137e+06	3.95164e+06	2.46802e+06	2.97323e+06	2.51842e+06	3.1938e+06		UDP-nega	1		0.2979		1.74317	0.00103582	0.591989		0.456097	2.29019e-05	0.162184		0.532431	2.29019e-05	0.17737
Cholic acid	5832.06		7477.33				3549.59	2658.96						2755.23			3107.37							3504.15			5107.82	5928.58	10597.3					Cholic acid	1		0.634001		0.564657	#DIV/0!	#DIV/0!		0.677481	0.392939	0.309114		1.47787	0.392939	0.898442
trehalose-6-Phosphate	52318.4	60419.4	49353.3	45740.2	90090.5	62471.3	75471.2	53315	34602.5	7684.94	41330.1	11195	32630.9	30694.6	42397.6	38147.1	45423.1	55068.7	45139.2	86912.2	46187.6	63926.5	66540	52004	71565.6	42551.5	32945.2	48922		34706.3	51085.6	50410.7		trehalose-6-Phosphate	1		0.345367		0.487925	0.000563667	0.24725		0.942806	0.640795	0.329299		0.77608	0.640795	0.283914
Thiamine pyrophosphate	148013	144014	139571	136801	150130	137424	104745	83389.6	182878	132198	185740	192678	192428	112692	166933	209570	153671	128358	18422.9	26812.2	204225	133054	14170	12652.7	170591	51781	125452	166453	95961.8	14655.3	134216	160290		Thiamine pyrophosphate	1		0.256666		1.31705	0.0122852	0.348767		0.662173	0.142582	0.599799		0.880578	0.142582	0.464639
adenosine 5-phosphosulfate	56804.7	83032.7	53637.1	54351.2	55254.5	55533.9	61561	12544.8	148759	102102	114469	117174	88158.1	84332.5	64258.3	63890.6	45042.6	27403.4	34626.3	26391.2	55355.9	8759.67	21858.6	37721.5	40391.3	43268.5	18835.4	31849.7	43304.4	25786.3	21296.1	40743.9		adenosine 5-phosphosulfate	1		0.506845		1.80981	0.00309919	0.839511		0.594285	0.0222105	0.340873		0.613504	0.0222105	0.288707
ADP-nega	1.3654e+07	1.25673e+07	1.0857e+07	8.0426e+06	8.89757e+06	7.5411e+06	1.37969e+07	1.15618e+07	2.8551e+07	1.99729e+07	2.48892e+07	1.86275e+07	1.7866e+07	1.61065e+07	1.41007e+07	1.30793e+07	6.66737e+06	5.55978e+06	7.26348e+06	5.27802e+06	5.01018e+06	4.68067e+06	6.23477e+06	5.82084e+06	6.08851e+06	1.05169e+07	8.04582e+06	8.90457e+06	5.61074e+06	6.36979e+06	5.23183e+06	6.58453e+06		ADP-nega	1		0.321269		1.76249	0.00127275	0.630031		0.535159	8.42021e-05	0.145535		0.659846	8.42021e-05	0.225143
dGDP-nega	1.3654e+07	1.25673e+07	1.0857e+07	8.0426e+06	8.89757e+06	7.5411e+06	1.37969e+07	1.15618e+07	2.8551e+07	1.99729e+07	2.48892e+07	1.86275e+07	1.7866e+07	1.61065e+07	1.41007e+07	1.30793e+07	6.66737e+06	5.55978e+06	7.26348e+06	5.27802e+06	5.01018e+06	4.68067e+06	6.23477e+06	5.82084e+06	6.08851e+06	1.05169e+07	8.04582e+06	8.90457e+06	5.61074e+06	6.36979e+06	5.23183e+06	6.58453e+06		dGDP-nega	1		0.321269		1.76249	0.00127275	0.630031		0.535159	8.42021e-05	0.145535		0.659846	8.42021e-05	0.225143
IDP-nega	2.05364e+06	1.82962e+06	1.52004e+06	1.17123e+06	1.28685e+06	1.02049e+06	1.09178e+06	1.53153e+06	3.79609e+06	2.41804e+06	3.4375e+06	2.53182e+06	2.75356e+06	2.10648e+06	1.83992e+06	1.79461e+06	796305	787942	915011	742969	618367	635585	752308	733774	1.35011e+06	1.36077e+06	923116	1.29139e+06	604712	843319	704841	757309		IDP-nega	1		0.359594		1.79728	0.00131157	0.679518		0.519963	0.000141528	0.147406		0.681047	0.000141528	0.275786
GDP-nega	4490.14	421087	375413	256988	573570	394429	220097	417937	3785.97	392718		2748.31			224444	298273	266202	221881	204860	189188	116536	119765	190745	167157	386878	352891	290529	326062	160357	239851	164977	210051		GDP-nega	1		0.726528		0.553733	0.159585	0.599621		0.554177	0.0336324	0.322184		0.800145	0.0336324	0.48516
CDP-ethanolamine	22165.2	36507.3	52582	25221.9	45948.3	32842.9	47934.1	29632.9	16199.2	15715.8		17867.6	22847.7	20893.2	22108.1	14059.9	15987.1	17307.9	33713.5	19563.4	34713	18935.9	44305.8	48666.1	3886.7	13374.3	19414.9	7472.81	12888.3	8042.56	19121.5	30300.9		CDP-ethanolamine	1		0.431155		0.506152	0.00124859	0.180608		0.796329	0.237501	0.428845		0.391012	0.237501	0.260357
FMN	20986.4	16069.1	3546.73	7396.55	3941.8	7847.92	9908.12	6837.65	12153.1	11091		3457.69		4958.4	3982.95	5817.55	10323.3	7688.9	6740.61	7367.06	4116.36		14364.4	6138.46		10493.1	15778.6	4853.04		5522.74	6648.12			FMN	1		0.893611		0.722303	0.364074	0.601895		0.847264	0.580334	0.638466		0.905123	0.580334	0.74312
cholesteryl sulfate	1.07391e+06	1.47728e+06	512859	541092	257640	201542	353773	474309	1.14741e+06	1.87069e+06	435750	938057	259770	146735	215763	739974	1.68203e+06	1.14143e+06	349009	571679	270506	227859	931103	277094	2.50764e+06	1.60092e+06	407676	707403	197177	335580	237159	341618		cholesteryl sulfate	1		1.01803		1.17614	0.684981	1.28262		1.11412	0.7777	1.17585		1.2949	0.7777	1.64685
dCTP-nega	149375	130055	161273	124210	126868	139185	154276	137403	207773	245271	252426	152253	131632	147844	161273	150903	35145.7	17138.3	140255	88975	15464.9	15460.2	18027.6	83031	49745.4	52263	32403.8	50685.6	29018.3	66394.7	28903.5	65061		dCTP-nega	1		0.135817		1.29104	0.033802	0.358594		0.368325	0.000152704	0.336558		0.333565	0.000152704	0.112872
dUTP-nega	8783.59	10405.4	12037.3	6800.61	11973	18014.8	11113.2	18998.7	21554.2	20695.2	14073.6	9344.72	3357.68	5509.86	14736.7	21266.7		3845.14	21488.7			3711	4578.79	17981.2	12738.4	4106.19	12770.4	6016.84		5513.08	3563.33	5461.97		dUTP-nega	1		0.487814		1.12649	0.607146	0.703354		0.841439	0.595057	0.765546		0.58432	0.595057	0.377191
dTTP-nega	276874	253899	313165	300055	336251	537184	661821	611653	389478	290922	315254	230373	240336	283608	313146	206591	76825.9	13470.4	591552	185721	18755.1	32464.7	92085.1	384077	90332.2	43134.7	82152.8	78283.6	57594.6	68392.8	53071.4	83930.5		dTTP-nega	1		0.565248		0.689692	0.057455	0.309936		0.423881	0.0243339	0.534709		0.169222	0.0243339	0.0790724
CTP-nega	1.08568e+06		832209	859276	922981	1.16878e+06	1.54275e+06	1.33071e+06	1.26166e+06	953084	1.36192e+06	1.0122e+06	670105	855726	701368	688233	955495	686107	1.71722e+06	1.09796e+06	754487	700128	864858	1.08597e+06	1.16993e+06	1.13118e+06	905525	1.10152e+06	540781	651101	553257	764284		CTP-nega	1		0.336241		0.848091	0.239608	0.312315		0.888542	0.449463	0.371233		0.770484	0.449463	0.299019
UTP-nega	1.92225e+07	1.71606e+07	1.72342e+07	1.56373e+07	1.77274e+07	1.93221e+07	2.48161e+07	2.12754e+07	2.60956e+07	1.80775e+07	2.30031e+07	1.99259e+07	1.34872e+07	1.58708e+07	1.41418e+07	1.51712e+07	1.26391e+07	1.03838e+07	2.4647e+07	1.66268e+07	1.18104e+07	1.15968e+07	1.21576e+07	1.74742e+07	1.60332e+07	1.65016e+07	1.25563e+07	1.58658e+07	7.82272e+06	1.02853e+07	8.09494e+06	1.07131e+07		UTP-nega	1		0.214737		0.956543	0.668222	0.277256		0.769939	0.0426063	0.275201		0.642229	0.0426063	0.210726
CDP-choline	31488.2	39273.6	56088.9	28939.9	41607.8	34180.7	26551.4	17475.6	20927.6	24654.5	23287.7	28818.7	21194.6	25478.8	18941	11636.7		5019.39	16012.2	20526.4				22810.9		4656.15	5107.82	7033.21	6450.15	11533.2	5334.75	5968.01		CDP-choline	1		0.473788		0.634745	0.0137405	0.259951		0.467108	0.0177625	0.277716		0.191094	0.0177625	0.0931104
dATP-nega	80621.5	80780.2	96213.3	70614	94327.7	74893.9	108177	173245	149750	162527	168330	125877	66691.1	88248.3	94514.6	91849.2	25822.6	6197.97	153955	61085.1	2923.38	15945.8	17551.4	68403.9	16654.9	18745.2	35189.7	27534.5	9294.19	26672.5	12115.6	30798.8		dATP-nega	1		0.480549		1.21687	0.258531	0.571639		0.451787	0.0255809	0.541761		0.227258	0.0255809	0.122624
Taurodeoxycholic acid	70382.7	120968	123404	27939.4	93390.6		98860	36742.2	78254.3	23393.6	22957.5	39933.5	24851.8	22746.7	45291.1	17678.9	101930	83581.7	72609.2	104621	24720.8		132276	118099	40802.9	35807.5	50173.3	40075.9	26471	172940	162718	35809.4		Taurodeoxycholic acid	1		0.661343		0.421068	0.009113	0.315292		1.11571	0.639865	0.678502		0.864457	0.639865	0.843186
ATP-nega	3.03152e+07	2.77497e+07	2.86273e+07	2.34201e+07	2.65547e+07	3.11407e+07	3.10683e+07	4.38276e+07	4.68987e+07	3.47885e+07	4.08603e+07	3.67019e+07	2.59531e+07	3.05688e+07	3.04936e+07	2.88167e+07	3.16947e+07	2.9588e+07	4.10795e+07	3.78149e+07	3.70448e+07	3.08305e+07	3.25772e+07	3.33683e+07	4.73496e+07	4.96153e+07	3.24143e+07	4.67926e+07	2.049e+07	2.7824e+07	2.20389e+07	2.68723e+07		ATP-nega	1		0.281321		1.1334	0.233201	0.320879		1.12894	0.148077	0.260027		1.12646	0.148077	0.453668
dGTP	3.03152e+07	2.77497e+07	2.86273e+07	2.34201e+07	2.65547e+07	3.11407e+07	3.10683e+07	4.38276e+07	4.68987e+07	3.47885e+07	4.08603e+07	3.67019e+07	2.59531e+07	3.05688e+07	3.04936e+07	2.88167e+07	3.16947e+07	2.9588e+07	4.10795e+07	3.78149e+07	3.70448e+07	3.08305e+07	3.25772e+07	3.33683e+07	4.73496e+07	4.96153e+07	3.24143e+07	4.67926e+07	2.049e+07	2.7824e+07	2.20389e+07	2.68723e+07		dGTP	1		0.281321		1.1334	0.233201	0.320879		1.12894	0.148077	0.260027		1.12646	0.148077	0.453668
GTP-nega				47995.2	31649.9	61549.8	68765.5	54329.2	6740.4						284001		1.69366e+06	1.33139e+06	34463.7	51900.7	53417.7	854934	1.47778e+06	1.12003e+06	40049	29124.2	47387.2	1.34516e+06	40654.3	47103.6	36933.6	1.09634e+06		GTP-nega	1		0.379363		2.75022	0.267236	3.78172		15.6494	0.0314783	13.7314		6.34425	0.0314783	10.5537
UDP-D-glucose	6.48509e+06	6.65857e+06	6.75171e+06	6.61756e+06	6.96287e+06	6.84508e+06	6.55469e+06	5.17398e+06	8.69923e+06	6.32476e+06	7.25164e+06	6.70046e+06	6.93133e+06	6.83616e+06	6.67511e+06	6.30257e+06	4.41127e+06	3.65902e+06	6.5034e+06	4.64474e+06	4.15717e+06	3.66617e+06	3.9144e+06	5.66059e+06	4.22913e+06	4.55997e+06	4.49963e+06	4.72734e+06	4.01044e+06	4.33487e+06	3.86753e+06	4.6608e+06		UDP-D-glucose	1		0.12177		1.07054	0.192992	0.149559		0.703498	0.000336012	0.167285		0.670317	0.000336012	0.0747231
UDP-D-glucuronate	1.20303e+06	1.27664e+06	1.37905e+06	1.23714e+06	1.24489e+06	1.28017e+06	1.23582e+06	1.17768e+06	4.41471e+06	3.58211e+06	3.60384e+06	3.32166e+06	3.24463e+06	3.80551e+06	3.58767e+06	2.92291e+06	1.18157e+06	1.01251e+06	1.16858e+06	1.0856e+06	990386	1.01415e+06	1.03705e+06	1.01956e+06	3.45554e+06	3.43461e+06	3.42456e+06	3.68924e+06	2.38679e+06	3.21201e+06	2.62465e+06	3.20338e+06		UDP-D-glucuronate	1		0.0686561		2.83853	6.7729e-10	0.377001		0.84802	6.32163e-05	0.0720354		2.53436	6.32163e-05	0.377061
ADP-D-glucose	15129.9	3874.76	26023.9	30699.1	14877.7	12654.4	7247.13	6838.65	6791.7	30817.3	45806.1	31790.9	15479.4	19604.9	18419.6	28116.1	12386.9	6731.29	18544.9	29812.8	5293.56	9466.6	20091.7	9646.86	8266.46	7342.93	13792.5	5400.18	5067.69	17603.4	4004.86	5956.88		ADP-D-glucose	1		0.909658		1.67732	0.0876177	1.35593		0.95423	0.881846	0.833351		0.57467	0.881846	0.493021
guanosine 5-diphosphate,3-diphosphate																																		guanosine 5-diphosphate,3-diphosphate	#DIV/0!		#DIV/0!		#DIV/0!	#DIV/0!	#DIV/0!		#DIV/0!	#DIV/0!	#DIV/0!		#DIV/0!	#DIV/0!	#DIV/0!
UDP-N-acetyl-glucosamine	1.7824e+06	1.97854e+06	1.97712e+06	1.75801e+06	2.07593e+06	2.20956e+06	1.92556e+06	1.8403e+06	3.39735e+06	2.59926e+06	3.26533e+06	2.84485e+06	2.62255e+06	2.80135e+06	2.7742e+06	2.44523e+06	1.70246e+06	1.58342e+06	2.04463e+06	1.88794e+06	1.90273e+06	1.43681e+06	1.51243e+06	2.08814e+06	2.21362e+06	2.78643e+06	2.55533e+06	2.65835e+06	1.88475e+06	2.1234e+06	2.02691e+06	2.621e+06		UDP-N-acetyl-glucosamine	1		0.110707		1.46327	6.02613e-06	0.204464		0.910668	0.112031	0.145441		1.21369	0.112031	0.197378
glutathione disulfide-nega	1.27893e+07	1.38594e+07	1.49866e+07	1.35411e+07	1.65886e+07	1.82027e+07	1.6361e+07	1.46269e+07	3.66297e+07	2.6582e+07	3.36089e+07	2.63547e+07	2.72153e+07	2.74835e+07	2.85603e+07	2.60735e+07	1.62924e+07	1.48928e+07	1.55233e+07	2.11604e+07	2.19923e+07	1.6549e+07	1.91026e+07	1.91543e+07	2.75166e+07	2.94684e+07	2.75954e+07	2.91265e+07	2.13223e+07	2.3627e+07	2.2859e+07	2.8049e+07		glutathione disulfide-nega	1		0.169458		1.92226	2.70184e-07	0.345854		1.19604	0.0205619	0.226502		1.73257	0.0205619	0.292482
NAD+_nega	2.30335e+06	2.26346e+06	2.23245e+06	1.78618e+06	2.0217e+06	1.86421e+06	1.88663e+06	1.76765e+06	2.91845e+06	2.92819e+06	3.28475e+06	3.12592e+06	2.79363e+06	3.13935e+06	3.32827e+06	3.47919e+06	1.24691e+06	1.00039e+06	1.45188e+06	1.28826e+06	979539	812602	990788	2.04382e+06	2.21501e+06	1.79971e+06	2.00424e+06	1.79209e+06	1.83933e+06	1.99818e+06	1.98821e+06	2.54992e+06		NAD+_nega	1		0.15575		1.55019	1.32273e-07	0.20649		0.608608	0.000202921	0.204533		1.00379	0.000202921	0.167838
NADH-nega	95627.9	89062.7	218842	233855	175636	250147	211954	78278.6	383044	291538	308702	229403	297575	301940	280086	189081	69747.5	125004	84379.3	156878	161801	135098	57186.2	177607	177294	278565	261549	266689	274627	251137	216980	245030		NADH-nega	1		0.592518		1.68566	0.0028996	0.783246		0.715013	0.127457	0.40209		1.45697	0.127457	0.642844
dephospho-CoA-nega	11664.2	11616.7	14525.8	19867.4	16196.8	6053.55	16630.9	12483.7		3080.93	12691.8	12702.4	7800.48	6645.07	10526.9	16492.2	4649.32	3380.31	2114.28	5869.02	7649.37	3880.45	8240.88	10513.3	9530.25	18029.7	4978.69	15118.7	7377.15	5538.77	2688.39	5459.63		dephospho-CoA-nega	1		0.433053		0.733051	0.127833	0.39861		0.42459	0.000605711	0.244952		0.630245	0.000605711	0.438021
cyclic bis(3->5) dimeric GMP							1983.23		4724.76											2443.66														cyclic bis(3->5) dimeric GMP	1		#DIV/0!		2.38235	#DIV/0!	#DIV/0!		1.23216	#DIV/0!	#DIV/0!		#DIV/0!	#DIV/0!	#DIV/0!
NADP+_nega	451902	437003	357912	314354	340434	319960	284947	266187	770240	608904	595931	574253	551765	558107	621348	582965	251644	204709	313158	292989	162082	155058	200907	271409	577497	571544	531627	593818	361054	492150	384630	563683		NADP+_nega	1		0.273478		1.75407	2.3259e-06	0.39442		0.667925	0.00271571	0.214786		1.47005	0.00271571	0.385392
NADPH-nega		6091.57	4507.11	4283.53	10947.5	9568.67	20600.2	2658.98	20926.1	5547.48	11289.5	5785.04	5003.78	12662.9	12103.1	5343.73		2377.25	13484.4	3908.98	14698.9		3087.72	4381.86		3489.41	2524.51	2698.29	12010.8	8549.67	2666.19			NADPH-nega	1		1.03826		1.1734	0.638788	1.08753		0.834145	0.679602	0.90267		0.635247	0.679602	0.667954
coenzyme A-nega	10191.9	6329.88	18519.9	18231.8	18853.2	19603.1	9935.07	10685.9	77330.2	25516.9	20401	32263.4	16707	43688.4	33609	32988.3	14480.7	9134.57	10854.2	14691.7	21768.1	13355.8	11856.5	4384.86	16609.3	29689.1	25635.9	44372	20731.5	19124.1	6214.34	24341.6		coenzyme A-nega	1		0.530277		2.51449	0.00854019	1.64699		0.894756	0.574274	0.489664		1.66192	0.574274	1.00275
acetyl-CoA-nega	4548.16		4567.2			2733.2	3096.03	5699.95										8065.41	3029.42		4942.33				2411.87						4001.31	3575.72		acetyl-CoA-nega	1		0.414248		#DIV/0!	#DIV/0!	#DIV/0!		1.29471	0.382604	0.723114		0.80642	0.382604	0.309045
propionyl-CoA-nega							1981.11	3419.13						4951.92																				propionyl-CoA-nega	1		0.532575		1.83396	#DIV/0!	#DIV/0!		#DIV/0!	#DIV/0!	#DIV/0!		#DIV/0!	#DIV/0!	#DIV/0!
butyryl-CoA		3295.71		3508.71	2621.24								4458.62			3397.85			3219.44				6696.76		4432.78						7109.3			butyryl-CoA	1		0.208538		1.25028	0.231047	0.301636		1.57806	0.268638	0.816461		1.83681	0.268638	0.660467
acetoacetyl-CoA-nega																4847.51							3086.79								2254.01			acetoacetyl-CoA-nega	#DIV/0!		#DIV/0!		#DIV/0!	#DIV/0!	#DIV/0!		#DIV/0!	#DIV/0!	#DIV/0!		#DIV/0!	#DIV/0!	#DIV/0!
malonyl-CoA-nega		2769.59					4358.25			6036.49			4395.26						2730.71											3520.36				malonyl-CoA-nega	1		0.445763		1.46352	0.284974	0.564658		0.766211	#DIV/0!	#DIV/0!		0.987778	#DIV/0!	#DIV/0!
3-hydroxybutyryl-CoA				2259.01				2659.1	10124				2786.2		4242.64													5399.83						3-hydroxybutyryl-CoA	1		0.162701		2.32512	0.342893	1.60232		#DIV/0!	#DIV/0!	#DIV/0!		2.19589	#DIV/0!	#DIV/0!
succinyl-CoA-methylmalonyl-CoA-nega													6707.26				3099.8										2557.13	3240.28						succinyl-CoA-methylmalonyl-CoA-nega	#DIV/0!		#DIV/0!		#DIV/0!	#DIV/0!	#DIV/0!		#DIV/0!	#DIV/0!	#DIV/0!		#DIV/0!	#DIV/0!	#DIV/0!
3-hydroxy-3-methylglutaryl-CoA-nega							2773.73									5338.13		4820.87	4184.57	4392.89	4251.6		2576.47			6396.85		5399.69	5976.99		3553.6			3-hydroxy-3-methylglutaryl-CoA-nega	1		#DIV/0!		1.92453	#DIV/0!	#DIV/0!		1.45843	#DIV/0!	#DIV/0!		1.92224	#DIV/0!	#DIV/0!
2-hydroxygluterate	1.21712e+06	1.19912e+06	1.61543e+06	1.72443e+06	1.82869e+06	1.68727e+06	1.83685e+06	1.55363e+06	991537	623048	735396	886766	940215	1.03213e+06	1.27122e+06	1.12657e+06	1.2303e+06	1.29421e+06	1.74005e+06	1.84728e+06	1.40629e+06	1.20899e+06	1.15703e+06	2.25413e+06	875118	974149	1.43394e+06	1.25195e+06	1.12786e+06	1.21061e+06	1.48816e+06	1.56696e+06		2-hydroxygluterate	1		0.223707		0.60074	7.7901e-05	0.161646		0.958598	0.695812	0.289911		0.784105	0.695812	0.198827
2-deoxyglucose-6-phosphate	2.7736e+07	2.82525e+07	2.84832e+07	2.5863e+07	2.58634e+07	2.39126e+07	2.08153e+07	2.03915e+07	2.56089e+07	2.48629e+07	2.37707e+07	2.05816e+07	2.5649e+07	2.45969e+07	2.76064e+07	2.75416e+07	2.27274e+07	2.26225e+07	1.96107e+07	2.11378e+07	2.84783e+07	2.43656e+07	2.40854e+07	2.40957e+07	2.72966e+07	2.62444e+07	2.36167e+07	2.73699e+07	1.94998e+07	2.24673e+07	2.21279e+07	2.18187e+07		2-deoxyglucose-6-phosphate	1		0.179487		0.994538	0.922081	0.154548		0.929495	0.244828	0.157454		0.945975	0.244828	0.165805
3-hydroxybuterate	6041.38		5534.45	3422.71	3143.65	7280.11	9911.54	2439.32	7424.18				3380.19			4311.31	7702.12	11062.4	5031.98	7035.56	6587.72	7417.95		10958.1	11910.3	6586.38	7196.28	2674.05	7793.73	4703.77	12314.5	4411.03		3-hydroxybuterate	1		0.69409		0.93373	0.84259	0.603358		1.47713	0.0734499	0.836014		1.33405	0.0734499	0.915795
4-phosphopantothenate		40300.2	18569.2	12951.3			17219.8	15585.3	29556.1	12006.3	26140.3	18623.1		19447.4	21324.6		80768.1	37317.8		64831.5	100498	259181		33757.8		78675.4			92496.2	7169.61	22412.6	26213.6		4-phosphopantothenate	1		0.745552		1.01232	0.961872	0.60902		4.5906	0.0801734	4.68198		2.16932	0.0801734	2.13374
dehydroascorbic acid	15103.9		8020.11	4678.79		8193.67		3040.68	4630.58	6131.01		5788.55	12253.3		8953.88	13088.8								5251.04			2554.74	2157.88	1844.92	5438.51	7106.51			dehydroascorbic acid	1		0.83962		1.08542	0.792887	0.789246		0.67257	#DIV/0!	#DIV/0!		0.489343	#DIV/0!	0.416344
Urea	891799	877876	789837	1.13154e+06	1.0897e+06	905065	1.07028e+06	1.16957e+06	1.00618e+06	782496	536193	675711	1.1052e+06	758515	1.054e+06	1.226e+06	1.28262e+06	1.10823e+06	1.34638e+06	1.1177e+06	1.17277e+06	1.34136e+06	1.21475e+06	1.15835e+06	1.23375e+06	1.13509e+06	1.0336e+06	1.14321e+06	1.18619e+06	1.03365e+06	1.09428e+06	1.17414e+06		Urea	1		0.200541		0.901412	0.335763	0.272914		1.22919	0.00201786	0.199095		1.13983	0.00201786	0.177067
ethanolamine	21569.1	31621.4	20201	7837.98	21294.4	32362.8	20682.7	25400.9	24825.2	18542	13915.6		42150.1	15968.4	11875	8882.32	20519.4	23203.9	30820.2	23124	33205.4	24125.7	6982.29	15218.4	22883.1	14132.8	6078.71	5447.6	10656	6534.71	18655.8	8847.67		ethanolamine	1		0.481164		0.859864	0.529996	0.576265		0.979163	0.908009	0.496123		0.515203	0.908009	0.332495
Imidazole																																		Imidazole	#DIV/0!		#DIV/0!		#DIV/0!	#DIV/0!	#DIV/0!		#DIV/0!	#DIV/0!	#DIV/0!		#DIV/0!	#DIV/0!	#DIV/0!
glycine	32653.9	31532.1	20031.2	28753.1	32846.8	19131.6	24163.9	19879.1	10118.5	12922.9	15523.4	11372.2	20061.4	11017.7	19999.6	15521.8	40815	37479.5	41717.2	21989.9	40008.5	19933.6	33485.8	25434.6	29361.3	31406.3	22620.8	43711.4	35481.5	31690.6	31566.9	24337.4		glycine	1		0.325358		0.557618	0.000445049	0.197025		1.2482	0.109752	0.44556		1.19706	0.109752	0.372157
alanine	4.25696e+06	3.83616e+06	4.02026e+06	3.72699e+06	3.92398e+06	4.06233e+06	3.81805e+06	4.06357e+06	3.46917e+06	3.35926e+06	3.53133e+06	3.44379e+06	3.70557e+06	3.72566e+06	4.61784e+06	3.9983e+06	4.83729e+06	4.26403e+06	4.37536e+06	4.0637e+06	4.42201e+06	4.41822e+06	4.41759e+06	4.91153e+06	4.72426e+06	4.46982e+06	4.41691e+06	4.42118e+06	4.07624e+06	4.6081e+06	4.97993e+06	5.21371e+06		alanine	1		0.0609103		0.941423	0.162942	0.111556		1.12619	0.000733603	0.0859542		1.16405	0.000733603	0.103066
betaine aldehyde	235585	278715	330278	245886	281440	266028	310219	199329	199022	164375	333060	227471	218180	300317	247154	277616	240972	294360	232930	306539	403443	250616	285858	403616	215433	220334	262112	303020	254733	310285	331110	412623		betaine aldehyde	1		0.220069		0.916048	0.374052	0.250957		1.12613	0.248668	0.307133		1.07552	0.248668	0.294873
choline	1.47029e+08	1.74053e+08	1.41816e+08	2.04507e+08	2.06905e+08	1.20959e+08	1.52278e+08	2.2492e+08	7.19686e+07	2.69086e+08	1.87954e+08	3.0069e+08	1.0033e+08	2.49811e+08		9.16135e+07	1.56866e+08	3.27812e+08	1.11886e+08	2.42632e+08	1.62848e+08	2.55842e+08	2.06233e+08		2.10403e+08	1.08746e+08	2.37141e+08	2.21499e+08	2.88873e+08	2.3087e+08	2.93192e+08	1.28459e+07		choline	1		0.305384		1.05874	0.783859	0.594822		1.21918	0.220049	0.498977		1.16839	0.220049	0.607172
4-aminobutyrate	247513	282147	194667	239391	273247	247414	229787	169823	201538	165326	232174	195966	187401	231398	255282	197762	129094	137352	243554	173484	130017	111099	150918	238012	92899.6	72689.3	66929.8	93882.5	62224.6	95168.4	63537.1	83452.8		4-aminobutyrate	1		0.226016		0.884743	0.128625	0.187614		0.697207	0.00646301	0.242179		0.334813	0.00646301	0.0804613
dimethylglycine	960655	1.20289e+06	788181	765693	1.71312e+06	1.1377e+06	830268	897815	1.36369e+06	856560	1.60147e+06	1.23106e+06	1.64089e+06	1.40272e+06	925810	1.39897e+06	988115	1.08352e+06	1.19519e+06	908305	1.2553e+06	1.71372e+06	1.39159e+06	1.23714e+06	777526	763686	936959	1.01428e+06	1.04344e+06	1.09126e+06	928535	1.28164e+06		dimethylglycine	1		0.430702		1.25612	0.099712	0.471638		1.17798	0.217336	0.433362		0.944676	0.217336	0.330837
serine	1.02413e+07	9.43071e+06	9.47084e+06	9.52568e+06	1.00988e+07	1.07437e+07	1.00441e+07	1.13934e+07	8.00367e+06	7.35943e+06	6.74169e+06	8.46081e+06	8.75252e+06	8.19167e+06	1.00568e+07	8.91978e+06	1.44892e+07	1.29052e+07	1.27221e+07	1.29241e+07	1.46273e+07	1.30846e+07	1.50472e+07	1.35937e+07	1.53138e+07	1.51124e+07	1.39943e+07	1.29614e+07	1.25888e+07	1.3343e+07	1.40267e+07	1.50203e+07		serine	1		0.0956886		0.821342	0.000897324	0.114073		1.3514	4.47166e-07	0.128663		1.38805	4.47166e-07	0.138825
cytosine	492749	440415	473381	448498	495520	462820	499619	554382	396161	390241	311846	409427	492279	396454	602881	525054	672505	565746	631463	615563	573170	613704	678883	611456	623111	715541	555116	611043	637130	702099	634804	615962		cytosine	1		0.105625		0.911299	0.24292	0.20347		1.28316	5.2416e-06	0.127633		1.31738	5.2416e-06	0.144722
Creatinine	432659	456164	540713	519652	486116	487167	456122	502418	427561	500073	574692	426275	491708	527804	560981	533173	425692	420825	446277	392018	419162	543148	503899	523206	592679	512737	576882	494248	428706	476700	511989	536678		Creatinine	1		0.104638		1.04155	0.403939	0.138241		0.946719	0.290772	0.135179		1.06432	0.290772	0.134707
proline	8.55853e+07	8.13528e+07	7.55944e+07	6.59096e+07	7.29249e+07	7.57555e+07	6.19866e+07	6.58683e+07	6.21349e+07	5.52941e+07	6.80032e+07	6.39486e+07	6.58398e+07	6.71537e+07	6.86053e+07	7.32847e+07	7.98103e+07	6.99288e+07	7.91485e+07	7.40422e+07	7.22999e+07	7.17454e+07	7.21923e+07	7.71178e+07	7.48588e+07	7.37789e+07	6.80519e+07	6.61323e+07	6.5438e+07	6.76405e+07	6.85089e+07	7.30794e+07		proline	1		0.157598		0.896213	0.0444943	0.123469		1.01933	0.661818	0.124319		0.953009	0.661818	0.117425
indole	108111	134488	121463	145668	169270	121310	141318	177980	189084	203685	127765	153460	196342	140217	238407	170635	202925	93479.3	165004	108294	131529	134532	134487	188139	167661	165474	142915	154992	103726	167099	129499	158210		indole	1		0.24376		1.26794	0.0297124	0.340776		1.03464	0.764434	0.323854		1.06249	0.764434	0.24355
betaine	6.49845e+07	7.21826e+07	7.62543e+07	6.67446e+07	7.19382e+07	7.18534e+07	6.63066e+07	5.92609e+07	7.28858e+07	6.88888e+07	7.78653e+07	6.7406e+07	8.46323e+07	8.66305e+07	8.52646e+07	7.35149e+07	6.40599e+07	7.04001e+07	6.48381e+07	6.77499e+07	7.70195e+07	6.69355e+07	6.39878e+07	6.89666e+07	5.91652e+07	6.94252e+07	7.1145e+07	7.16031e+07	7.67322e+07	8.11052e+07	7.16274e+07	8.10435e+07		betaine	1		0.110619		1.12295	0.0226203	0.141535		0.989868	0.779494	0.0997845		1.05882	0.779494	0.132715
valine	1.39131e+06	2.47361e+06	1.87209e+06	2.07116e+06	1.7435e+06	1.73506e+06	1.74211e+06	2.50866e+06	1.334e+06	1.20317e+06	966051	1.15295e+06	1.7136e+06	1.31517e+06	1.84617e+06	1.82642e+06	2.69871e+06	2.90453e+06	2.2429e+06	2.16029e+06	2.01003e+06	2.20505e+06	2.75979e+06	2.4085e+06	2.25129e+06	2.84423e+06	2.56532e+06	2.38841e+06	2.32006e+06	2.35485e+06	2.40756e+06	2.54694e+06		valine	1		0.282111		0.730975	0.0118013	0.22504		1.24794	0.0175269	0.30006		1.26653	0.0175269	0.270625
threonine	6.69453e+06	7.69948e+06	6.97477e+06	6.93834e+06	7.93084e+06	7.51597e+06	6.80865e+06	7.17302e+06	6.24883e+06	5.83553e+06	5.0088e+06	5.39248e+06	6.3882e+06	5.54128e+06	7.23645e+06	7.73377e+06	9.91444e+06	9.60672e+06	9.12016e+06	8.78217e+06	9.49939e+06	9.2539e+06	9.87487e+06	8.63257e+06	9.31564e+06	1.00561e+07	9.60837e+06	8.86108e+06	8.08231e+06	8.49803e+06	8.55939e+06	1.00991e+07		threonine	1		0.0879384		0.855371	0.0128254	0.139824		1.29356	2.7047e-07	0.103938		1.26577	2.7047e-07	0.130546
homoserine	4376.19	8363.56	4509.03	11506.9	5416.6	12185.7	4745.88	1904.04	8774.63		5641.36	4591.94	3368.18	3970.42	10504.7	14371.2	12880.5	11491.6	2513.58	10286.8	5287.87	3498.49	21121.3	10101	12728	15121.8	7598.49	10744.9	21040.9	7544.66	10658.5	10537.1		homoserine	1		0.784583		1.10436	0.734756	0.866881		1.45603	0.245793	1.2159		1.81056	0.245793	1.20579
purine	93212.5	148065	101221	156027	65287.7	110426	97038.2	81084.7	109399	103442	88207.1	80549.8	206315	80041.4	219372	138789	139720	151012	109594	94104.4	69697.1	104392	78883.2	359325	128472	120482	101052	69065.9	111156	131816	207052	243219		purine	1		0.414744		1.20385	0.352141	0.630476		1.29842	0.377026	0.956507		1.30498	0.377026	0.661225
cysteine	917055	1.00188e+06	387519	913199	1.05756e+06	466478	956384	347814	1.00042e+06	1.00149e+06	1.00953e+06	358273	1.10597e+06	1.1856e+06	1.36517e+06	1.26387e+06	475053	1.26291e+06	382170	491181	410313	911128	812600	734688	1.82043e+06	2.03091e+06	1.774e+06	2.30828e+06	1.84813e+06	2.04669e+06	1.76744e+06	2.43839e+06		cysteine	1		0.560501		1.37078	0.0847513	0.67649		0.906109	0.646085	0.540473		2.65122	0.646085	1.10307
nicotinamide	3.73667e+07	4.41651e+07	4.65932e+07	5.83752e+07	5.01471e+07	4.97778e+07	4.73031e+07	5.82027e+07	8.08623e+07	4.32787e+07	3.79838e+07	4.45408e+07	6.89187e+07	4.57767e+07	6.84637e+07	5.77786e+07	6.08469e+07	4.4121e+07	6.28943e+07	4.69086e+07	4.75483e+07	6.42243e+07	4.99101e+07	5.04533e+07	5.45712e+07	5.73342e+07	5.01461e+07	5.33633e+07	5.51449e+07	5.51442e+07	5.38609e+07	6.0358e+07		nicotinamide	1		0.201738		1.14205	0.264564	0.354523		1.08924	0.263287	0.225155		1.12245	0.263287	0.17124
Imidazoleacetic acid	694555	679128	608421	594268	664561	619987	673590	582940	622282	506294	498287	706984	703333	727644	651470	664227	918425	818829	617979	717347	841447	843382	806164	883604	881455	836967	889997	775845	721871	914142	725192	828204		Imidazoleacetic acid	1		0.0952114		0.992784	0.89647	0.153821		1.25984	0.000535852	0.172567		1.28456	0.000535852	0.144564
thymine	77422.9	32985.6	51416.1	50683.8	64060.6	90042.2	58137.9	60299.3	65337	55286.2	99525.5	72147.2	76433.5	78808	74308.1	76505.6	32632	38479.6	24820.5	37392.6	47778.5	42593.7	37994	56109.7	53532.1	53830.5	56662	62988.1	61529.6	59689.1	40067	78782.5		thymine	1		0.405268		1.23359	0.083036	0.410032		0.655194	0.00973738	0.243929		0.962957	0.00973738	0.329345
DL-Pipecolic acid	6.68968e+07	3.84564e+07	6.54559e+07	5.8115e+07	6.53338e+07	6.19921e+07	5.74684e+07	5.03064e+07	5.37474e+07	4.56683e+07	5.07578e+07	5.27132e+07	5.62342e+07	2.22808e+07	5.04416e+07	5.53829e+07	5.49489e+07	5.03315e+07	6.02177e+07	5.67665e+07	6.06804e+07	5.2697e+07	5.82894e+07	6.55537e+07	2.23564e+07	5.00846e+07	4.99565e+07	5.04322e+07	5.04214e+07	4.96432e+07	4.4151e+07	5.32553e+07		DL-Pipecolic acid	1		0.234206		0.834494	0.0850409	0.235537		0.990216	0.883541	0.184052		0.798019	0.883541	0.217155
N-Acetylputrescine	4469.53	6485.84	8416.79	7486.01	7398.74	7235.12	2718.1	15288.6	3356.03	3607.48	13216.2	10336.7	3671.19	10354.3	7345.59	17745.3	16977.7	13729.3	3595.19	16386.9	13679.6	11147.8	7391.73	6049.8	1641.81	3696.24	8487.77	4584.37	10950.8	12112.1	5739.73	5427.87		N-Acetylputrescine	1		0.699143		1.17032	0.582586	0.907468		1.49512	0.11341	0.994799		0.884735	0.11341	0.65504
hydroxyproline	1.80107e+07	1.50701e+07	1.56699e+07	1.6177e+07	1.66888e+07	1.68343e+07	1.6896e+07	1.77853e+07	1.4365e+07	1.39639e+07	1.30628e+07	1.34435e+07	1.58761e+07	1.49967e+07	1.79701e+07	1.72813e+07	2.09248e+07	1.91844e+07	1.98161e+07	1.82386e+07	2.09944e+07	1.97567e+07	1.99495e+07	2.0161e+07	2.15272e+07	2.18026e+07	1.98317e+07	2.18198e+07	1.89873e+07	2.09658e+07	1.98533e+07	2.29561e+07		hydroxyproline	1		0.0844707		0.908567	0.0537837	0.120266		1.19449	8.03223e-06	0.0893685		1.25998	8.03223e-06	0.109218
leucine-isoleucine	6.71756e+07	8.14816e+07	9.61722e+07	9.91196e+07	8.58118e+07	8.54856e+07	9.83152e+07	1.08478e+08	6.17564e+07	6.62841e+07	5.10383e+07	6.39457e+07	8.46074e+07	6.91704e+07	1.05378e+08	8.88087e+07	1.25915e+08	1.36727e+08	1.06844e+08	1.21277e+08	1.08481e+08	1.15164e+08	1.16411e+08	1.56075e+08	1.1128e+08	1.15318e+08	1.24386e+08	1.07817e+08	1.17955e+08	1.26253e+08	1.35989e+08	1.53249e+08		leucine-isoleucine	1		0.201949		0.818499	0.0522504	0.227698		1.36681	0.000500008	0.266234		1.37423	0.000500008	0.255965
ornithine	3.35174e+06	3.3613e+06	3.11143e+06	4.58008e+06	3.96222e+06	4.00431e+06	4.00939e+06	4.43964e+06	4.83042e+06	3.45884e+06	2.10121e+06	2.85625e+06	3.76478e+06	2.77032e+06	3.9249e+06	3.88898e+06	6.18756e+06	3.90077e+06	4.96073e+06	4.30361e+06	5.13456e+06	6.74527e+06	6.65409e+06	5.23902e+06	5.23998e+06	4.96148e+06	5.27713e+06	4.59896e+06	5.17398e+06	5.2648e+06	5.27328e+06	4.87444e+06		ornithine	1		0.194988		0.895379	0.27445	0.252809		1.39927	0.00241148	0.334262		1.3194	0.00241148	0.193016
asparagine	1.19029e+07	1.23076e+07	1.07711e+07	1.08455e+07	1.16825e+07	1.19525e+07	1.07299e+07	1.11511e+07	8.84099e+06	8.44746e+06	8.36017e+06	8.74909e+06	9.89205e+06	8.82297e+06	1.08951e+07	1.08058e+07	1.43979e+07	1.51638e+07	1.39026e+07	1.33826e+07	1.40637e+07	1.35054e+07	1.51825e+07	1.52301e+07	1.54804e+07	1.4177e+07	1.32844e+07	1.58235e+07	1.31061e+07	1.48948e+07	1.24674e+07	1.46603e+07		asparagine	1		0.0765399		0.81904	0.000257542	0.100874		1.25711	7.05842e-07	0.0952973		1.24688	7.05842e-07	0.124531
aspartate	3.9605e+06	4.12422e+06	4.38456e+06	5.18302e+06	5.41667e+06	5.1414e+06	5.18365e+06	4.7998e+06	3.71053e+06	2.49414e+06	2.18778e+06	2.72396e+06	3.47465e+06	2.6384e+06	3.74086e+06	3.36205e+06	6.53219e+06	6.07019e+06	5.36367e+06	4.9321e+06	6.90523e+06	6.54394e+06	6.03463e+06	5.97902e+06	3.64694e+06	4.03131e+06	4.40142e+06	4.04459e+06	4.49832e+06	4.42224e+06	4.04528e+06	5.3437e+06		aspartate	1		0.162995		0.637076	3.14197e-05	0.145527		1.2662	0.000839126	0.199216		0.901554	0.000839126	0.148219
adenine	3.05622e+06	3.39995e+06	3.43688e+06	3.42534e+06	3.58623e+06	3.6688e+06	3.86492e+06	3.61693e+06	4.32e+06	3.84045e+06	3.68155e+06	3.48714e+06	4.25994e+06	3.61867e+06	4.33465e+06	3.50788e+06	4.15814e+06	3.43641e+06	3.78126e+06	4.07916e+06	3.76442e+06	3.77926e+06	3.37948e+06	3.79125e+06	4.01262e+06	4.20998e+06	3.87162e+06	3.8259e+06	3.7934e+06	4.0586e+06	3.46888e+06	4.59659e+06		adenine	1		0.0962653		1.10675	0.0299854	0.129122		1.07536	0.0570551	0.106256		1.13482	0.0570551	0.122201
Methylcysteine	2.39067e+06	2.91761e+06	2.83156e+06	3.03319e+06	2.40829e+06	2.36107e+06	2.82824e+06	2.61974e+06	2.66513e+06	2.7394e+06	2.1596e+06	2.43242e+06	3.29422e+06	2.46871e+06	3.17704e+06	2.71337e+06	3.23629e+06	3.17013e+06	2.88635e+06	3.1763e+06	2.85808e+06	3.12214e+06	2.89215e+06	3.03478e+06	3.19203e+06	3.35261e+06	3.23184e+06	3.06043e+06	3.03874e+06	3.13572e+06	2.88209e+06	3.53923e+06		Methylcysteine	1		0.139754		1.01213	0.845174	0.17319		1.13959	0.00374917	0.125933		1.18898	0.00374917	0.13976
homocysteine	50885.9	60317.8	55002.3	52449.9	17062.2	55399	55174.4	60690.8	72979	22672	47342.7	45948.9	59847.4	54783.4	74776.8	44555.7	44401.5	35685.7	42107.2	35280.5	51285.5	39360.2	53098.5	59882.9	34009.1	61003.4	55416.8	64698.9	57402.9	57312.4	49407.4	71226.9		homocysteine	1		0.391349		1.03913	0.801616	0.43917		0.887267	0.34586	0.300906		1.10687	0.34586	0.376098
methylnicotinamide	22066	110313	96848.6	134051	100014	183083	111651	92674.8	14150.8	12533.2	47854.7	45271.5	53592.4	87857.6	41930	67434.3	127272	187176	430545	237161	311556	212804	589859	114827	90228.6	198357	142193	122332	142314	64907.1	117792	174046		methylnicotinamide	1		0.597312		0.435669	0.00528585	0.299568		2.59927	0.0128261	1.88262		1.23683	0.0128261	0.660404
histidinol	8145.84	3871.72	3504.48	12477.6	7883.55	6387.16	9507.36	4937.35	12153	11712.4				4381.23	11053	6493.97		16827.9		9286.9	4119.26	3408.16	5671.52	7439.67	6094.52	7560.84			10136.9	9053.37	8869.82	14899.3		histidinol	1		0.607669		1.29189	0.283419	0.742889		1.09914	0.746785	0.839875		1.33097	0.746785	0.7128
lysine	4.67397e+06	4.77911e+06	4.47512e+06	5.42783e+06	4.9402e+06	5.22568e+06	5.38156e+06	5.90294e+06	5.17441e+06	4.70186e+06	2.9265e+06	4.40317e+06	5.31257e+06	3.98626e+06	6.17719e+06	5.46653e+06	7.69364e+06	6.25321e+06	7.14195e+06	5.62714e+06	6.54543e+06	7.32641e+06	7.15396e+06	6.16739e+06	6.83465e+06	6.22503e+06	5.78653e+06	6.39382e+06	7.03481e+06	6.11698e+06	6.47231e+06	7.15965e+06		lysine	1		0.130369		0.934866	0.411417	0.215115		1.3211	7.89364e-05	0.18344		1.27489	7.89364e-05	0.149894
glutamine	1.03711e+08	1.02405e+08	9.40339e+07	9.57194e+07	9.92441e+07	1.04511e+08	9.34502e+07	9.7357e+07	8.67713e+07	9.26752e+07	8.11613e+07	8.31691e+07	9.81248e+07	8.78207e+07	1.0064e+08	9.87939e+07	1.37782e+08	1.19529e+08	1.11221e+08	1.12724e+08	1.36654e+08	1.17023e+08	1.34231e+08	1.19488e+08	1.30896e+08	1.33366e+08	1.22135e+08	1.27288e+08	1.18661e+08	1.2212e+08	1.21377e+08	1.32295e+08		glutamine	1		0.0623536		0.922478	0.0255111	0.0860706		1.25077	3.44652e-05	0.123404		1.27543	3.44652e-05	0.0803174
O-acetyl-L-serine	16472.4	3876.93	4872.88	2273.67	2948.78	32807.1	30898.8	2709.88	24976.4	20314	33870.3	14417.8	19494.5	20388.5	30530.7	28983.5	5561.9	3360.67	6766.83	13684	2950.95	3382.91	5147.72	26742.7	4409.23	13865.2	21250.3	21053.3	3802.35	12572.3	12896.3	10453.2		O-acetyl-L-serine	1		1.5227		1.99231	0.0355531	2.21322		0.697887	0.512061	1.00929		1.03553	0.512061	1.23799
glutamate	8.45519e+07	9.00162e+07	8.03197e+07	7.69597e+07	8.06817e+07	8.50084e+07	7.95954e+07	7.03745e+07	7.49103e+07	5.70193e+07	7.37365e+07	6.16569e+07	6.4249e+07	6.66241e+07	7.01914e+07	6.83313e+07	7.34635e+07	6.73563e+07	8.35728e+07	7.9655e+07	8.10225e+07	6.56063e+07	7.17832e+07	8.48824e+07	6.07487e+07	6.52279e+07	5.88738e+07	6.13479e+07	5.73832e+07	6.00076e+07	5.86691e+07	6.74603e+07		glutamate	1		0.102673		0.8289	0.000377511	0.0959056		0.937969	0.154615	0.113849		0.756313	0.154615	0.0695319
methionine	5.54934e+06	7.4869e+06	8.2162e+06	9.27731e+06	8.15334e+06	8.59492e+06	9.6804e+06	1.08645e+07	6.25333e+06	5.40329e+06	5.15256e+06	5.83844e+06	7.16615e+06	5.50461e+06	8.89257e+06	7.63722e+06	1.18372e+07	1.31477e+07	1.09072e+07	1.11591e+07	1.17214e+07	1.19772e+07	1.28656e+07	1.2084e+07	9.78753e+06	1.2081e+07	1.22875e+07	1.06234e+07	1.18437e+07	1.13583e+07	1.24916e+07	1.56129e+07		methionine	1		0.263956		0.764464	0.0155975	0.210101		1.41102	6.41608e-05	0.278288		1.41672	6.41608e-05	0.332991
guanine	128329	62492.1	93878.7	84587.1	89254.5	93390.1	96549.9	89034.1	92425.4	79616.1	61214.7	78811.7	128082	69737.7	101220	74391.3	52508.4	22853.7	34905.1	52043.1	65506.8	45506.7	29120.6	79438.3	63875.6	64127.3	60861	63315.6	51991.2	56533.5	55578.7	102911		guanine	1		0.277322		0.92947	0.520024	0.293518		0.517796	0.000277801	0.228668		0.703976	0.000277801	0.221641
histidine	4.28863e+07	4.32076e+07	3.84066e+07	4.57686e+07	4.3845e+07	4.86366e+07	5.12395e+07	5.3077e+07	3.83306e+07	4.06925e+07	3.07852e+07	3.70533e+07	4.6865e+07	3.92593e+07	5.09909e+07	4.48356e+07	7.07499e+07	6.53722e+07	6.10865e+07	6.15637e+07	6.26204e+07	6.81268e+07	6.64297e+07	6.63271e+07	6.47305e+07	6.55025e+07	6.36307e+07	6.39106e+07	6.31913e+07	6.05249e+07	6.6598e+07	7.1121e+07		histidine	1		0.149292		0.895782	0.111288	0.166959		1.42284	2.24569e-07	0.167081		1.41448	2.24569e-07	0.163761
2-Aminooctanoic acid	2.69651e+06	2.55589e+06	4.28439e+06	4.01766e+06	4.28498e+06	3.64668e+06	4.65221e+06	3.24677e+06	2.13867e+06	2.0594e+06	3.24576e+06	2.30504e+06	3.2385e+06	3.48066e+06	4.28015e+06	3.49454e+06	3.2417e+06	4.87263e+06	2.97939e+06	5.2564e+06	4.93083e+06	3.31262e+06	3.81882e+06	8.67514e+06	2.199e+06	3.77057e+06	3.88353e+06	3.78961e+06	4.42721e+06	4.98785e+06	6.35308e+06	7.36041e+06		2-Aminooctanoic acid	1		0.298578		0.825	0.122085	0.276093		1.26212	0.196028	0.569733		1.25136	0.196028	0.515405
carnitine	4.97704e+07	4.72494e+07	5.95281e+07	4.56692e+07	4.49308e+07	4.54308e+07	4.74072e+07	3.75598e+07	4.06778e+07	4.09071e+07	5.56071e+07	4.19467e+07	4.43798e+07	5.28737e+07	5.45178e+07	3.92387e+07	4.12103e+07	4.93169e+07	3.56038e+07	4.46186e+07	6.04211e+07	3.79189e+07	4.20727e+07	6.99218e+07	3.41311e+07	3.6851e+07	4.23251e+07	4.37504e+07	3.91594e+07	4.4486e+07	5.42811e+07	6.15793e+07		carnitine	1		0.183398		0.980408	0.780416	0.193306		1.00937	0.926609	0.283226		0.944425	0.926609	0.229483
Methionine sulfoxide	359836	357366	326523	423417	325391	354502	256320	372393	265310	205873	228599	227679	341708	263375	428641	358012	451667	461255	470068	377838	333336	361916	461041	404313	381922	493694	513427	343217	395832	406073	397893	429119		Methionine sulfoxide	1		0.19439		0.835522	0.0992176	0.2524		1.19659	0.017001	0.224349		1.21091	0.017001	0.234147
phenylalanine	4.39969e+06	3.26886e+06	6.28099e+06	6.87113e+06	3.01794e+06	3.23859e+06	6.52903e+06	7.37252e+06	4.40503e+06	4.73094e+06	2.39497e+06	3.38349e+06	5.08717e+06	3.01377e+06	7.01589e+06	5.71747e+06	4.77542e+06	3.94966e+06	4.61451e+06	4.24008e+06	3.74973e+06	4.54555e+06	4.6163e+06	1.4547e+07	7.45593e+06	4.19599e+06	7.05025e+06	3.56973e+06	4.87623e+06	8.38631e+06	9.16923e+06	9.59099e+06		phenylalanine	1		0.50454		0.872372	0.449145	0.429547		1.09906	0.728703	0.808327		1.32495	0.728703	0.653199
Pyridoxamine			3505.02	2712.22	10078.7		9349.17	5347.58	10800	4931.71	7057.71	3971.65	13377.8	7119.67		3812.04	2505.73	14772	4984.1		4725.66	5481.95	9745.86	4835.59			3135.98	6900.31	5342.31	4498.56		8441.79		Pyridoxamine	1		0.766232		1.17702	0.605162	0.863485		1.08438	0.821638	0.891939		0.913728	0.821638	0.596939
pyridoxine	1.21935e+07	1.44061e+07	1.61573e+07	1.71952e+07	1.66933e+07	1.562e+07	1.77871e+07	2.03824e+07	1.70543e+07	1.22432e+07	1.07078e+07	1.31247e+07	1.97848e+07	1.36125e+07	1.87175e+07	1.71263e+07	1.64597e+07	1.74775e+07	1.68795e+07	1.46796e+07	1.57271e+07	1.68805e+07	1.61976e+07	2.2319e+07	1.77906e+07	1.79999e+07	1.69311e+07	1.79113e+07	1.97436e+07	2.00342e+07	1.88851e+07	2.31304e+07		pyridoxine	1		0.20932		0.938177	0.49697	0.245441		1.04742	0.520898	0.208848		1.1686	0.520898	0.210268
1-Methyl-Histidine	5.86614e+06	5.53097e+06	6.23188e+06	8.02311e+06	6.675e+06	7.44867e+06	8.0721e+06	8.24768e+06	5.24118e+06	6.09599e+06	4.52572e+06	5.92627e+06	7.81122e+06	6.1074e+06	7.96317e+06	6.37439e+06	9.48877e+06	1.06955e+07	8.41214e+06	9.66927e+06	8.88993e+06	1.07513e+07	9.57233e+06	1.06594e+07	1.0194e+07	1.00357e+07	1.00593e+07	7.3998e+06	1.02679e+07	1.15756e+07	1.02397e+07	1.16801e+07		1-Methyl-Histidine	1		0.216852		0.892145	0.198983	0.215397		1.39295	6.29092e-05	0.247359		1.45202	6.29092e-05	0.290456
N-acetyl-L-ornithine	32838.6	10251.1	6451.43		7002.31	32278.5		16496.3	14724.3	14329.7	17126.9	13532.6	22373.2	15329.6	17687.1	32015.1	44069.3	23148	15850.6		7820.53	9248.36	36077.6	9137.39	52817.9	27368.9	5700.42		43335.8	4845.51	59815.2			N-acetyl-L-ornithine	1		0.979812		1.04767	0.868441	0.806491		1.18296	0.675494	1.15931		1.84093	0.675494	1.85335
arginine	2.85366e+08	3.10117e+08	2.76382e+08	3.05072e+08	2.89804e+08	2.82902e+08	2.86663e+08	2.90049e+08	2.95003e+08	2.86139e+08	2.25751e+08	2.66758e+08	3.41347e+08	2.66774e+08	3.48791e+08	3.31809e+08	3.57655e+08	3.23105e+08	3.22742e+08	3.08876e+08	3.31778e+08	3.65296e+08	3.55588e+08	3.20549e+08	3.58668e+08	3.61118e+08	3.23654e+08	3.17416e+08	3.5052e+08	3.37904e+08	3.24518e+08	3.53752e+08		arginine	1		0.0549994		1.01548	0.778151	0.152618		1.15442	0.000101796	0.0846112		1.17246	0.000101796	0.075107
citrulline	2.31325e+06	2.30994e+06	2.27595e+06	2.55821e+06	2.70012e+06	2.59632e+06	2.74609e+06	3.21616e+06	1.95183e+06	1.70844e+06	1.46746e+06	1.79288e+06	2.26834e+06	2.07299e+06	2.98615e+06	2.58133e+06	4.26711e+06	3.57488e+06	3.7474e+06	3.40116e+06	3.26846e+06	3.61659e+06	3.85193e+06	3.42966e+06	4.08839e+06	3.55446e+06	3.86466e+06	3.57648e+06	3.67143e+06	3.70873e+06	4.27315e+06	4.02525e+06		citrulline	1		0.170626		0.812386	0.0341376	0.214842		1.40747	9.64149e-06	0.208841		1.48496	9.64149e-06	0.205764
N-carbamoyl-L-aspartate	10846.1	11898	22473.1	27682.7	34162	25972.3	29713.3	26937.7	6747.71	15404.4	11979.4	19032	21139.6	27430.1	10488	22195.5	37102.6	31241.5	31605.7	14907.5	38833.1	26410.9	37538.9	30265.7	21169.9	24426.1	21938.2	28073.8	25583.1	22129.6	37344.6	52636		N-carbamoyl-L-aspartate	1		0.495515		0.70863	0.0916812	0.382115		1.30693	0.0918346	0.563043		1.22994	0.0918346	0.627743
glucosamine	593227	320331	177568	75861.1	457680	505710	398729	389241	371038	297381	110007	358642	434341	381925		279794	811054	143407	47551.3	92432.6	926373	127884	751948	688448	113332	112040	83693.9	112314	44800.5	121858	113213	107033		glucosamine	1		0.660071		0.874517	0.550101	0.500799		1.22984	0.57523	1.18126		0.276966	0.57523	0.1467
tyrosine	3.87412e+06	5.31511e+06	5.51621e+06	6.07544e+06	5.38349e+06	5.34081e+06	5.14392e+06	5.40351e+06	4.4147e+06	3.36803e+06	3.2091e+06	3.78927e+06	5.19338e+06	4.52455e+06	5.56232e+06	5.64499e+06	6.91757e+06	7.28014e+06	6.51343e+06	6.51345e+06	6.41201e+06	6.92135e+06	6.97011e+06	6.59649e+06	6.06209e+06	6.62383e+06	6.81138e+06	6.22381e+06	6.74361e+06	7.01433e+06	6.79057e+06	7.69544e+06		tyrosine	1		0.167399		0.849087	0.0689465	0.207452		1.28707	2.41643e-05	0.162762		1.28327	2.41643e-05	0.179008
Phosphorylcholine	1.95047e+08	1.64095e+08	1.83097e+08	1.80152e+08	1.49825e+08	1.91931e+08	1.73507e+08	1.20866e+08	1.26258e+08	1.48644e+08	1.66031e+08	1.17892e+08	9.88843e+07	1.44359e+08	9.5985e+07	1.4169e+08	8.71709e+07	6.02476e+07	1.68369e+08	1.11108e+08	7.81819e+07	6.27773e+07	9.43636e+07	1.51368e+08	5.46171e+07	3.94537e+07	5.97691e+07	5.50663e+07	4.8276e+07	5.49462e+07	5.10305e+07	6.72403e+07		Phosphorylcholine	1		0.205227		0.76535	0.00605505	0.18306		0.598877	0.00103937	0.249602		0.316815	0.00103937	0.0664204
3-phospho-serine	66636.4	17943.6	7081.44	8323.74	34525.5	4408.99	8631.8	6784.29	23594	5536.14	12907.7	10783.4	4999.2	5479.49	4165	17836.9	28761.5		4802.59	25491.1	15876.3	5442.26	18534	7965.02	28249.5	10413.6	32781.7			11517.5	8437.36	10401.7		3-phospho-serine	1		1.57622		0.552703	0.299206	0.717133		0.791393	0.656467	1.01364		0.879479	0.656467	1.1247
N6-Acetyl-L-lysine	2.64409e+07	3.61004e+07	2.42479e+07	2.91847e+07	1.60311e+07	3.0934e+07	2.95416e+07	2.24375e+07	2.10653e+07	3.20985e+07	1.38262e+07	2.50693e+07	2.84127e+07	3.36151e+07	3.52277e+07	2.89778e+07	3.5861e+07	3.162e+07	1.89302e+07	3.78588e+07	3.3468e+07	3.81642e+07	3.86063e+07	3.41938e+07	3.18319e+07	2.95201e+07	1.27667e+07	1.42535e+07	3.27526e+07	1.66197e+07	2.60209e+07	3.07176e+07		N6-Acetyl-L-lysine	1		0.319838		1.0157	0.900407	0.35082		1.25025	0.0494206	0.370249		0.904917	0.0494206	0.373325
Acetyllysine	2.10159e+07	1.86657e+07	1.87622e+07	2.4783e+07	2.23183e+07	1.99325e+07	2.47217e+07	2.09588e+07	3.49402e+07	1.90585e+07	1.57636e+07	2.66107e+07	2.59234e+07	1.57049e+07	3.23624e+07	2.13796e+07	3.28991e+07	2.83484e+07	2.13107e+07	2.21326e+07	2.14303e+07	3.14023e+07	3.0225e+07		2.06205e+07	2.35326e+07	2.26649e+07	1.31811e+07	3.17059e+07	2.24547e+07	1.00477e+07	1.592e+07		Acetyllysine	1		0.158507		1.12027	0.356787	0.361432		1.25363	0.0175936	0.274855		0.935552	0.0175936	0.335399
N-acetyl-glutamine	94585.1	135306	112425	133619	112070	72875.6	89692.4	105030	111473	111478	93801.8	62050.3	118585	108869	99288	116023	79846	39718.8	85749.3	56874.4	60030.3	47313.4	100205	122735	47542.5	38781.1	71105.5	45501.1	80011.7	44978.8	83147.7	56256.9		N-acetyl-glutamine	1		0.282145		0.96022	0.675676	0.257368		0.69246	0.0200068	0.298576		0.546193	0.0200068	0.195031
N-acetyl-glutamate	107561	71109.1	67656.8	14998.6	73515.5	11892.4	73488.4	95690.7	84065.4	45142.8	67747.6	58462.4	68728.1	73960.1	125453	75171.6	15311.3	90440.9	13514.3	13914.6	67235.2	65892.1	79369.2	114735		115198	83622.2	99654.4	88837.8	19587.3	14323.8			N-acetyl-glutamate	1		0.753338		1.16053	0.493623	0.718083		0.892423	0.711219	0.7686		1.08862	0.711219	0.879818
Ng,NG-dimethyl-L-arginine	1.3424e+07	1.47478e+07	1.16458e+07	1.4224e+07	1.40906e+07	1.29262e+07	1.48749e+07	1.47546e+07	1.59756e+07	1.23877e+07	1.18912e+07	1.6623e+07	1.7098e+07	1.30219e+07	1.67371e+07	1.40312e+07	1.63263e+07	1.31705e+07	1.44748e+07	1.37021e+07	1.45326e+07	1.9821e+07	1.74702e+07		1.4362e+07	1.46146e+07	1.39614e+07	1.11767e+07	1.55356e+07	1.4871e+07	1.5771e+07	1.73379e+07		Ng,NG-dimethyl-L-arginine	1		0.114373		1.06394	0.315738	0.176284		1.13057	0.0756642	0.194253		1.06272	0.0756642	0.154077
Acetylcarnitine DL	1.33011e+07	1.65506e+07	1.97122e+07	1.49372e+07	1.83955e+07	1.79746e+07	1.42537e+07	1.34842e+07	1.92363e+07	1.30458e+07	2.45189e+07	1.86511e+07	1.92378e+07	2.36817e+07	2.09208e+07	2.01705e+07	1.67793e+07	2.61109e+07	1.48011e+07	2.32488e+07	3.3369e+07	2.11965e+07	2.2079e+07	1.77312e+07	1.23752e+07	1.81981e+07	1.76916e+07	1.83176e+07	1.97892e+07	2.26321e+07	2.05128e+07	2.30021e+07		Acetylcarnitine DL	1		0.214111		1.2399	0.0229072	0.287863		1.36317	0.021869	0.422324		1.18591	0.021869	0.275303
tryptophan	660156	690858	764155	871765	719922	860741	863258	915554	651265	573790	430889	496546	785861	576172	1.03526e+06	778859	1.17737e+06	993578	1.03216e+06	879709	997721	928864	1.0502e+06	1.68802e+06	764915	1.08571e+06	748681	970369	1.03308e+06	973303	1.10675e+06	1.22491e+06		tryptophan	1		0.171786		0.839631	0.119303	0.2653		1.37836	0.00774595	0.363346		1.24602	0.00774595	0.256703
Kynurenine	6876.98	14775.9	10482.2	33530.5	21163.4	21430.9	33255.7	28168.8	5412.63	6770.38	9667	4607.48	18356.8	14380.3	15006.8	4022.71	21944.3	19984.8	15221.9	22647.7	20437.7	14167.3	16259.5	32960.5	13293.2	22682.1	9404.47	18103.2	19052.6	25126.3	25420.6	24175.4		Kynurenine	1		0.670211		0.460998	0.0135088	0.338293		0.964282	0.857105	0.536316		0.926766	0.857105	0.519092
N-acetyl-glucosamine	22734.3	28151.4	47154.5	44024.4	42012.5	9349.84	52258	45936.6	19573.5	17992.5	10404.2	25215.6	51035.8	36908.2	35249.3	38396.7	59928.5	51013.5	51409.2	66520.7	58252.4	45308	53364.6	57438.8	17031.4	23445.6	57141.9	18355	73726.9	53811.2	53791.8	52661.6		N-acetyl-glucosamine	1		0.574349		0.80507	0.330225	0.490626		1.5199	0.00512159	0.642668		1.20007	0.00512159	0.757689
Flavone		70574.5	22349	26447.1	28581.3	56947.2	27077.8	26758	23321.7	55814.9	73560.9	28259.8	87826.2	40345.3	75639.5	29106.5	76195.8	40294.3	104088	43581.5	78624	49814.4	72190.6	16989.7	43044.9	49783.2	53609.9	64757	10644.9	48232.9	18278.6	22427.1		Flavone	1		0.72011		1.39966	0.223873	0.982138		1.6293	0.0828626	1.11526		1.051	0.0828626	0.747359
cystathionine	331263	328979	305475	247472	257960	292075	322755	289873	299045	343373	267376	281800	225243	240659	192691	362083	192897	208656	245236	169585	205027	201122	166164	197309	241614	293128	223741	277411	165455	222500	213848	247820		cystathionine	1		0.150414		0.931148	0.394482	0.218247		0.667549	6.54643e-06	0.109207		0.793617	6.54643e-06	0.157667
5-methoxytryptophan	6996.09		2531.1	3118.63	3943.06	6278.68						3458.39	8917.08		3158.02	4363.24										5234.64		3767.93	2390.96		3530.72			5-methoxytryptophan	1		0.607952		1.08761	0.802442	0.749316		#DIV/0!	#DIV/0!	#DIV/0!		0.815798	#DIV/0!	0.433934
Cystine	565124	705268	922923	1.46059e+06	1.37208e+06	1.0889e+06	1.49878e+06	2.48107e+06	590679	562711	316835	415458	617533	433762	696574	533284	2.00804e+06	2.81312e+06	2.43896e+06	2.16566e+06	2.48536e+06	3.31887e+06	2.99019e+06	1.98402e+06	1.63674e+06	1.26767e+06	854170	848400	935140	912580	950891	982716		Cystine	1		0.674353		0.412773	0.0042136	0.219932		2.00146	0.000385629	1.02804		0.830959	0.000385629	0.45099
cytidine	68222.4	76562.8	37080.8	177408	119561	155912	201544	157349	118455	111568	105526	81329.6	113584	104605	189573	184226	55408.5	143662	127681	227031	186092	242583	94078	264793	49102.8	143070	265016	235376	348131	318442	371537	405903		cytidine	1		0.665755		1.01532	0.940096	0.572503		1.34991	0.216132	0.875177		2.15025	0.216132	1.40754
biotin	426321	399011	378577	346182	305825	137758	332449	333286	452900	375120	490656	357217	411438	417771	500741	454361	300604	349338	313704	275177	296721	275597	136922	363098	2604.05	345001	311046	129173	402704	345692	382455	433124		biotin	1		0.374251		1.30112	0.0148176	0.377548		0.869051	0.289644	0.310022		0.884331	0.289644	0.50721
deoxyadenosine		6085.43	3506.65	3509.15	7891.22	10471.3	5327.28	7973.01		4314.05			8915.29	4445.35					8006.06			4984.57		5262.29	3888.34			3778.56	4119.18			6977.25		deoxyadenosine	1		0.565636		0.921296	0.784042	0.550971		0.951436	0.853955	0.461536		0.733531	0.853955	0.378661
Glycerophosphocholine	1.33279e+08	1.23333e+08	1.2236e+08	1.01344e+08	1.10593e+08	1.13727e+08	1.12004e+08	1.10133e+08	7.864e+07	8.19036e+07	9.09132e+07	8.42234e+07	6.56392e+07	7.06807e+07	8.00863e+07	7.92988e+07	5.36272e+07	3.99781e+07	8.80825e+07	6.0266e+07	4.87063e+07	4.14802e+07	5.35731e+07	9.06897e+07	2.88999e+07	2.85525e+07	2.97973e+07	2.64727e+07	2.33852e+07	2.55169e+07	2.38347e+07	3.26361e+07		Glycerophosphocholine	1		0.121393		0.681272	9.41321e-07	0.08923		0.514045	4.20913e-06	0.174639		0.236406	4.20913e-06	0.0340098
acadesine	13994.3	8848.12	7510.13	6238.18	2626.57		2376.97			3670.35		6340.42	8915.72		8423.01	4847.58	6718.05	3366.32	7974.99			2990.08		3508.63		8715.25	8684.62			6482.2		6953.37		acadesine	1		0.88287		0.928891	0.824128	0.664652		0.708504	0.373584	0.550725		1.11201	0.373584	0.714108
D-glucosamine-6-phosphate	8161.91	4426.07	4499.69			3644.38	5547.83	3039.72	4726.68	3079.06	12701			6057.67	7369.37	4850.05	4149.51	3366.47						4824.36		5238.9				4929.9				D-glucosamine-6-phosphate	1		0.525425		1.3228	0.337171	0.847739		0.841781	0.512039	0.346562		1.04048	0.512039	0.389148
D-glucosamine-1-phosphate	25072.6	24888.4	39061.4	25898.5	14014.2	23236.2	24165.1	18615.2	16203.3	27737.1	16933.2	24786.2	14134	17040.8	18948.2	28119.8	25833	31730.3	17158.5	20487.8	7551.74	36878.6	19575.6	26311.7	38911.9	21086.8	24662.2	24808.6	10112	37250.6	21340.1	24336.3		D-glucosamine-1-phosphate	1		0.416539		0.840735	0.246066	0.336176		0.951658	0.777798	0.466578		1.03876	0.777798	0.486261
thiamine	33448.8	39250.6	63742.2	6224.03	10345.4	49428.2	73883	3417.2	4050.44	16201.5		12134.7	31099.6	4576.95	54058.6	10468.3	5868.62	6170.17		6853.42	9003.69	22005.5	4335.1	229557	16066.3	60914.8	56478.7	2712.82	58602.2	8431.11	118164	127554		thiamine	1		1.08091		0.541688	0.202979	0.659647		1.15942	0.860441	2.54869		1.60479	0.860441	1.82763
S-ribosyl-L-homocysteine-posi	33238.9	21506.9	15467.4	35870.7	23213.2	16863.8	33451.4	18600	14161.5	16026.2	4772.1	13854.5	30665.5	28626.2	21037.7	33440	21579.8	12016.5	22354.3	10266.3	24681.5	22066.7	21113	46033.2	20403	9303.52	27321	6889.46	28569.1	19113.6	25754.8	27286.5		S-ribosyl-L-homocysteine-posi	1		0.467957		0.82025	0.344233	0.48364		0.90868	0.644808	0.530557		0.830629	0.644808	0.437477
deoxyguanosine	16347.5	41472.9	25056.7	6848.22	8816.48		5437.93	3046.64	6077.61	11128.6	5604.44	4688.6	7192.31	3855.65	4205.89	2914.6	40939		3776.39		190046			182865	23506.7	5236.32	81708.9	3238.03	24240.3	52637.2	61097.5	61084		deoxyguanosine	1		1.27619		0.373359	0.0748951	0.376546		6.82866	0.0330914	8.79723		2.5569	0.0330914	2.9844
adenosine	50250	23797.6	9546.48	9263.82	7234.5		4085.16	7429.34		17203.2	11007.1	6606.71	10024.6		7107.91	6613.71	5605.14								6648.57			8583.84				2978.69		adenosine	1		1.45439		0.612183	0.390055	0.679981		0.351555	#DIV/0!	#DIV/0!		0.380734	#DIV/0!	0.430343
1-Methyladenosine														4406.59																				1-Methyladenosine	#DIV/0!		#DIV/0!		#DIV/0!	#DIV/0!	#DIV/0!		#DIV/0!	#DIV/0!	#DIV/0!		#DIV/0!	#DIV/0!	#DIV/0!
guanosine	32069.8	28768.3	31046.2	31717	24533.1	32772	17024.5	26590.4	15544.2	14175.6	13413.5	24770	24519.7	26447.9	14212.7	22089.2	2579.62		4055.74	11241.1	3828.28	12956.5	12877.4	5732.3	17818.7	30831.8	10836.4	15762.3	25799.5	16005.2	11887.3	8466.69		guanosine	1		0.267629		0.691127	0.00658937	0.237568		0.271159	2.45407e-06	0.170711		0.612004	2.45407e-06	0.295853
L-arginino-succinate	351787	418701	353861	305615	392446	371332	350652	242337	392820	316203	339414	329607	325367	376247	332638	336077	103380	85604.9	221729	132951	77293	82251.8	103559	155166	57052	79594.7	100074	88930.1	87661.5	87568.6	60453.5	86393.7		L-arginino-succinate	1		0.219888		0.986235	0.82544	0.171335		0.345184	4.19158e-07	0.150261		0.232433	4.19158e-07	0.0558591
S-methyl-5-thioadenosine	89600.7	41325.6	39881.9	18218.8	10719.2	40889.8	27019.2	45654.9	27366.8	19264	16479.2	49614	36694.1	62967.2	59846.1	66740.4	13363.9	24401.7	27552.7	29587.6	27111.3	25671	52268.4	38379	12548	13164.5	24482	16753.9	10475.3	16798.1	25951.9	33243.5		S-methyl-5-thioadenosine	1		0.862062		1.0819	0.775679	0.836197		0.760702	0.333235	0.547269		0.489665	0.333235	0.360562
7-methylguanosine	2971.19	8330.57	2970.27	4697.93	6213.58	9829.05	3214	4611.27	8800.13	5493.56	6411.29	6336.26	2681.14		4086.12	4232.75	4098.17		4219.98	4509.78	5884.56	3475.93	4116.72	2286.01		9417.32	3044.78		5441.26		4885.52	5000.67		7-methylguanosine	1		0.681038		1.01489	0.948257	0.61484		0.762774	0.248251	0.419383		1.03794	0.248251	0.664487
dCMP	22021.1	22126	39059.9	30466.6	28467.6	27339.3	33253.7	23553.3	18859.5	14177.3		9808.21	31205.2	15203.6	13673.3	23756.5	7235.13		26127.8	12707			7212.89	20612.6	7202.02	2908.87	14304.5	4857.16	3609.38	9518.53	4890.9	8899.18		dCMP	1		0.296409		0.639811	0.0103828	0.289657		0.522488	0.00570329	0.316039		0.248315	0.00570329	0.143783
glutathione	1.80159e+07	1.62446e+07	1.26006e+07	9.47061e+06	1.01045e+07	1.24647e+07	8.77462e+06	6.51738e+06	4.86918e+07	4.3332e+07	7.45069e+07	5.52626e+07	5.09792e+07	5.50283e+07	4.90231e+07	5.40798e+07	9.7515e+06	7.52434e+06	5.76901e+06	8.75787e+06	7.32603e+06	6.4502e+06	4.96238e+06	4.53632e+06	2.64253e+07	3.15449e+07	3.21882e+07	3.94264e+07	2.51081e+07	2.72622e+07	2.61597e+07	3.18335e+07		glutathione	1		0.464812		4.57469	1.07231e-08	1.69644		0.584732	0.00597063	0.246192		2.54741	0.00597063	0.929615
dTMP	149746	159058	132066	86707.1	143386	178413	137496	113771	171955	103772	130860	120629	99490.2	50582.4	105950	113073	30404.2	45155	97448.4	84543.7	84189.4	35881.9	38872.4	72769.6	60421.1	59297.9	82225.5	96864.6	72335.4	65194.6	44557	95334.3		dTMP	1		0.288018		0.814353	0.122915	0.297202		0.444526	6.33999e-05	0.211956		0.52354	6.33999e-05	0.170872
CMP	643680	664453	717075	526431	724020	677834	763486	516416	657481	423485	529420	476121	510508	446857	439683	427365	369740	292314	349763	340147	347732	252163	246823	456950	401216	394053	376494	401148	381792	289769	377839	323196		CMP	1		0.194831		0.747301	0.00155271	0.157911		0.50744	1.27377e-06	0.125936		0.562829	1.27377e-06	0.0990297
UMP	368383	441697	310274	285337	432298	342339	288628	276529	305276	211437	292840	225383	246842	280915	203943	234316	120586	127482	137374	101559	92246	39242.9	137037	109616	178307	135526	169071	172738	149724	156927	138237	165372		UMP	1		0.270357		0.728816	0.00380543	0.178679		0.315115	2.98149e-07	0.111532		0.461085	2.98149e-07	0.0995909
dAMP	114275	124991	115177	106833	107303	96146	99041.6	114732	201160	47168.1	138303	123365	119217	148755	152090	145443	86795.7	75961.6	106191	83080.2	95315.7	69271.6	109207	110934	100282	106449	107789	116053	92620.3	79972.7	100032	101754		dAMP	1		0.121324		1.22425	0.137666	0.407338		0.838653	0.0164527	0.160862		0.916279	0.0164527	0.125862
Nicotinamide ribotide	893519	806888	355164	220771	132613	132992	188615	391920	286871	425235	361430	457269	270185	345455	423184	646262	1.9184e+06	538653	297390	472626	116302	218920	1.67682e+06	217393	1.36225e+06	1.50153e+06	580581	684917	205299	292806	361002	405711		Nicotinamide ribotide	1		1.08703		1.02991	0.919954	0.848348		1.74749	0.299777	2.25132		1.7275	0.299777	1.83287
aminoimidazole carboxamide ribonucleotide		7190.87		5065.95	5255.71	7746.21			6749.94	9245.59		9223.63		5510.51	11054.4		3616.06	2405.17				11954.1	5152.75	9209.2	4432.65	3536.86			6912	5540.17	2667.55	4488.16		aminoimidazole carboxamide ribonucleotide	1		0.303176		1.32339	0.151244	0.450285		1.02419	0.944394	0.670333		0.727864	0.944394	0.283185
thiamine-phosphate	7004.41		4006.86	6237.95	10072.7		7923.53	4938.51		12328.3	9172.52		12818.9	4632.31	7367.48	8726.73		7691.94	8429.63	2948.7	16475.9	6575.17		4826.91	16621.4	8724.78	10727.7	14576.9	15199.3	10067.2	17338.8	16861.3		thiamine-phosphate	1		0.45812		1.36986	0.138096	0.638696		1.16833	0.604168	0.794802		2.05525	0.604168	0.83842
dGMP	8746.4	7745.21	10016.1	11308.6	5740.3		6734.92	4568.59		11105.7			10030.5	4408.6	15730	5550.07	5553.22	2884.65			4707.55		3091.01	52623.8			6638.86	3239.23	4147.14	10562.1	10671.3	12912.9		dGMP	1		0.429109		1.19494	0.463254	0.685365		1.75727	0.481909	2.82566		1.02443	0.481909	0.589899
AMP	6.9401e+06	7.38872e+06	7.43028e+06	6.56954e+06	8.11211e+06	7.94495e+06	5.96622e+06	5.72364e+06	8.98388e+06	5.09799e+06	7.70546e+06	6.07762e+06	7.20476e+06	6.85524e+06	5.55858e+06	5.09686e+06	2.67215e+06	3.1069e+06	1.98422e+06	2.07326e+06	2.04501e+06	1.47148e+06	2.51084e+06	1.67645e+06	4.60639e+06	4.61575e+06	3.49865e+06	4.22527e+06	3.15592e+06	3.70888e+06	3.43249e+06	3.8264e+06		AMP	1		0.176416		0.937671	0.460439	0.228189		0.312798	2.55937e-09	0.08622		0.55407	2.55937e-09	0.104186
IMP	566692	564736	583676	501738	593131	680294	494755	397309	652789	414621	506020	448255	536683	523599	402007	385824	191657	170190	130620	147106	128702	105649	160760	112263	331732	320589	256792	265403	255743	225268	249842	248429		IMP	1		0.216269		0.883045	0.160942	0.211628		0.261721	3.77267e-09	0.067252		0.491473	3.77267e-09	0.101176
S-adenosyl-L-methioninamine						2733.67																												S-adenosyl-L-methioninamine	1		#DIV/0!		#DIV/0!	#DIV/0!	#DIV/0!		#DIV/0!	#DIV/0!	#DIV/0!		#DIV/0!	#DIV/0!	#DIV/0!
GMP	434823	374318	357857	244922	392641	366511	272577	244218	354466	176890	390410	265968	307890	286537	253590	247575	70714.4	104799	66580.6	50894.4	155323	84222	81405	35965	184855	191396	151340	166796	183396	167463	154680	127623		GMP	1		0.30433		0.849493	0.167284	0.269297		0.241791	3.90777e-07	0.120574		0.493903	3.90777e-07	0.123479
xanthosine-5-phosphate	16328	12172.9	4004.95	3898.66			3168.55	2279.44					4458.65												2769.14					2513.87		3477.41		xanthosine-5-phosphate	1		1.17981		0.639195	#DIV/0!	#DIV/0!		#DIV/0!	#DIV/0!	#DIV/0!		0.418634	#DIV/0!	0.356503
riboflavin	75214.5	100619	106154	149160	144530	129845	107354	175729	196421	178177	119957	140610	228195	118058	231058	192422	167251	122111	132690	127485	126156	169929	104049	121492	113568	141880	124692	160325	150642	166002	131594	166302		riboflavin	1		0.369197		1.42109	0.0187762	0.520039		1.08351	0.473357	0.33852		1.16832	0.473357	0.344581
S-adenosyl-L-homoCysteine-posi	29150.6	13882.2	7564.56		56970.2	68966.8	17019.8	9878.65	48661.8	28399.4	142138	47904	65146.4	147482	77904.1	51347.8	4132.21	2409.62	13903.3	5867.3	31389.1	31901.4		32444.1	3324.19	3467.07	16364.8	23736	55755.7	38742.6	35995.3	53066		S-adenosyl-L-homoCysteine-posi	1		1.18814		2.61935	0.0280375	2.68577		0.599939	0.295986	0.697542		0.991214	0.295986	1.091
S-adenosyl-L-methionine	5.18993e+06	4.54012e+06	3.88276e+06	4.16178e+06	3.9986e+06	4.10244e+06	2.78058e+06	3.67934e+06	4.39598e+06	2.65741e+06	4.51625e+06	5.21166e+06	3.68391e+06	4.34064e+06	4.00851e+06	5.85582e+06	1.71433e+06	1.06972e+06	4.28259e+06	1.67311e+06	1.3962e+06	1.16815e+06	1.62508e+06	2.29728e+06	1.65028e+06	1.63758e+06	1.04756e+06	1.62033e+06	824241	842098	899622	1.26209e+06		S-adenosyl-L-methionine	1		0.24146		1.0722	0.496776	0.300042		0.470889	0.000248757	0.268002		0.302571	0.000248757	0.104903
folate	321872	409908	364558	361013	350387	345295	289562	383320	308437	271215	273094	273210	325439	280426	348968	319971	423668	400970	287715	415405	385310	360808	323002	396413	352393	429252	304461	357932	351140	367658	376351	462868		folate	1		0.146825		0.849551	0.00660349	0.121825		1.05923	0.340496	0.173595		1.06233	0.340496	0.178056
7,8-dihydrofolate		2766.5															3585.58				4153.2		3091.2											7,8-dihydrofolate	1		#DIV/0!		#DIV/0!	#DIV/0!	#DIV/0!		1.3049	#DIV/0!	#DIV/0!		#DIV/0!	#DIV/0!	#DIV/0!
5-methyl-THF	35568.4	38171.2	32050.1	26513.9	24964.6	25517.3	16637.5	14437	10843.2	14177.1	21171.4	19596.9	17276.5	7712.07	18948.2	16497.4	14467.1	5778.62	15592.2	14171.7	10589	7974.59	6182.02	14909.5	16068	6978.04		12419.1	4147.05	9554.28	7557.02	11924.4		5-methyl-THF	1		0.444835		0.590212	0.00602613	0.253266		0.419269	0.00034584	0.202391		0.366851	0.00034584	0.188753
Diiodothyronine																																		Diiodothyronine	#DIV/0!		#DIV/0!		#DIV/0!	#DIV/0!	#DIV/0!		#DIV/0!	#DIV/0!	#DIV/0!		#DIV/0!	#DIV/0!	#DIV/0!
glutathione disulfide-posi	4.12997e+06	4.23379e+06	4.70042e+06	3.27134e+06	4.31753e+06	4.70779e+06	4.41562e+06	3.68733e+06	1.05375e+07	8.69813e+06	8.80558e+06	7.55482e+06	8.03684e+06	8.16742e+06	7.25677e+06	7.48058e+06	4.63189e+06	3.53455e+06	3.40479e+06	4.39314e+06	4.88435e+06	3.97271e+06	3.96965e+06	5.33482e+06	7.45711e+06	7.37884e+06	6.60355e+06	5.81563e+06	5.19009e+06	5.70774e+06	5.00483e+06	6.49236e+06		glutathione disulfide-posi	1		0.166491		1.98835	9.02066e-08	0.344444		1.01979	0.782055	0.199826		1.4837	0.782055	0.282768
NAD+_posi	7.38892e+06	9.02124e+06	7.31694e+06	5.20417e+06	6.99725e+06	6.49867e+06	5.98896e+06	5.53108e+06	1.20627e+07	9.05165e+06	1.15379e+07	1.02431e+07	9.66499e+06	1.03689e+07	1.02204e+07	1.02809e+07	4.12519e+06	2.93284e+06	4.71984e+06	4.1877e+06	4.34622e+06	3.1252e+06	3.16661e+06	4.8105e+06	7.39556e+06	6.96943e+06	6.46528e+06	6.35975e+06	6.23557e+06	5.7591e+06	5.33043e+06	7.28115e+06		NAD+_posi	1		0.256443		1.54652	1.01252e-05	0.31466		0.582312	7.02099e-05	0.152992		0.960129	7.02099e-05	0.204282
NADH	131197	131647	321504	269424	319725	401994	324039	161460	506291	396909	424847	283580	425749	441844	381076	319972	102816	176444	132739	173952	231823	156978	74186.9	184616	301390	358874	336123	416235	326801	447643	326277	335229		NADH	1		0.566055		1.54308	0.00680583	0.675249		0.598526	0.0229001	0.30778		1.38214	0.0229001	0.58642
dephospho-CoA-posi					3915.95	2735.28	2772.75	3799.87	3379.28					3855.97	4199.18							1992.93										2454.46		dephospho-CoA-posi	1		0.273468		1.15291	0.289987	0.255371		0.602828	#DIV/0!	#DIV/0!		0.742435	#DIV/0!	#DIV/0!
NADP+_posi	1.01607e+06	1.0013e+06	987967	732034	798389	860440	736666	631738	2.05937e+06	1.43443e+06	1.59706e+06	1.52617e+06	1.40116e+06	1.47058e+06	1.35311e+06	1.45637e+06	603256	432892	710392	588979	386449	455290	485933	598010	1.52737e+06	1.41888e+06	1.26403e+06	1.33045e+06	883362	1.03505e+06	929542	1.19179e+06		NADP+_posi	1		0.241971		1.81803	3.65468e-06	0.408349		0.629926	0.000242111	0.168235		1.41626	0.000242111	0.366075
NADPH	2353.04		8012.17	7398.21	14439.4	21411.5	13866.9	8357.7	4048.31		11996.6	5181.71	13931.2	23134.4	19999.7	12603.9			7165.41	5374.92	4707.67	4999.47	4636.66	4386.17			5106.43	4320.95	2303.06	4528.09	5336.34	6455.81		NADPH	1		0.811526		1.19854	0.554972	0.944392		0.481046	0.0521451	0.291517		0.431517	0.0521451	0.2786
coenzyme A-posi	40546.3	41802	27202.6	26133.9	31096.9	24281.6	15691.9	19533.2	90837	75964.5	154799	103317	59224	79969.6	68600.5	45063	16546.8	24039.2	28141.5	22481.6	20542.1	30899.8	9021.5	10070.9	50131.3	58158	48699.1	101978	41571.8	57539	46675.6	54923.3		coenzyme A-posi	1		0.462094		2.99518	0.000422183	1.53756		0.714767	0.0817535	0.364475		2.03137	0.0817535	0.940633
FAD	45499.7	38709.2	45070.5	39387.4	28906.5	47838.2	47537.8	47105.3	107993	37597.8	57152.3	78341.4	65754.6	72721.7	69478	64963.4	36679.8	32693.5	32025.4	60113.6	51778.4	48839.1	41213.3	47796.6	65375.3	106442	75598.1	134522	36401.1	88017.7	68466.1	86914		FAD	1		0.217635		1.62916	0.00284415	0.531252		1.0326	0.746614	0.282566		1.94597	0.746614	0.750629
acetyl-CoA-posi	30778	22433.2	23136.4	18103.1	16295.2	26465.4	22650.2	26437.4	19846.5	8875.69	16088.5	16599.9	6348.57	10749.3	5684.69	4945.07	17629.5	19050.4	9829.29	17166.3	15881.9	20581.9	12055.2	6693.42	15291.5	12836.2	7917.3	11156.4	6635.3	3616.14	5620.36	4726.25		acetyl-CoA-posi	1		0.283971		0.478469	0.000364438	0.26247		0.638156	0.00326378	0.244284		0.363928	0.00326378	0.193716
propionyl-CoA-posi	9326.08	33741.6	15524.3	19496	13576.9	32352.6	26541.9	26592.7					2222.65	6097.53	3657.3	10663.6	52167.6	101928	48460	111930	195943	90202.3	97371.1	95160.9	57063.8	61066.8	59789.2	95019.2	59442	57844.8	63131.2	3024.51		propionyl-CoA-posi	1		0.574465		0.255611	0.00618716	0.196693		4.4773	0.000336299	2.73999		2.57621	0.000336299	1.54433
acetoacetyl-CoA-posi							3565.42	3006										15865.5		10756.6			6182.13	12717.8			12260.2	11876.5			12893.4			acetoacetyl-CoA-posi	1		0.170257		#DIV/0!	#DIV/0!	#DIV/0!		3.46363	0.0565197	1.30252		3.75668	0.0565197	0.478508
malonyl-CoA-posi					1747.24			2306.87									3659.12	4807.31	2085.51	6842.64	5295.39	5980.22	5667.58	3508.7		3488.1		2139.34			2679.17	1985.94		malonyl-CoA-posi	1		0.276083		#DIV/0!	#DIV/0!	#DIV/0!		2.33383	0.0470635	0.890985		1.2694	0.0470635	0.416502
succinyl-CoA-posi				2728.87	1753.94	1827.39	3049.03	6078.86	2699.53	3082.36	3524.59	3457.92					12398	12025.2	14274.1	8296.39	18116.8	19302.9	6072.41	15786.1	3320.97	4653.72	7381.87	8167.35	9200.81	9052.09	9783.79	7457.54		succinyl-CoA-posi	1		0.807888		1.03352	0.912652	0.603178		4.30234	0.000638195	2.86873		2.38931	0.000638195	1.55204
sarcosine	476414	552902	581136	572277	650324	597951	576801	750998	443367	393160	371164	372836	471941	542951	538038	531038	743680	637446	776951	728085	732676	768611	784063	903551	571234	645072	632044	596392	759791	765199	746254	1.03551e+06		sarcosine	1		0.189085		0.770046	0.00313331	0.16152		1.27659	0.000767007	0.21146		1.2086	0.000767007	0.297549
putrescine	25094.8	24808.2	11793.4	32405.7	24277.2	25957.9	39436.5	17433.7	67146.1	44913.7	66931.5	20409.6	28165.5	24279.6	14865.2	7683.17	57069.2	30466.5	14784.4	2762.49	14395	3520.61	26352.1	29939.7	34702.9	25574.1	35337.1	30053.1	24354.2	16087.4	38797.9	43221		putrescine	1		0.473424		1.36374	0.307006	1.01883		0.89107	0.699105	0.765924		1.23319	0.699105	0.540628
spermidine	182837	249221	228711	180528	177916	210492	223381	189846	92988.8	110730	11604.7	158361	106908	187887	170878	186252	21985.4	356669	281614	351639	377680	333937	304218	473653	288731	245416	273579	283034	285848	324838	295755	402977		spermidine	1		0.182897		0.624255	0.00502509	0.303425		1.52252	0.0391126	0.666199		1.46091	0.0391126	0.297164
spermine	2899.3					2761.89		3799.82								1926.8			2107.28					3069.04				7986.32						spermine	1		0.252819		0.610972	#DIV/0!	#DIV/0!		0.820681	0.381239	0.260818		2.53239	0.381239	#DIV/0!
dephospho-coA-posi1					3915.95	2735.28	2772.75	3799.87	3379.28				2788.1	3855.97	4199.18						2362.77	1992.93										2454.46		dephospho-coA-posi1	1		0.273468		1.07552	0.593118	0.27848		0.658764	0.0838667	0.149949		0.742435	0.0838667	#DIV/0!
coenzyme A-posi1	40546.3	41802	27202.6	26133.9	31096.9	24281.6	15691.9	19533.2	90837	75964.5	154799	103317	59224	79969.6	68600.5	45063	16546.8	24039.2	28141.5	22481.6	20542.1	30899.8	9021.5	10070.9	50131.3	58158	48699.1	101978	41571.8	57539	46675.6	54923.3		coenzyme A-posi1	1		0.462094		2.99518	0.000422183	1.53756		0.714767	0.0817535	0.364475		2.03137	0.0817535	0.940633
creatine	3.90075e+07	3.87846e+07	3.7681e+07	3.40251e+07	3.35363e+07	3.5658e+07	3.37048e+07	3.25669e+07	3.79831e+07	3.93403e+07	3.7281e+07	3.95309e+07	4.1448e+07	3.61791e+07	4.5741e+07	4.23945e+07	3.57529e+07	3.69815e+07	3.30418e+07	3.43908e+07	3.62372e+07	3.35018e+07	3.58914e+07	3.70278e+07	3.95432e+07	3.85211e+07	3.70533e+07	3.47908e+07	3.36987e+07	3.56426e+07	3.65202e+07	3.97586e+07		creatine	1		0.101348		1.12259	0.0082731	0.118627		0.992493	0.803092	0.0830872		1.03707	0.803092	0.0968313
N-acetyl spermine	66050.8	118206	113303	99792.1	87056.8	76663.3	90988.1	65745.4	8781.69	19844	3654.5	46071.6	57395.7	79141.5	88421.3	67699.2	105514	112026	77496.5	105594	103182	102507	59169.8	100634	111525	128556	11907.1	83368.3	109303	133700	103665	114243		N-acetyl spermine	1		0.314287		0.516866	0.00615799	0.379203		1.06731	0.534485	0.310232		1.10931	0.534485	0.495693
N-acetyl spermidine	9867.74	8994.06	5553.85	9317.88	13644.2	1821.52	9860.01	8359.9		6780.54	2741.04	8149.97	8933.11	2139.23	13612.7	5779.46		4791.01	3316.4	4398.55				5632.48	6629	6398.83	12549.3	4381.09	6883.69	6035.56	5779.19			N-acetyl spermidine	1		0.582546		0.815979	0.430529	0.573443		0.53808	0.0567202	0.249289		0.824804	0.0567202	0.458954
N1-Methyl-2_2-pyridone-3_5-carboximide	113654	147935	171725	179162	26810	23149.4	181990	159552	203488	202871	108285	164284	204174	156471	221245	40443.7	174194	181705	29203.9	153833	113658	176029	157033	280057	145957	32950.9	101497	127461	156448	188930	217560	266985		N1-Methyl-2_2-pyridone-3_5-carboximide	1		0.740496		1.29611	0.261972	0.836539		1.2607	0.35264	0.865893		1.23289	0.35264	0.863218
N1-Methyl-2_4-pyridone-3_5-carboximide																																		N1-Methyl-2_4-pyridone-3_5-carboximide	#DIV/0!		#DIV/0!		#DIV/0!	#DIV/0!	#DIV/0!		#DIV/0!	#DIV/0!	#DIV/0!		#DIV/0!	#DIV/0!	#DIV/0!
Nicotinamide Riboside		15412	3801.6			8201.92		6402.53			5644.28	9798.74	5015.43		4181.17	16945.7			10963.8	3249.32		3982.57		6548.74	3877.84		3064.52			4239.55		7440.78		Nicotinamide Riboside	1		0.832623		0.983742	0.969413	0.852333		0.731692	0.483505	0.596238		0.550673	0.483505	0.395881
Adenylosuccinate	261229	277698	294567	243682	339435	350856	339109	242768	244374	189847	235681	256495	206737	305773	269483	244828	205629	182209	237247	190602	185344	182895	194737	232416	258734	353632	328443	383302	329001	411421	391680	419658		Adenylosuccinate	1		0.214034		0.831388	0.0279447	0.175388		0.685757	0.000120126	0.12804		1.22412	0.000120126	0.259715
cholesterol	4.8062e+06	3.39785e+06	2.11356e+06	2.12761e+06	1.47021e+06	1.28206e+06	1.71279e+06	1.63171e+06	4.62655e+06	3.53103e+06	1.50391e+06	2.83098e+06	1.19087e+06	1.30237e+06	1.71394e+06	2.52885e+06	3.4581e+06	3.96605e+06	1.96284e+06	2.23841e+06	1.62052e+06	1.58629e+06	2.78655e+06	1.02187e+06	3.20037e+06	4.17459e+06	1.94519e+06	3.0028e+06	1.13999e+06	1.5768e+06	1.31351e+06	2.08458e+06		cholesterol	1		0.731636		1.03702	0.889084	0.750901		1.00532	0.982531	0.677109		0.994383	0.982531	0.687707
arginosuccinic acid	296817	252792	248294	285011	271655	288456	244011	212556	284789	260657	255435	247374	298126	222636	258517	300195	67614.9	44712.7	177675	72726.9	71194.9	55934.4	58173.2	125391	67568.8	48567.2	65324	73419.6	64051.4	50718.3	44902.4	57083.9		arginosuccinic acid	1		0.152059		1.0134	0.801512	0.148987		0.32074	1.70281e-07	0.174127		0.224632	1.70281e-07	0.0457221
phosphocreatine	222709	260689	255351	286017	216912	291717	247711	261029	229469	153368	215907	182122	215092	243489	249300	255501	249726	194854	367935	306929	240936	215312	251016	334160	140620	182661	186455	183017	156215	180090	171704	209706		phosphocreatine	1		0.146951		0.85413	0.0313419	0.163796		1.05814	0.533405	0.260022		0.690683	0.533405	0.108463
Pantetheine-4-phosphate-posi																																		Pantetheine-4-phosphate-posi	#DIV/0!		#DIV/0!		#DIV/0!	#DIV/0!	#DIV/0!		#DIV/0!	#DIV/0!	#DIV/0!		#DIV/0!	#DIV/0!	#DIV/0!
Pantetheine-4-phosphate-posi_C13N15																																		Pantetheine-4-phosphate-posi_C13N15	#DIV/0!		#DIV/0!		#DIV/0!	#DIV/0!	#DIV/0!		#DIV/0!	#DIV/0!	#DIV/0!		#DIV/0!	#DIV/0!	#DIV/0!
dephospho-coA-posi1_C13N15																																		dephospho-coA-posi1_C13N15	#DIV/0!		#DIV/0!		#DIV/0!	#DIV/0!	#DIV/0!		#DIV/0!	#DIV/0!	#DIV/0!		#DIV/0!	#DIV/0!	#DIV/0!
dephospho-coA-posi2																																		dephospho-coA-posi2	#DIV/0!		#DIV/0!		#DIV/0!	#DIV/0!	#DIV/0!		#DIV/0!	#DIV/0!	#DIV/0!		#DIV/0!	#DIV/0!	#DIV/0!
dephospho-coA-posi2_C13N15																																		dephospho-coA-posi2_C13N15	#DIV/0!		#DIV/0!		#DIV/0!	#DIV/0!	#DIV/0!		#DIV/0!	#DIV/0!	#DIV/0!		#DIV/0!	#DIV/0!	#DIV/0!
coenzyme A-posi1_C13N15																																		coenzyme A-posi1_C13N15	#DIV/0!		#DIV/0!		#DIV/0!	#DIV/0!	#DIV/0!		#DIV/0!	#DIV/0!	#DIV/0!		#DIV/0!	#DIV/0!	#DIV/0!
coenzyme A-posi2_C13N15																																		coenzyme A-posi2_C13N15	#DIV/0!		#DIV/0!		#DIV/0!	#DIV/0!	#DIV/0!		#DIV/0!	#DIV/0!	#DIV/0!		#DIV/0!	#DIV/0!	#DIV/0!
NAD/NADH_posi	56.3192	68.526	22.7585	19.3159	21.8852	16.1661	18.4822	34.2567	23.8257	22.8053	27.1578	36.1205	22.7011	23.4673	26.8198	32.1306	40.122	16.6219	35.5573	24.0739	18.748	19.9085	42.6843	26.0567	24.5382	19.4202	19.2349	15.2792	19.0806	12.8654	16.3371	21.7199		NAD/NADH_posi	1		0.864165		0.834381	0.469236	0.532062		0.868313	0.596405	0.616895		0.576135	0.596405	0.37022
NAD/NADH_neg	24.0866	25.4143	10.2012	7.63797	11.5108	7.45245	8.90112	22.5815	7.61909	10.0439	10.6405	13.6263	9.38799	10.3973	11.883	18.4005	17.8775	8.00285	17.2066	8.21185	6.05398	6.01492	17.3256	11.5076	12.4934	6.46067	7.66295	6.71977	6.69756	7.95654	9.16309	10.4065		NAD/NADH_neg	1		0.754102		0.781066	0.302315	0.472726		0.782783	0.353311	0.547185		0.573587	0.353311	0.33816
NADP/NADPH_posi			123.308	98.9475	55.2924	40.1858	53.1242	75.5875			133.126	294.531	100.577	63.5668	67.6567	115.549			99.1418	109.579	82.0894	91.0675	104.802	136.34			247.538	307.907	383.56	228.583	174.191	184.607		NADP/NADPH_posi	1		0.600092		1.73595	0.171392	1.36357		1.39551	0.0778595	0.64328		3.41897	0.0778595	1.80137
NADP/NADPH_neg		71.739	79.4105	73.3867	31.097		13.8323	100.109		109.762	52.7862	99.2653	110.27	44.0742	51.3378	109.093		86.1115	23.2238	74.9528	11.0268	#VALUE!	65.0664			163.794	210.587	220.072	30.0607		144.262	#VALUE!		NADP/NADPH_neg	1		0.744264		1.33727	0.264363	0.866908		#VALUE!	#VALUE!	#VALUE!		#VALUE!	#VALUE!	#VALUE!
GSH/GSSG_posi	4.36224	3.83689	2.68073	2.89502	2.34035	2.64768	1.98718	1.76751	4.62081	4.98176	8.46132	7.31488	6.34319	6.73754	6.75551	7.22936	2.1053	2.1288	1.69438	1.99353	1.4999	1.62363	1.25008	0.850324	3.54363	4.27505	4.87438	6.77939	4.8377	4.77636	5.22688	4.90322		GSH/GSSG_posi	1		0.445302		2.32904	7.42084e-06	0.858008		0.583807	0.00483254	0.242187		1.7416	0.00483254	0.637902
GSH/GSSG_neg	1.57595	1.13961	0.949021	0.72542	0.735033	0.726834	0.611503	0.598265	1.49036	1.93436	2.2703	2.36202	2.04058	2.32252	1.94768	2.2676	0.833551	0.791757	0.520164	0.569951	0.471166	0.47805	0.41042	0.366118	1.18074	1.5075	1.47153	1.51803	1.50693	1.50534	1.35806	1.42402		GSH/GSSG_neg	1		0.533533		2.35575	2.33053e-06	0.948391		0.628916	0.0267271	0.306285		1.62457	0.0267271	0.626839

## Sheet: HCC364 Significant Changes
Sample Type	sgKEAP1_no drug/sgCTRL_no drug	t test		Sample Type	sgCTRL_Tram/sgCTRL_No drug	t test		Sample Type	sgKEAP1_Tram/sgCTRL_no drug	t test		Sample Type	sgKEAP1_Tram/sgCTRL_Tram	t test		Sample Type	sgKEAP1_Tram/sgKEAP1_No drug	t test
glutathione-nega	4.595	4.01877e-10		propionyl-CoA-posi	4.4773	0.000336299		propionyl-CoA-posi	2.57621	0.000336299		glutathione	4.35654	3.89669e-09		deoxyguanosine	6.84836	0.00581213
glutathione	4.57469	1.07231e-08		2,3-Diphosphoglyceric acid	2.90452	0.0358455		glutathione	2.54741	0.00597063		glutathione-nega	3.82052	2.93304e-09		5-phosphoribosyl-1-pyrophosphate	4.43253	1.1834e-07
S-adenosyl-L-homocysteine-nega	3.17125	0.015656		methylnicotinamide	2.59927	0.0128261		UDP-D-glucuronate	2.53436	6.32163e-05		UDP-D-glucuronate	2.98856	2.72218e-09		methylnicotinamide	2.83891	0.000261721
coenzyme A-posi	2.99518	0.000422183		Cystine	2.00146	0.000385629		sn-glycerol-3-phosphate	2.47478	0.000541424		GSH/GSSG_posi	2.98317	3.18642e-07		Pyrophosphate	2.81979	7.22889e-07
coenzyme A-posi1	2.99518	0.000422183		shikimate	1.80303	6.38939e-07		shikimate	2.13097	6.38939e-07		cysteine	2.92594	2.00212e-07		spermidine	2.34025	1.74937e-05
UDP-D-glucuronate	2.83853	6.7729e-10		Pyrophosphate	1.63602	0.000782538		2,3-Diphosphoglyceric acid	1.88245	0.0358455		coenzyme A-posi	2.84201	0.000147042		glycine	2.14674	2.30283e-05
coenzyme A-nega	2.51449	0.00854019		spermidine	1.52252	0.0391126		GSH/GSSG_posi	1.7416	0.00483254		coenzyme A-posi1	2.84201	0.000147042		N-acetyl spermine	2.14622	0.00987701
GSH/GSSG_neg	2.35575	2.33053e-06		N-acetyl-glucosamine	1.5199	0.00512159		glutathione disulfide-nega	1.73257	0.0205619		GSH/GSSG_neg	2.58313	9.0601e-09		cytidine	2.1178	0.00746677
GSH/GSSG_posi	2.32904	7.42084e-06		hypoxanthine	1.51733	6.2977e-05		GSH/GSSG_neg	1.62457	0.0267271		NADP/NADPH_posi	2.44998	0.00111128		sn-glycerol-3-phosphate	2.03152	7.27338e-08
O-acetyl-L-serine	1.99231	0.0355531		trehalose-sucrose	1.49734	0.000223675		hypoxanthine	1.60582	6.2977e-05		NADH	2.30924	1.21299e-06		Cystine	2.01311	0.000195447
glutathione disulfide-posi	1.98835	9.02066e-08		p-hydroxybenzoate	1.44602	0.0107949		trehalose-sucrose	1.60003	0.000223675		NADP+_posi	2.2483	3.7127e-06		Kynurenine	2.01035	0.00367498
glutathione disulfide-nega	1.92226	2.70184e-07		aconitate	1.42763	0.00467122		Pyrophosphate	1.58426	0.000782538		NADP+_nega	2.20092	4.04243e-06		succinate	1.99387	1.99147e-06
3-methylphenylacetic acid	1.9078	0.00418387		histidine	1.42284	2.24569e-07		citrulline	1.48496	9.64149e-06		GMP	2.04269	5.71924e-05		Methylmalonic acid	1.99272	3.16532e-06
NADP+_posi	1.81803	3.65468e-06		methionine	1.41102	6.41608e-05		succinate	1.4715	0.000101221		NADH-nega	2.03769	2.10793e-05		NADP/NADPH_posi	1.96952	0.0251585
adenosine 5-phosphosulfate	1.80981	0.00309919		citrulline	1.40747	9.64149e-06		NADP+_nega	1.47005	0.00271571		sn-glycerol-3-phosphate	1.88608	2.16205e-07		cysteine	1.9341	7.27146e-06
IDP-nega	1.79728	0.00131157		ornithine	1.39927	0.00241148		spermidine	1.46091	0.0391126		FAD	1.88454	0.00317489		trehalose-sucrose	1.88384	2.49974e-05
ADP-nega	1.76249	0.00127275		1-Methyl-Histidine	1.39295	6.29092e-05		1-Methyl-Histidine	1.45202	6.29092e-05		IMP	1.87785	2.88189e-06		methionine	1.85322	4.22256e-06
dGDP-nega	1.76249	0.00127275		N-Acetyl-L-alanine	1.37877	0.000173836		Phenylpropiolic acid	1.42599	2.22371e-06		coenzyme A-nega	1.8574	0.0247412		citrulline	1.8279	4.47309e-07
NADP+_nega	1.75407	2.3259e-06		tryptophan	1.37836	0.00774595		methionine	1.41672	6.41608e-05		Adenylosuccinate	1.78506	2.02199e-06		shikimate	1.78294	9.15917e-07
UDP-nega	1.74317	0.00103582		a-ketoglutarate	1.37342	3.07363e-06		NADP+_posi	1.41626	0.000242111		AMP	1.77134	2.19041e-05		allantoin	1.7429	0.000198154
NADH-nega	1.68566	0.0028996		Phenylpropiolic acid	1.37109	2.22371e-06		histidine	1.41448	2.24569e-07		orotidine-5-phosphate	1.74823	0.00890499		N-carbamoyl-L-aspartate	1.73566	0.0164203
FAD	1.62916	0.00284415		leucine-isoleucine	1.36681	0.000500008		a-ketoglutarate	1.41134	3.07363e-06		5-phosphoribosyl-1-pyrophosphate	1.68558	0.00743468		valine	1.73265	2.15815e-06
NAD+_nega	1.55019	1.32273e-07		Acetylcarnitine DL	1.36317	0.021869		serine	1.38805	4.47166e-07		NAD+_nega	1.64931	0.000261196		p-hydroxybenzoate	1.72765	0.00191878
NAD+_posi	1.54652	1.01252e-05		succinate	1.35798	0.000101221		NADH	1.38214	0.0229001		NAD+_posi	1.64882	6.81856e-06		serine	1.68998	2.18257e-08
SBP	1.54362	0.0129851		serine	1.3514	4.47166e-07		N-Acetyl-L-alanine	1.37904	0.000173836		thymine	1.46973	0.00257343		leucine-isoleucine	1.67896	2.49292e-05
NADH	1.54308	0.00680583		isocitrate	1.34263	0.0115575		leucine-isoleucine	1.37423	0.000500008		UMP	1.46323	0.00146926		2-dehydro-D-gluconate	1.63093	0.00121639
4-Pyridoxic acid	1.47046	0.0246298		lysine	1.3211	7.89364e-05		p-hydroxybenzoate	1.37096	0.0107949		glutathione disulfide-posi	1.45491	0.000286632		1-Methyl-Histidine	1.62756	1.84205e-05
UDP-N-acetyl-glucosamine	1.46327	6.02613e-06		sn-glycerol-3-phosphate	1.31213	0.000541424		Pyroglutamic acid	1.34669	0.000749857		glutathione disulfide-nega	1.4486	6.44666e-05		allantoate	1.6253	0.000100425
riboflavin	1.42109	0.0187762		allantoate	1.2942	0.000795589		ornithine	1.3194	0.00241148		GDP-nega	1.44384	0.0352869		Ascorbic acid	1.5975	0.0162355
Aminoadipic acid	1.36395	5.96059e-05		threonine	1.29356	2.7047e-07		cytosine	1.31738	5.2416e-06		SBP	1.42186	0.00182097		histidine	1.57905	1.58578e-07
Indole-3-carboxylic acid	1.35006	0.000414867		tyrosine	1.28707	2.41643e-05		Aminoadipic acid	1.28909	0.0480918		glucose-6-phosphate	1.41178	0.000166261		sarcosine	1.56952	0.00055579
dCDP-nega	1.32527	0.0471151		cytosine	1.28316	5.2416e-06		Imidazoleacetic acid	1.28456	0.000535852		UDP-N-acetyl-glucosamine	1.33275	0.00132625		asparagine	1.52237	4.81009e-07
Thiamine pyrophosphate	1.31705	0.0122852		sarcosine	1.27659	0.000767007		tyrosine	1.28327	2.41643e-05		D-glyceraldehdye-3-phosphate	1.29786	0.00221909		phenylalanine	1.51879	0.0324769
biotin	1.30112	0.0148176		aspartate	1.2662	0.000839126		glutamine	1.27543	3.44652e-05		taurine	1.27242	1.41286e-06		2-Aminooctanoic acid	1.5168	0.0278964
dCTP-nega	1.29104	0.033802		Imidazoleacetic acid	1.25984	0.000535852		lysine	1.27489	7.89364e-05		fructose-1,6-bisphosphate	1.26588	0.0183838		tyrosine	1.51136	3.2597e-05
dTDP-nega	1.27758	0.0178689		asparagine	1.25711	7.05842e-07		valine	1.26653	0.0175269		homocysteine	1.24751	0.0429845		N-Acetyl-L-alanine	1.50417	2.52825e-06
fructose-6-phosphate	1.27304	0.0122115		glutamine	1.25077	3.44652e-05		threonine	1.26577	2.7047e-07		dihydroxy-acetone-phosphate	1.23716	0.0157491		N-carbamoyl-L-aspartate-nega	1.4943	0.00290498
taurine	1.27099	4.93631e-05		N6-Acetyl-L-lysine	1.25025	0.0494206		hydroxyproline	1.25998	8.03223e-06		3-phosphoglycerate	1.2103	0.0449913		tryptophan	1.484	0.00300383
indole	1.26794	0.0297124		N-carbamoyl-L-aspartate-nega	1.24855	0.0103213		Uric acid	1.25141	0.0309843		cystathionine	1.18885	0.0393434		a-ketoglutarate	1.48053	8.5806e-06
Acetylcarnitine DL	1.2399	0.0229072		valine	1.24794	0.0175269		asparagine	1.24688	7.05842e-07		shikimate	1.18188	0.00904863		threonine	1.47979	6.33713e-06
sn-glycerol-3-phosphate	1.21819	0.00609167		acetylphosphate	1.24495	0.0382465		tryptophan	1.24602	0.00774595		ribose-phosphate	1.16755	0.0410288		Pyroglutamic acid	1.4764	1.87155e-05
citrate-isocitrate	1.20235	0.0122164		Pyroglutamic acid	1.2331	0.000749857		aconitate	1.24117	0.00467122		D-sedoheptulose-1-7-phosphate	1.15782	0.025567		ornithine	1.47356	0.000130319
citrate	1.16303	0.0366893		Urea	1.22919	0.00201786		methylnicotinamide	1.23683	0.0128261		Aminoadipic acid	1.12823	0.0355562		Adenylosuccinate	1.47238	0.000171828
betaine	1.12295	0.0226203		Methionine sulfoxide	1.19659	0.017001		Adenylosuccinate	1.22412	0.000120126		proline	0.934936	0.0195321		hypoxanthine	1.46586	4.52002e-05
creatine	1.12259	0.0082731		glutathione disulfide-nega	1.19604	0.0205619		isocitrate	1.21497	0.0115575		N-carbamoyl-L-aspartate-nega	0.843157	0.0424035		Methionine sulfoxide	1.44928	0.00191051
adenine	1.10675	0.0299854		hydroxyproline	1.19449	8.03223e-06		Methionine sulfoxide	1.21091	0.017001		2-Isopropylmalic acid	0.806954	0.00364938		cytosine	1.4456	0.000124929
glutamine	0.922478	0.0255111		Carbamoyl phosphate	1.18991	0.0355032		sarcosine	1.2086	0.000767007		glutamate	0.806331	0.000161287		Phenylpropiolic acid	1.4436	3.02971e-06
proline	0.896213	0.0444943		arginine	1.15442	0.000101796		N-acetyl-glucosamine	1.20007	0.00512159		DL-Pipecolic acid	0.805903	0.0131397		aspartate	1.41514	0.000448524
threonine	0.855371	0.0128254		Aminoadipic acid	1.14258	0.0480918		Methylcysteine	1.18898	0.00374917		dimethylglycine	0.801947	0.0408156		lactate	1.39378	0.00223794
phosphocreatine	0.85413	0.0313419		Methylcysteine	1.13959	0.00374917		Acetylcarnitine DL	1.18591	0.021869		N6-Acetyl-L-lysine	0.723786	0.0262646		deoxyribose-phosphate	1.38923	0.045161
2-ketohaxanoic acid	0.852282	0.0377915		Uric acid	1.13765	0.0309843		arginine	1.17246	0.000101796		aspartate	0.712016	3.26265e-05		hydroxyproline	1.38678	3.09018e-06
myo-inositol	0.850959	0.000911961		alanine	1.12619	0.000733603		alanine	1.16405	0.000733603		L-arginino-succinate	0.67336	0.0473197		glutamine	1.38261	5.09869e-08
folate	0.849551	0.00660349		UDP-D-glucuronate	0.84802	6.32163e-05		allantoate	1.14597	0.000795589		2-keto-isovalerate	0.672953	0.0134805		isocitrate	1.36552	0.0372319
Adenylosuccinate	0.831388	0.0279447		dAMP	0.838653	0.0164527		Urea	1.13983	0.00201786		fumarate	0.66598	0.00981666		lysine	1.36372	0.000590307
glutamate	0.8289	0.000377511		taurine	0.801544	0.000254042		acetylphosphate	1.12244	0.0382465		NAD/NADH_posi	0.663511	0.0271086		dUMP-nega	1.36041	0.0224466
serine	0.821342	0.000897324		hexose-phosphate	0.783255	0.00519731		N-carbamoyl-L-aspartate-nega	1.05272	0.0103213		6-phospho-D-gluconate	0.661012	0.00125945		Uric acid	1.31163	0.000497599
asparagine	0.81904	0.000257542		UTP-nega	0.769939	0.0426063		taurine	1.0199	0.000254042		phosphocreatine	0.652732	0.000944998		2-hydroxygluterate	1.30523	0.0229535
citrulline	0.812386	0.0341376		ribose-phosphate	0.741877	3.09834e-05		NAD+_nega	1.00379	0.000202921		S-methyl-5-thioadenosine	0.643702	0.0481645		Imidazoleacetic acid	1.2939	0.000436868
sarcosine	0.770046	0.00313331		glucose-1-phosphate	0.73438	0.0435797		thymine	0.962957	0.00973738		Maleic acid	0.628136	0.00444414		Urea	1.26449	0.0179876
Phosphorylcholine	0.76535	0.00605505		6-phospho-D-gluconate	0.71977	0.0219524		NAD+_posi	0.960129	7.02099e-05		glyoxylate	0.610871	0.0407228		folate	1.25046	0.00242512
methionine	0.764464	0.0155975		UDP-D-glucose	0.703498	0.000336012		dAMP	0.916279	0.0164527		malate	0.610769	0.00946925		pyridoxine	1.24561	0.014966
2-Isopropylmalic acid	0.761766	0.00100874		2-keto-isovalerate	0.698329	0.00444105		glucose-6-phosphate	0.915585	0.000171706		D-glucono-?-lactone-6-phosphate	0.604997	0.00249577		alanine	1.23648	0.000429161
CMP	0.747301	0.00155271		4-aminobutyrate	0.697207	0.00646301		N6-Acetyl-L-lysine	0.904917	0.0494206		propionyl-CoA-posi	0.575395	0.0377096		Methylcysteine	1.17473	0.00754191
succinate	0.738015	0.00632866		N-acetyl-glutamine	0.69246	0.0200068		aspartate	0.901554	0.000839126		acetyl-CoA-posi	0.570281	0.0135277		arginine	1.15458	0.0144155
lactate	0.733788	0.0347178		Maleic acid	0.690663	0.00204392		D-glyceraldehdye-3-phosphate	0.882339	0.00011034		succinyl-CoA-posi	0.55535	0.00556422		myo-inositol	1.12525	0.00653205
valine	0.730975	0.0118013		D-sedoheptulose-1-7-phosphate	0.687497	9.02097e-05		ribose-phosphate	0.866179	3.09834e-05		Phosphorylcholine	0.529015	0.00485746		creatine	0.923821	0.0402736
UMP	0.728816	0.00380543		Adenylosuccinate	0.685757	0.000120126		dihydroxy-acetone-phosphate	0.840739	8.75774e-05		ethanolamine	0.526166	0.0133597		glutamate	0.912431	0.0316315
Methylmalonic acid	0.712051	0.00211974		D-glyceraldehdye-3-phosphate	0.679841	0.00011034		Cystine	0.830959	0.000385629		CDP-ethanolamine	0.491019	0.0168185		ribose-phosphate	0.84036	0.0296787
allantoate	0.705082	0.000724369		dihydroxy-acetone-phosphate	0.679573	8.75774e-05		hexose-phosphate	0.821723	0.00519731		4-aminobutyrate	0.480221	0.00041955		NADP+_nega	0.838078	0.0284818
N-carbamoyl-L-aspartate-nega	0.704494	0.00688307		NADP+_nega	0.667925	0.00271571		fructose-1,6-bisphosphate	0.80238	0.00591903		methylnicotinamide	0.475837	0.0288034		UDP-N-acetyl-glucosamine	0.829437	0.0112855
2-keto-isovalerate	0.694951	5.04245e-05		cystathionine	0.667549	6.54643e-06		GDP-nega	0.800145	0.0336324		Glycerophosphocholine	0.459895	0.000422071		dihydroxy-acetone-phosphate	0.828547	0.0187896
2-dehydro-D-gluconate	0.69427	0.00176533		fumarate	0.664765	0.0013967		D-sedoheptulose-1-7-phosphate	0.795998	9.02097e-05		Cystine	0.415176	2.68014e-06		glucose-6-phosphate	0.823171	0.0117653
guanosine	0.691127	0.00658937		CDP-nega	0.660206	0.000376457		cystathionine	0.793617	6.54643e-06		dTMP-nega	0.308407	0.0188235		phosphocreatine	0.80864	0.0118439
Glycerophosphocholine	0.681272	9.41321e-07		malate	0.655244	0.00302433		SBP	0.772648	0.000383385		glucosamine	0.225205	0.0207884		taurine	0.802449	6.41084e-06
fumarate	0.678212	7.04793e-06		thymine	0.655194	0.00973738		glucose-1-phosphate	0.768573	0.0435797		Carbamoyl phosphate	0.146037	1.29323e-09		thymine	0.780613	0.0145697
Maleic acid	0.657606	4.80786e-07		glucose-6-phosphate	0.648532	0.000171706		guanine	0.703976	0.000277801						NADP+_posi	0.779011	0.00991092
6-phospho-D-gluconate	0.641085	0.00410324		acetyl-CoA-posi	0.638156	0.00326378		IDP-nega	0.681047	0.000141528						Kynurenic acid	0.774971	0.00321267
aspartate	0.637076	3.14197e-05		fructose-1,6-bisphosphate	0.633851	0.00591903		Kynurenic acid	0.677658	2.73633e-05						guanine	0.757395	0.0439465
CDP-choline	0.634745	0.0137405		NADP+_posi	0.629926	0.000242111		S-ribosyl-L-homocysteine-nega	0.673684	0.0178351						CMP	0.753149	0.00168292
spermidine	0.624255	0.00502509		GSH/GSSG_neg	0.628916	0.0267271		UDP-D-glucose	0.670317	0.000336012						dimethylglycine	0.752058	0.0157132
D-glucono-?-lactone-6-phosphate	0.620382	0.0243325		Kynurenic acid	0.620786	2.73633e-05		3-phosphoglycerate	0.669794	4.53683e-05						dAMP	0.748443	0.0497662
malate	0.61156	8.05381e-06		NAD+_nega	0.608608	0.000202921		ADP-nega	0.659846	8.42021e-05						GSH/GSSG_posi	0.747775	0.00934974
2-hydroxygluterate	0.60074	7.7901e-05		dihydroorotate	0.60702	0.0201042		dGDP-nega	0.659846	8.42021e-05						glutathione disulfide-posi	0.746196	0.000822982
5-methyl-THF	0.590212	0.00602613		Phosphorylcholine	0.598877	0.00103937		dihydroorotate	0.644999	0.0201042						D-sedoheptulose-1-7-phosphate	0.742868	2.57765e-05
Pyrophosphate	0.561836	4.34644e-05		NADH	0.598526	0.0229001		UTP-nega	0.642229	0.0426063						6-phospho-D-gluconate	0.742143	0.00773728
glycine	0.557618	0.000445049		adenosine 5-phosphosulfate	0.594285	0.0222105		dephospho-CoA-nega	0.630245	0.000605711						NAD/NADH_neg	0.734364	0.044656
5-phosphoribosyl-1-pyrophosphate	0.517643	0.00613501		glutathione	0.584732	0.00597063		adenosine 5-phosphosulfate	0.613504	0.0222105						3-phosphoglycerate	0.693549	0.000442659
N-acetyl spermine	0.516866	0.00615799		GSH/GSSG_posi	0.583807	0.00483254		CDP-nega	0.587916	0.000376457						NAD/NADH_posi	0.690493	0.0018176
trehalose-6-Phosphate	0.487925	0.000563667		NAD+_posi	0.582312	7.02099e-05		CMP	0.562829	1.27377e-06						GSH/GSSG_neg	0.689621	4.55473e-05
acetyl-CoA-posi	0.478469	0.000364438		GDP-nega	0.554177	0.0336324		AMP	0.55407	2.55937e-09						biotin	0.67967	0.0266173
Kynurenine	0.460998	0.0135088		3-phosphoglycerate	0.553413	4.53683e-05		N-acetyl-glutamine	0.546193	0.0200068						2-keto-isovalerate	0.676224	3.27559e-05
methylnicotinamide	0.435669	0.00528585		S-ribosyl-L-homocysteine-nega	0.546422	0.0178351		phosphoenolpyruvate	0.541457	0.00152512						UTP-nega	0.671406	0.010496
Cystine	0.412773	0.0042136		SBP	0.543407	0.000383385		Atrolactic acid	0.540042	0.043489						glucose-1-phosphate	0.668833	6.6242e-05
Carbamoyl phosphate	0.333519	1.3462e-10		ADP-nega	0.535159	8.42021e-05		UDP-nega	0.532431	2.29019e-05						Thiamine pyrophosphate	0.668598	0.0282905
				dGDP-nega	0.535159	8.42021e-05		dTMP	0.52354	6.33999e-05						fructose-6-phosphate	0.660586	0.000163687
				IDP-nega	0.519963	0.000141528		2,3-dihydroxybenzoic acid	0.52003	0.00227919						Maleic acid	0.659711	2.33575e-07
				guanine	0.517796	0.000277801		Cellobiose	0.5085	4.5408e-07						malate	0.654396	2.18705e-05
				Glycerophosphocholine	0.514045	4.20913e-06		GMP	0.493903	3.90777e-07						fumarate	0.652775	9.62145e-08
				CMP	0.50744	1.27377e-06		IMP	0.491473	3.77267e-09						NAD+_nega	0.647525	3.35578e-07
				deoxyinosine	0.498985	0.0068126		6-phospho-D-gluconate	0.475777	0.0219524						dTMP	0.64289	0.0109073
				S-adenosyl-L-methionine	0.470889	0.000248757		2-keto-isovalerate	0.469942	0.00444105						phosphoenolpyruvate	0.634882	0.027328
				UDP-nega	0.456097	2.29019e-05		UMP	0.461085	2.98149e-07						UMP	0.63265	2.11331e-05
				dATP-nega	0.451787	0.0255809		fumarate	0.44272	0.0013967						glutathione-nega	0.6276	1.16606e-05
				dTMP	0.444526	6.33999e-05		Maleic acid	0.43383	0.00204392						UDP-D-glucose	0.626147	3.79856e-07
				dephospho-CoA-nega	0.42459	0.000605711		malate	0.400203	0.00302433						NAD+_posi	0.620831	2.26946e-07
				dTTP-nega	0.423881	0.0243339		Xanthurenic acid	0.371466	0.0308197						Geranyl-PP	0.604795	0.0162228
				5-methyl-THF	0.419269	0.00034584		acetyl-CoA-posi	0.363928	0.00326378						AMP	0.5909	0.000148768
				Atrolactic acid	0.41175	0.043489		inosine	0.336292	5.65321e-05						GMP	0.58141	0.000258615
				phosphoenolpyruvate	0.408957	0.00152512		4-aminobutyrate	0.334813	0.00646301						N-acetyl-glutamine	0.568821	0.000208813
				dTMP-nega	0.39326	0.00228424		dCTP-nega	0.333565	0.000152704						glutathione	0.556849	1.42277e-05
				2,3-dihydroxybenzoic acid	0.385373	0.00227919		Phosphorylcholine	0.316815	0.00103937						IMP	0.556566	2.03452e-05
				dCTP-nega	0.368325	0.000152704		S-adenosyl-L-methionine	0.302571	0.000248757						Cellobiose	0.525255	0.00432928
				Xanthurenic acid	0.359628	0.0308197		dCDP-nega	0.268458	9.65753e-06						Carbamoyl phosphate	0.521024	6.52805e-08
				L-arginino-succinate	0.345184	4.19158e-07		Glycerophosphocholine	0.236406	4.20913e-06						O-acetyl-L-serine	0.519766	0.00330087
				arginosuccinic acid	0.32074	1.70281e-07		L-arginino-succinate	0.232433	4.19158e-07						SBP	0.500542	0.000580184
				UMP	0.315115	2.98149e-07		dATP-nega	0.227258	0.0255809						Hydroxyphenylacetic acid	0.48533	0.0180739
				AMP	0.312798	2.55937e-09		arginosuccinic acid	0.224632	1.70281e-07						dihydroorotate	0.481095	9.3462e-07
				dCDP-nega	0.276396	9.65753e-06		Carbamoyl phosphate	0.173772	0.0355032						2,3-dihydroxybenzoic acid	0.471646	0.00449019
				Cellobiose	0.268713	4.5408e-07		dTTP-nega	0.169222	0.0243339						S-methyl-5-thioadenosine	0.452595	0.00896189
				IMP	0.261721	3.77267e-09		dTMP-nega	0.121284	0.00228424						inosine	0.427226	1.06202e-06
				inosine	0.256856	5.65321e-05										Phosphorylcholine	0.413947	9.14891e-07
				GMP	0.241791	3.90777e-07										IDP-nega	0.378932	4.8161e-05
																4-aminobutyrate	0.37843	1.92855e-08
																S-adenosyl-L-homoCysteine-posi	0.37842	0.0166101
																ADP-nega	0.374382	2.93569e-05
																dGDP-nega	0.374382	2.93569e-05
																Glycerophosphocholine	0.347007	7.57648e-11
																ADP-D-glucose	0.342612	0.00333631
																adenosine 5-phosphosulfate	0.338987	3.30973e-05
																Xanthurenic acid	0.335721	0.00203816
																UDP-nega	0.305439	5.57999e-06
																S-adenosyl-L-homocysteine-nega	0.29586	0.011228
																S-adenosyl-L-methionine	0.282196	6.27814e-07
																3-methylphenylacetic acid	0.278569	2.41238e-06
																dCTP-nega	0.25837	2.2556e-06
																dTTP-nega	0.245359	9.5485e-08
																L-arginino-succinate	0.235677	7.28057e-13
																arginosuccinic acid	0.221661	7.6393e-12
																dCDP-nega	0.202568	2.51514e-07
																dATP-nega	0.186756	7.4004e-06
																dTMP-nega	0.163087	4.7565e-09
																dTDP-nega	0.0987728	8.09807e-09
